# Supplementary material for: A Universal Trend of Reduced mRNA Stability near the Translation-Initiation Site in Prokaryotes and Eukaryotes
Source: PubMed Central journal article supplement (PMC2816680; doi:10.1371/journal.pcbi.1000664), 2010-02-05
Supplement: pcbi.1000664.s001.pdf [file pcbi.1000664.s001.pdf]

Table S1: Mean and standard error of  $Z_{\Delta G}$  for each window

| Type     | Species                                | Window 1     | Window 2     | Window 3     | Window 4     | Window 5     | Window 6     | Window 7     | Window 8     | Window 9     | Window 10    | Window 11    | Window 12    | Window 13    |
|----------|----------------------------------------|--------------|--------------|--------------|--------------|--------------|--------------|--------------|--------------|--------------|--------------|--------------|--------------|--------------|
| Bacteria | <i>Acaryochloris marina</i>            | 0.22 ± 0.01  | 0.20 ± 0.01  | 0.03 ± 0.01  | -0.11 ± 0.01 | -0.10 ± 0.01 | -0.08 ± 0.01 | -0.08 ± 0.01 | -0.06 ± 0.01 | -0.05 ± 0.01 | -0.08 ± 0.01 | -0.08 ± 0.01 | -0.08 ± 0.01 | -0.08 ± 0.01 |
| Bacteria | <i>Acholeplasma laidlawii</i>          | 0.13 ± 0.02  | -0.04 ± 0.03 | -0.23 ± 0.03 | -0.24 ± 0.03 | -0.22 ± 0.03 | -0.29 ± 0.03 | -0.27 ± 0.03 | -0.22 ± 0.03 | -0.22 ± 0.03 | -0.22 ± 0.03 | -0.17 ± 0.03 | -0.20 ± 0.03 | -0.20 ± 0.03 |
| Bacteria | <i>Acidiphilium cryptum</i>            | 0.54 ± 0.02  | 0.43 ± 0.02  | 0.18 ± 0.02  | 0.04 ± 0.02  | -0.01 ± 0.02 | -0.02 ± 0.02 | -0.06 ± 0.02 | -0.07 ± 0.02 | -0.07 ± 0.02 | -0.07 ± 0.02 | -0.06 ± 0.02 | -0.06 ± 0.02 | -0.08 ± 0.02 |
| Bacteria | <i>Acidithiobacillus ferrooxidans</i>  | 0.36 ± 0.02  | 0.26 ± 0.02  | 0.08 ± 0.02  | -0.07 ± 0.02 | -0.08 ± 0.02 | -0.11 ± 0.02 | -0.08 ± 0.02 | -0.08 ± 0.02 | -0.12 ± 0.02 | -0.10 ± 0.02 | -0.08 ± 0.02 | -0.08 ± 0.02 | -0.06 ± 0.02 |
| Bacteria | <i>Acidobacteria bacterium</i>         | 0.42 ± 0.01  | 0.39 ± 0.02  | 0.21 ± 0.02  | 0.06 ± 0.02  | -0.01 ± 0.02 | -0.01 ± 0.02 | -0.04 ± 0.02 | -0.05 ± 0.02 | -0.03 ± 0.02 | -0.08 ± 0.02 | -0.08 ± 0.02 | -0.07 ± 0.02 | -0.07 ± 0.01 |
| Bacteria | <i>Acidobacterium capsulatum</i>       | 0.50 ± 0.02  | 0.46 ± 0.02  | 0.23 ± 0.02  | 0.04 ± 0.02  | 0.02 ± 0.02  | -0.02 ± 0.02 | -0.04 ± 0.02 | -0.07 ± 0.02 | -0.06 ± 0.02 | -0.09 ± 0.02 | -0.08 ± 0.02 | -0.10 ± 0.02 | -0.11 ± 0.02 |
| Bacteria | <i>Acidothermus cellulolyticus</i>     | 0.25 ± 0.02  | 0.21 ± 0.02  | 0.02 ± 0.02  | -0.04 ± 0.02 | -0.04 ± 0.02 | -0.05 ± 0.02 | -0.08 ± 0.02 | -0.07 ± 0.02 | -0.08 ± 0.02 | -0.05 ± 0.02 | -0.07 ± 0.02 | -0.11 ± 0.02 | -0.11 ± 0.02 |
| Bacteria | <i>Acidovorax citrulli</i>             | 0.78 ± 0.02  | 0.61 ± 0.02  | 0.27 ± 0.02  | 0.13 ± 0.02  | 0.04 ± 0.02  | 0.00 ± 0.02  | -0.02 ± 0.02 | -0.07 ± 0.02 | -0.08 ± 0.02 | -0.11 ± 0.02 | -0.13 ± 0.02 | -0.12 ± 0.02 | -0.14 ± 0.01 |
| Bacteria | <i>Acinetobacter baumannii</i>         | 0.09 ± 0.02  | 0.01 ± 0.02  | -0.14 ± 0.02 | -0.19 ± 0.02 | -0.20 ± 0.02 | -0.15 ± 0.02 | -0.12 ± 0.02 | -0.13 ± 0.02 | -0.13 ± 0.02 | -0.09 ± 0.02 | -0.10 ± 0.02 | -0.10 ± 0.02 | -0.12 ± 0.02 |
| Bacteria | <i>Actinobacillus pleuropneumoniae</i> | 0.24 ± 0.02  | 0.11 ± 0.02  | -0.10 ± 0.02 | -0.11 ± 0.03 | -0.11 ± 0.02 | -0.12 ± 0.02 | -0.10 ± 0.02 | -0.13 ± 0.02 | -0.14 ± 0.02 | -0.10 ± 0.02 | -0.11 ± 0.02 | -0.14 ± 0.02 | -0.14 ± 0.02 |
| Bacteria | <i>Aeromonas hydrophila</i>            | 0.65 ± 0.02  | 0.47 ± 0.02  | 0.17 ± 0.02  | 0.11 ± 0.02  | 0.04 ± 0.02  | 0.04 ± 0.02  | 0.02 ± 0.02  | 0.01 ± 0.02  | -0.03 ± 0.02 | -0.05 ± 0.02 | -0.07 ± 0.02 | -0.08 ± 0.02 | -0.08 ± 0.02 |
| Bacteria | <i>Agrobacterium radiobacter</i>       | 0.55 ± 0.01  | 0.41 ± 0.01  | 0.13 ± 0.01  | 0.02 ± 0.01  | -0.06 ± 0.01 | -0.05 ± 0.01 | -0.09 ± 0.01 | -0.06 ± 0.01 | -0.08 ± 0.01 | -0.11 ± 0.01 | -0.08 ± 0.01 | -0.11 ± 0.01 | -0.12 ± 0.01 |
| Bacteria | <i>Akkermansia muciniphila</i>         | 0.50 ± 0.02  | 0.40 ± 0.02  | 0.06 ± 0.02  | -0.11 ± 0.02 | -0.13 ± 0.02 | -0.13 ± 0.02 | -0.12 ± 0.02 | -0.12 ± 0.02 | -0.10 ± 0.02 | -0.13 ± 0.02 | -0.12 ± 0.02 | -0.13 ± 0.02 | -0.09 ± 0.02 |
| Bacteria | <i>Alcanivorax borkumensis</i>         | 0.34 ± 0.02  | 0.18 ± 0.02  | -0.04 ± 0.02 | -0.12 ± 0.02 | -0.12 ± 0.02 | -0.11 ± 0.02 | -0.14 ± 0.02 | -0.16 ± 0.02 | -0.13 ± 0.02 | -0.12 ± 0.02 | -0.12 ± 0.02 | -0.18 ± 0.02 | -0.17 ± 0.02 |
| Bacteria | <i>Aliivibrio salmonicida</i>          | 0.23 ± 0.02  | 0.06 ± 0.02  | -0.16 ± 0.02 | -0.14 ± 0.02 | -0.30 ± 0.02 | -0.29 ± 0.02 | -0.21 ± 0.02 | -0.09 ± 0.02 | -0.15 ± 0.02 | -0.19 ± 0.02 | -0.15 ± 0.02 | -0.18 ± 0.02 | -0.17 ± 0.02 |
| Bacteria | <i>Alkalilimnicola ehrlichii</i>       | 0.63 ± 0.02  | 0.48 ± 0.02  | 0.18 ± 0.02  | -0.03 ± 0.02 | -0.10 ± 0.02 | -0.11 ± 0.02 | -0.10 ± 0.02 | -0.15 ± 0.02 | -0.08 ± 0.02 | -0.10 ± 0.02 | -0.12 ± 0.02 | -0.15 ± 0.02 | -0.11 ± 0.02 |
| Bacteria | <i>Alkaliphilus metalliredigens</i>    | 0.15 ± 0.01  | 0.11 ± 0.01  | 0.01 ± 0.02  | -0.02 ± 0.02 | -0.02 ± 0.02 | -0.05 ± 0.02 | -0.08 ± 0.02 | -0.06 ± 0.02 | -0.07 ± 0.02 | -0.04 ± 0.02 | -0.07 ± 0.02 | -0.09 ± 0.02 | -0.03 ± 0.02 |
| Bacteria | <i>Alteromonas macleodii</i>           | 0.17 ± 0.02  | 0.11 ± 0.02  | -0.10 ± 0.02 | -0.10 ± 0.02 | -0.16 ± 0.02 | -0.18 ± 0.02 | -0.12 ± 0.02 | -0.13 ± 0.02 | -0.12 ± 0.02 | -0.10 ± 0.02 | -0.13 ± 0.02 | -0.12 ± 0.02 | -0.14 ± 0.02 |
| Bacteria | <i>Anabaena variabilis</i>             | 0.13 ± 0.01  | 0.11 ± 0.01  | -0.02 ± 0.02 | -0.11 ± 0.02 | -0.18 ± 0.02 | -0.15 ± 0.02 | -0.10 ± 0.01 | -0.09 ± 0.01 | -0.08 ± 0.02 | -0.07 ± 0.01 | -0.07 ± 0.01 | -0.07 ± 0.01 | -0.08 ± 0.01 |
| Bacteria | <i>Anaerocellum thermophilum</i>       | 0.04 ± 0.02  | 0.00 ± 0.02  | -0.04 ± 0.02 | -0.08 ± 0.02 | -0.03 ± 0.02 | -0.03 ± 0.02 | -0.05 ± 0.02 | -0.04 ± 0.02 | -0.03 ± 0.02 | -0.04 ± 0.02 | -0.04 ± 0.02 | -0.04 ± 0.02 | -0.08 ± 0.02 |
| Bacteria | <i>Anaeromyxobacter dehalogenans</i>   | 0.72 ± 0.02  | 0.63 ± 0.02  | 0.36 ± 0.02  | 0.14 ± 0.02  | 0.05 ± 0.02  | -0.02 ± 0.02 | -0.02 ± 0.02 | -0.03 ± 0.02 | -0.06 ± 0.02 | -0.06 ± 0.02 | -0.06 ± 0.02 | -0.06 ± 0.02 | -0.06 ± 0.02 |
| Bacteria | <i>Anaplasma marginale</i>             | 0.15 ± 0.03  | 0.17 ± 0.03  | 0.02 ± 0.03  | -0.06 ± 0.03 | 0.00 ± 0.03  | -0.09 ± 0.03 | -0.13 ± 0.03 | -0.18 ± 0.03 | -0.11 ± 0.03 | -0.14 ± 0.03 | -0.07 ± 0.03 | -0.06 ± 0.03 | -0.05 ± 0.03 |
| Bacteria | <i>Anoxybacillus flavithermus</i>      | 0.03 ± 0.02  | 0.05 ± 0.02  | -0.01 ± 0.02 | 0.02 ± 0.02  | 0.00 ± 0.02  | -0.03 ± 0.02 | -0.03 ± 0.02 | -0.06 ± 0.02 | -0.06 ± 0.02 | -0.05 ± 0.02 | -0.04 ± 0.02 | -0.08 ± 0.02 | -0.07 ± 0.02 |
| Bacteria | <i>Aquifex aeolicus</i>                | 0.03 ± 0.03  | 0.01 ± 0.03  | 0.00 ± 0.03  | -0.04 ± 0.03 | -0.11 ± 0.03 | -0.07 ± 0.03 | 0.00 ± 0.03  | -0.03 ± 0.03 | -0.04 ± 0.03 | -0.07 ± 0.03 | -0.07 ± 0.03 | -0.02 ± 0.03 | -0.05 ± 0.03 |
| Bacteria | <i>Archaeoglobus fulgidus</i>          | 0.11 ± 0.02  | 0.11 ± 0.02  | 0.03 ± 0.02  | 0.03 ± 0.02  | 0.01 ± 0.02  | 0.02 ± 0.02  | -0.02 ± 0.02 | -0.02 ± 0.02 | -0.02 ± 0.02 | -0.02 ± 0.02 | 0.03 ± 0.02  | 0.00 ± 0.02  | 0.03 ± 0.02  |
| Bacteria | <i>Arcobacter butzleri</i>             | 0.06 ± 0.02  | 0.00 ± 0.02  | -0.18 ± 0.03 | -0.19 ± 0.02 | -0.19 ± 0.02 | -0.21 ± 0.03 | -0.18 ± 0.02 | -0.13 ± 0.02 | -0.09 ± 0.02 | -0.11 ± 0.02 | -0.09 ± 0.02 | -0.07 ± 0.02 | -0.07 ± 0.02 |
| Bacteria | <i>Aromatoleum aromaticum</i>          | 0.51 ± 0.02  | 0.41 ± 0.02  | 0.16 ± 0.02  | 0.06 ± 0.02  | 0.02 ± 0.02  | -0.01 ± 0.02 | -0.03 ± 0.02 | -0.04 ± 0.02 | -0.04 ± 0.02 | -0.06 ± 0.02 | -0.07 ± 0.02 | -0.08 ± 0.02 | -0.11 ± 0.02 |
| Bacteria | <i>Arthrobacter aurescens</i>          | 0.35 ± 0.02  | 0.27 ± 0.02  | 0.08 ± 0.02  | 0.01 ± 0.02  | 0.01 ± 0.02  | -0.01 ± 0.02 | -0.06 ± 0.02 | -0.05 ± 0.02 | -0.05 ± 0.02 | -0.04 ± 0.02 | -0.02 ± 0.02 | -0.05 ± 0.02 | -0.06 ± 0.02 |
| Bacteria | <i>Aster yellows</i>                   | -0.01 ± 0.04 | 0.03 ± 0.04  | -0.02 ± 0.04 | -0.06 ± 0.04 | -0.01 ± 0.04 | -0.01 ± 0.04 | -0.01 ± 0.04 | 0.03 ± 0.04  | -0.05 ± 0.04 | -0.03 ± 0.04 | -0.04 ± 0.04 | 0.00 ± 0.04  | -0.09 ± 0.04 |
| Bacteria | <i>Azoarcus sp. BH72</i>               | 0.71 ± 0.02  | 0.56 ± 0.02  | 0.22 ± 0.02  | 0.09 ± 0.02  | 0.02 ± 0.02  | 0.02 ± 0.02  | -0.05 ± 0.02 | -0.02 ± 0.02 | -0.05 ± 0.02 | -0.09 ± 0.02 | -0.08 ± 0.02 | -0.09 ± 0.02 | -0.07 ± 0.02 |
| Bacteria | <i>Azorhizobium caulinodans</i>        | 0.53 ± 0.02  | 0.43 ± 0.02  | 0.25 ± 0.02  | 0.10 ± 0.02  | 0.06 ± 0.02  | 0.03 ± 0.02  | 0.05 ± 0.02  | -0.02 ± 0.02 | -0.01 ± 0.02 | -0.04 ± 0.02 | -0.04 ± 0.02 | -0.05 ± 0.02 | -0.05 ± 0.02 |
| Bacteria | <i>Azotobacter vinelandii</i>          | 0.60 ± 0.02  | 0.48 ± 0.02  | 0.23 ± 0.02  | 0.10 ± 0.02  | 0.04 ± 0.02  | 0.01 ± 0.02  | -0.03 ± 0.02 | -0.06 ± 0.02 | -0.07 ± 0.02 | -0.08 ± 0.01 | -0.07 ± 0.01 | -0.07 ± 0.01 | -0.07 ± 0.01 |
| Bacteria | <i>Bacillus amyloliquefaciens</i>      | 0.29 ± 0.02  | 0.21 ± 0.02  | 0.07 ± 0.02  | 0.05 ± 0.02  | 0.00 ± 0.02  | -0.01 ± 0.02 | -0.06 ± 0.02 | -0.07 ± 0.02 | -0.06 ± 0.02 | -0.07 ± 0.02 | -0.07 ± 0.02 | -0.08 ± 0.02 | -0.09 ± 0.02 |
| Bacteria | <i>Bacteroides fragilis</i>            | 0.37 ± 0.01  | 0.17 ± 0.02  | -0.21 ± 0.02 | -0.26 ± 0.02 | -0.21 ± 0.02 | -0.13 ± 0.02 | -0.12 ± 0.02 | -0.12 ± 0.02 | -0.14 ± 0.02 | -0.15 ± 0.02 | -0.15 ± 0.02 | -0.11 ± 0.02 | -0.09 ± 0.02 |
| Bacteria | <i>Bartonella bacilliformis</i>        | 0.04 ± 0.03  | -0.01 ± 0.03 | -0.15 ± 0.03 | -0.13 ± 0.03 | -0.16 ± 0.03 | -0.22 ± 0.03 | -0.17 ± 0.03 | -0.13 ± 0.03 | -0.10 ± 0.03 | -0.11 ± 0.03 | -0.09 ± 0.03 | -0.15 ± 0.03 | -0.13 ± 0.03 |
| Bacteria | <i>Baumannia cicadellinicola</i>       | -0.02 ± 0.04 | -0.23 ± 0.05 | -0.31 ± 0.05 | -0.25 ± 0.05 | -0.25 ± 0.05 | -0.15 ± 0.05 | -0.20 ± 0.05 | -0.11 ± 0.04 | -0.13 ± 0.05 | -0.16 ± 0.04 | -0.18 ± 0.05 | -0.10 ± 0.04 | -0.10 ± 0.04 |
| Bacteria | <i>Bdellovibrio bacteriovorus</i>      | 0.36 ± 0.02  | 0.32 ± 0.02  | 0.27 ± 0.02  | 0.11 ± 0.02  | -0.15 ± 0.02 | -0.16 ± 0.02 | -0.15 ± 0.02 | -0.11 ± 0.02 | -0.13 ± 0.02 | -0.13 ± 0.02 | -0.12 ± 0.02 | -0.15 ± 0.02 | -0.13 ± 0.02 |
| Bacteria | <i>Beijerinckia indica</i>             | 0.34 ± 0.02  | 0.24 ± 0.02  | 0.00 ± 0.02  | -0.08 ± 0.02 | -0.10 ± 0.02 | -0.09 ± 0.02 | -0.08 ± 0.02 | -0.10 ± 0.02 | -0.08 ± 0.02 | -0.10 ± 0.02 | -0.11 ± 0.02 | -0.13 ± 0.02 | -0.12 ± 0.02 |

Continued on next page

| Type     | Species                                     | Window 1    | Window 2     | Window 3     | Window 4     | Window 5     | Window 6     | Window 7     | Window 8     | Window 9     | Window 10    | Window 11    | Window 12    | Window 13    |
|----------|---------------------------------------------|-------------|--------------|--------------|--------------|--------------|--------------|--------------|--------------|--------------|--------------|--------------|--------------|--------------|
| Bacteria | <i>Beutenbergia cavernae</i>                | 0.53 ± 0.02 | 0.38 ± 0.02  | 0.14 ± 0.02  | 0.09 ± 0.02  | 0.05 ± 0.02  | 0.01 ± 0.02  | -0.02 ± 0.02 | -0.02 ± 0.02 | -0.05 ± 0.02 | -0.06 ± 0.02 | -0.06 ± 0.02 | -0.03 ± 0.02 | -0.08 ± 0.02 |
| Bacteria | <i>Bifidobacterium adolescentis</i>         | 0.39 ± 0.03 | 0.30 ± 0.03  | 0.10 ± 0.03  | 0.02 ± 0.03  | -0.01 ± 0.03 | -0.07 ± 0.03 | -0.08 ± 0.03 | -0.08 ± 0.03 | -0.09 ± 0.03 | -0.14 ± 0.03 | -0.05 ± 0.03 | -0.05 ± 0.03 | -0.06 ± 0.03 |
| Bacteria | <i>Bordetella avium</i>                     | 0.58 ± 0.02 | 0.35 ± 0.02  | 0.03 ± 0.02  | -0.06 ± 0.02 | -0.09 ± 0.02 | -0.09 ± 0.02 | -0.11 ± 0.02 | -0.12 ± 0.02 | -0.15 ± 0.02 | -0.16 ± 0.02 | -0.14 ± 0.02 | -0.18 ± 0.02 | -0.16 ± 0.02 |
| Bacteria | <i>Borrelia afzelii</i>                     | 0.01 ± 0.04 | -0.03 ± 0.04 | -0.05 ± 0.04 | -0.14 ± 0.04 | -0.17 ± 0.04 | -0.13 ± 0.04 | -0.07 ± 0.04 | -0.05 ± 0.04 | -0.07 ± 0.04 | 0.00 ± 0.03  | -0.04 ± 0.04 | -0.04 ± 0.03 | -0.07 ± 0.04 |
| Bacteria | <i>Brachyspira hyodysenteriae</i>           | 0.10 ± 0.02 | 0.08 ± 0.02  | -0.04 ± 0.02 | -0.06 ± 0.02 | -0.10 ± 0.02 | -0.08 ± 0.02 | -0.06 ± 0.02 | -0.05 ± 0.02 | 0.00 ± 0.02  | -0.02 ± 0.02 | -0.06 ± 0.02 | -0.07 ± 0.02 | -0.01 ± 0.02 |
| Bacteria | <i>Bradyrhizobium japonicum</i>             | 0.50 ± 0.01 | 0.44 ± 0.01  | 0.27 ± 0.01  | 0.10 ± 0.01  | 0.04 ± 0.01  | 0.00 ± 0.01  | -0.03 ± 0.01 | -0.05 ± 0.01 | -0.04 ± 0.01 | -0.08 ± 0.01 | -0.08 ± 0.01 | -0.08 ± 0.01 | -0.09 ± 0.01 |
| Bacteria | <i>Brevibacillus brevis</i>                 | 0.21 ± 0.01 | 0.15 ± 0.01  | 0.05 ± 0.01  | 0.01 ± 0.01  | 0.02 ± 0.01  | 0.02 ± 0.01  | -0.01 ± 0.01 | 0.01 ± 0.01  | -0.01 ± 0.01 | 0.00 ± 0.01  | 0.00 ± 0.01  | -0.03 ± 0.01 | -0.02 ± 0.01 |
| Bacteria | <i>Brucella abortus</i>                     | 0.44 ± 0.02 | 0.30 ± 0.02  | 0.12 ± 0.02  | -0.04 ± 0.02 | -0.13 ± 0.02 | -0.13 ± 0.02 | -0.08 ± 0.02 | -0.10 ± 0.02 | -0.10 ± 0.02 | -0.10 ± 0.02 | -0.12 ± 0.02 | -0.16 ± 0.02 | -0.17 ± 0.02 |
| Bacteria | <i>Buchnera aphidicola</i>                  | 0.02 ± 0.04 | 0.04 ± 0.04  | -0.05 ± 0.04 | -0.03 ± 0.04 | -0.09 ± 0.04 | -0.09 ± 0.04 | -0.05 ± 0.04 | -0.10 ± 0.04 | -0.03 ± 0.04 | -0.04 ± 0.04 | -0.02 ± 0.04 | -0.13 ± 0.05 | -0.06 ± 0.04 |
| Bacteria | <i>Burkholderia ambifaria</i>               | 0.84 ± 0.01 | 0.67 ± 0.01  | 0.29 ± 0.01  | 0.13 ± 0.01  | 0.06 ± 0.01  | 0.02 ± 0.01  | -0.04 ± 0.01 | -0.06 ± 0.01 | -0.10 ± 0.01 | -0.10 ± 0.01 | -0.15 ± 0.01 | -0.14 ± 0.01 | -0.16 ± 0.01 |
| Bacteria | <i>Caldicellulosiruptor saccharolyticus</i> | 0.03 ± 0.02 | 0.03 ± 0.02  | 0.01 ± 0.02  | -0.02 ± 0.02 | -0.05 ± 0.02 | -0.02 ± 0.02 | -0.06 ± 0.02 | -0.04 ± 0.02 | -0.08 ± 0.02 | -0.08 ± 0.02 | -0.03 ± 0.02 | -0.09 ± 0.02 | -0.06 ± 0.02 |
| Bacteria | <i>Campylobacter concisus</i>               | 0.21 ± 0.02 | 0.08 ± 0.02  | -0.11 ± 0.03 | -0.12 ± 0.03 | -0.16 ± 0.03 | -0.19 ± 0.02 | -0.17 ± 0.03 | -0.18 ± 0.02 | -0.20 ± 0.02 | -0.13 ± 0.02 | -0.15 ± 0.03 | -0.15 ± 0.02 | -0.20 ± 0.02 |
| Bacteria | <i>Candidatus Annoeophilus</i>              | 0.17 ± 0.03 | 0.07 ± 0.03  | -0.04 ± 0.03 | -0.13 ± 0.03 | -0.16 ± 0.03 | -0.13 ± 0.03 | -0.08 ± 0.03 | -0.07 ± 0.03 | -0.09 ± 0.03 | -0.01 ± 0.03 | -0.04 ± 0.03 | -0.05 ± 0.03 | -0.07 ± 0.03 |
| Bacteria | <i>Carboxydotherrnus hydrogenoformans</i>   | 0.04 ± 0.02 | 0.02 ± 0.02  | -0.07 ± 0.02 | -0.05 ± 0.02 | -0.05 ± 0.02 | -0.07 ± 0.02 | -0.08 ± 0.02 | -0.06 ± 0.02 | -0.12 ± 0.02 | -0.10 ± 0.02 | -0.09 ± 0.02 | -0.07 ± 0.02 | -0.08 ± 0.02 |
| Bacteria | <i>Caulobacter crescentus</i>               | 0.55 ± 0.02 | 0.45 ± 0.02  | 0.22 ± 0.02  | 0.05 ± 0.02  | 0.01 ± 0.02  | 0.01 ± 0.02  | 0.03 ± 0.02  | 0.00 ± 0.02  | -0.05 ± 0.02 | -0.05 ± 0.02 | -0.07 ± 0.02 | -0.09 ± 0.02 | -0.07 ± 0.02 |
| Bacteria | <i>Cellvibrio japonicus</i>                 | 0.33 ± 0.02 | 0.27 ± 0.02  | 0.07 ± 0.02  | -0.06 ± 0.02 | -0.14 ± 0.02 | -0.13 ± 0.02 | -0.12 ± 0.02 | -0.09 ± 0.02 | -0.12 ± 0.02 | -0.09 ± 0.02 | -0.10 ± 0.02 | -0.10 ± 0.02 | -0.14 ± 0.02 |
| Bacteria | <i>Chlamydia muridarum</i>                  | 0.06 ± 0.03 | -0.02 ± 0.03 | -0.13 ± 0.04 | -0.10 ± 0.03 | -0.15 ± 0.04 | -0.19 ± 0.04 | -0.12 ± 0.04 | -0.21 ± 0.04 | -0.20 ± 0.04 | -0.15 ± 0.04 | -0.16 ± 0.04 | -0.19 ± 0.04 | -0.17 ± 0.04 |
| Bacteria | <i>Chlamydomytila abortus</i>               | 0.06 ± 0.03 | 0.02 ± 0.03  | -0.16 ± 0.04 | -0.16 ± 0.04 | -0.18 ± 0.04 | -0.19 ± 0.04 | -0.11 ± 0.03 | -0.10 ± 0.03 | -0.10 ± 0.04 | -0.09 ± 0.03 | -0.05 ± 0.03 | -0.11 ± 0.04 | -0.12 ± 0.03 |
| Bacteria | <i>Chlorobaculum parvum</i>                 | 0.55 ± 0.02 | 0.37 ± 0.02  | 0.10 ± 0.02  | -0.02 ± 0.02 | -0.02 ± 0.02 | -0.03 ± 0.02 | -0.04 ± 0.02 | -0.07 ± 0.02 | -0.05 ± 0.02 | -0.09 ± 0.02 | -0.08 ± 0.02 | -0.06 ± 0.02 | -0.09 ± 0.02 |
| Bacteria | <i>Chlorobium chlorochromatii</i>           | 0.24 ± 0.02 | 0.14 ± 0.02  | -0.15 ± 0.03 | -0.26 ± 0.03 | -0.27 ± 0.03 | -0.19 ± 0.02 | -0.15 ± 0.02 | -0.17 ± 0.02 | -0.17 ± 0.02 | -0.16 ± 0.02 | -0.16 ± 0.02 | -0.17 ± 0.02 | -0.13 ± 0.02 |
| Bacteria | <i>Chloroflexus aggregans</i>               | 0.32 ± 0.02 | 0.28 ± 0.02  | 0.10 ± 0.02  | -0.01 ± 0.02 | -0.06 ± 0.02 | -0.07 ± 0.02 | -0.06 ± 0.02 | -0.04 ± 0.02 | -0.03 ± 0.02 | -0.08 ± 0.02 | -0.07 ± 0.02 | -0.04 ± 0.02 | -0.04 ± 0.02 |
| Bacteria | <i>Chloroherpeton thalassium</i>            | 0.30 ± 0.02 | 0.21 ± 0.02  | -0.02 ± 0.02 | -0.07 ± 0.02 | -0.10 ± 0.02 | -0.08 ± 0.02 | -0.03 ± 0.02 | -0.09 ± 0.02 | -0.09 ± 0.02 | -0.10 ± 0.02 | -0.06 ± 0.02 | -0.10 ± 0.02 | -0.13 ± 0.02 |
| Bacteria | <i>Chromobacterium violaceum</i>            | 0.61 ± 0.02 | 0.44 ± 0.02  | 0.17 ± 0.02  | 0.05 ± 0.02  | 0.03 ± 0.02  | -0.03 ± 0.02 | -0.04 ± 0.02 | -0.06 ± 0.02 | -0.09 ± 0.02 | -0.11 ± 0.02 | -0.13 ± 0.02 | -0.11 ± 0.02 | -0.11 ± 0.02 |
| Bacteria | <i>Chromohalobacter salzigens</i>           | 0.56 ± 0.02 | 0.39 ± 0.02  | 0.11 ± 0.02  | 0.00 ± 0.02  | -0.03 ± 0.02 | -0.06 ± 0.02 | -0.08 ± 0.02 | -0.10 ± 0.02 | -0.10 ± 0.02 | -0.14 ± 0.02 | -0.15 ± 0.02 | -0.13 ± 0.02 | -0.15 ± 0.02 |
| Bacteria | <i>Citrobacter koseri</i>                   | 0.34 ± 0.02 | 0.26 ± 0.02  | 0.05 ± 0.02  | 0.02 ± 0.02  | -0.02 ± 0.02 | 0.00 ± 0.02  | 0.00 ± 0.02  | -0.04 ± 0.02 | -0.05 ± 0.02 | -0.05 ± 0.02 | -0.05 ± 0.02 | -0.06 ± 0.02 | -0.10 ± 0.02 |
| Bacteria | <i>Clavibacter michiganensis</i>            | 0.75 ± 0.02 | 0.55 ± 0.02  | 0.26 ± 0.02  | 0.13 ± 0.02  | 0.10 ± 0.02  | 0.07 ± 0.02  | 0.02 ± 0.02  | 0.01 ± 0.02  | 0.00 ± 0.02  | -0.01 ± 0.02 | -0.02 ± 0.02 | -0.02 ± 0.02 | -0.03 ± 0.02 |
| Bacteria | <i>Clostridium acetobutylicum</i>           | 0.09 ± 0.02 | 0.03 ± 0.02  | -0.02 ± 0.02 | -0.07 ± 0.02 | -0.06 ± 0.02 | -0.07 ± 0.02 | -0.04 ± 0.02 | -0.03 ± 0.02 | -0.04 ± 0.02 | -0.05 ± 0.02 | -0.06 ± 0.02 | -0.06 ± 0.02 | -0.04 ± 0.02 |
| Bacteria | <i>Colwellia psychrerythraea</i>            | 0.21 ± 0.01 | 0.09 ± 0.02  | -0.13 ± 0.02 | -0.20 ± 0.02 | -0.20 ± 0.02 | -0.17 ± 0.02 | -0.18 ± 0.02 | -0.13 ± 0.02 | -0.16 ± 0.02 | -0.11 ± 0.02 | -0.14 ± 0.02 | -0.14 ± 0.02 | -0.11 ± 0.02 |
| Bacteria | <i>Coprothermobacter protocolyticus</i>     | 0.05 ± 0.03 | 0.04 ± 0.03  | -0.05 ± 0.03 | -0.10 ± 0.03 | -0.12 ± 0.03 | -0.11 ± 0.03 | -0.13 ± 0.03 | -0.11 ± 0.03 | -0.12 ± 0.03 | -0.07 ± 0.03 | -0.04 ± 0.03 | -0.06 ± 0.03 | -0.04 ± 0.03 |
| Bacteria | <i>Corynebacterium aurimucosum</i>          | 0.40 ± 0.02 | 0.29 ± 0.02  | 0.05 ± 0.02  | -0.01 ± 0.02 | -0.10 ± 0.02 | -0.06 ± 0.02 | -0.06 ± 0.02 | -0.08 ± 0.02 | -0.08 ± 0.02 | -0.10 ± 0.02 | -0.08 ± 0.02 | -0.09 ± 0.02 | -0.12 ± 0.02 |
| Bacteria | <i>Coziella burnetii</i>                    | 0.15 ± 0.02 | 0.12 ± 0.02  | -0.01 ± 0.02 | -0.05 ± 0.03 | -0.11 ± 0.03 | -0.15 ± 0.03 | -0.18 ± 0.03 | -0.13 ± 0.03 | -0.11 ± 0.03 | -0.09 ± 0.03 | -0.09 ± 0.03 | -0.10 ± 0.03 | -0.06 ± 0.03 |
| Bacteria | <i>Cronobacter sakazakii</i>                | 0.45 ± 0.02 | 0.32 ± 0.02  | 0.07 ± 0.02  | 0.00 ± 0.02  | 0.00 ± 0.02  | 0.01 ± 0.02  | -0.02 ± 0.02 | -0.03 ± 0.02 | -0.07 ± 0.02 | -0.09 ± 0.02 | -0.10 ± 0.02 | -0.10 ± 0.02 | -0.10 ± 0.02 |
| Bacteria | <i>Cupriavidus taiwanensis</i>              | 0.82 ± 0.02 | 0.64 ± 0.02  | 0.32 ± 0.02  | 0.15 ± 0.02  | 0.05 ± 0.02  | 0.01 ± 0.02  | -0.01 ± 0.01 | -0.06 ± 0.01 | -0.08 ± 0.01 | -0.11 ± 0.01 | -0.11 ± 0.01 | -0.13 ± 0.01 | -0.14 ± 0.01 |
| Bacteria | <i>Cyanothece sp. PCC 7424</i>              | 0.17 ± 0.01 | 0.14 ± 0.01  | 0.03 ± 0.01  | -0.04 ± 0.01 | -0.14 ± 0.02 | -0.14 ± 0.02 | -0.07 ± 0.01 | -0.06 ± 0.01 | -0.04 ± 0.01 | -0.02 ± 0.01 | -0.01 ± 0.01 | -0.03 ± 0.01 | 0.01 ± 0.01  |
| Bacteria | <i>Cytophaga hutchinsonii</i>               | 0.26 ± 0.02 | 0.20 ± 0.02  | -0.03 ± 0.02 | -0.20 ± 0.02 | -0.19 ± 0.02 | -0.14 ± 0.02 | -0.08 ± 0.02 | -0.10 ± 0.02 | -0.10 ± 0.02 | -0.09 ± 0.02 | -0.14 ± 0.02 | -0.13 ± 0.02 | -0.07 ± 0.02 |
| Bacteria | <i>Dechloromonas aromatica</i>              | 0.54 ± 0.02 | 0.40 ± 0.02  | 0.08 ± 0.02  | -0.10 ± 0.02 | -0.12 ± 0.02 | -0.10 ± 0.02 | -0.10 ± 0.02 | -0.10 ± 0.02 | -0.11 ± 0.02 | -0.13 ± 0.02 | -0.12 ± 0.02 | -0.14 ± 0.02 | -0.14 ± 0.02 |
| Bacteria | <i>Dehalococcoides ethenogenes</i>          | 0.26 ± 0.02 | 0.14 ± 0.03  | 0.04 ± 0.03  | -0.12 ± 0.03 | -0.22 ± 0.03 | -0.22 ± 0.03 | -0.15 ± 0.03 | -0.14 ± 0.03 | -0.18 ± 0.03 | -0.13 ± 0.03 | -0.18 ± 0.03 | -0.17 ± 0.03 | -0.19 ± 0.03 |
| Bacteria | <i>Deinococcus deserti</i>                  | 0.54 ± 0.02 | 0.47 ± 0.02  | 0.18 ± 0.02  | 0.05 ± 0.02  | -0.02 ± 0.02 | -0.05 ± 0.02 | -0.08 ± 0.02 | -0.03 ± 0.02 | -0.06 ± 0.02 | -0.04 ± 0.02 | -0.03 ± 0.02 | -0.03 ± 0.02 | -0.05 ± 0.02 |
| Bacteria | <i>Delftia acidovorans</i>                  | 0.77 ± 0.01 | 0.58 ± 0.01  | 0.24 ± 0.01  | 0.08 ± 0.01  | 0.03 ± 0.01  | -0.01 ± 0.01 | -0.04 ± 0.01 | -0.08 ± 0.01 | -0.11 ± 0.01 | -0.12 ± 0.01 | -0.13 ± 0.01 | -0.13 ± 0.01 | -0.16 ± 0.01 |

Continued on next page

| Type     | Species                                 | Window 1     | Window 2     | Window 3     | Window 4     | Window 5     | Window 6     | Window 7     | Window 8     | Window 9     | Window 10    | Window 11    | Window 12    | Window 13    |
|----------|-----------------------------------------|--------------|--------------|--------------|--------------|--------------|--------------|--------------|--------------|--------------|--------------|--------------|--------------|--------------|
| Bacteria | <i>Desulfatibacillum alkenivorans</i>   | 0.51 ± 0.01  | 0.38 ± 0.01  | 0.16 ± 0.01  | 0.00 ± 0.01  | -0.05 ± 0.01 | -0.10 ± 0.01 | -0.11 ± 0.01 | -0.14 ± 0.01 | -0.16 ± 0.01 | -0.13 ± 0.01 | -0.15 ± 0.01 | -0.17 ± 0.01 | -0.17 ± 0.01 |
| Bacteria | <i>Desulfotobacterium hafniense</i>     | 0.28 ± 0.01  | 0.16 ± 0.01  | 0.07 ± 0.02  | 0.02 ± 0.02  | -0.02 ± 0.02 | -0.05 ± 0.02 | -0.06 ± 0.01 | -0.06 ± 0.01 | -0.08 ± 0.01 | -0.07 ± 0.01 | -0.07 ± 0.01 | -0.07 ± 0.01 | -0.09 ± 0.01 |
| Bacteria | <i>Desulfobacterium autotrophicum</i>   | 0.33 ± 0.01  | 0.21 ± 0.01  | 0.06 ± 0.01  | -0.04 ± 0.02 | -0.06 ± 0.02 | -0.09 ± 0.02 | -0.09 ± 0.01 | -0.09 ± 0.01 | -0.11 ± 0.01 | -0.09 ± 0.01 | -0.11 ± 0.01 | -0.14 ± 0.02 | -0.11 ± 0.01 |
| Bacteria | <i>Desulfococcus oleovorans</i>         | 0.51 ± 0.02  | 0.41 ± 0.02  | 0.17 ± 0.02  | -0.02 ± 0.02 | -0.10 ± 0.02 | -0.12 ± 0.02 | -0.13 ± 0.02 | -0.09 ± 0.02 | -0.12 ± 0.02 | -0.12 ± 0.02 | -0.15 ± 0.02 | -0.14 ± 0.02 | -0.14 ± 0.02 |
| Bacteria | <i>Desulfotalea psychrophila</i>        | 0.30 ± 0.02  | 0.23 ± 0.02  | 0.12 ± 0.02  | -0.02 ± 0.02 | -0.02 ± 0.02 | -0.03 ± 0.02 | -0.07 ± 0.02 | -0.06 ± 0.02 | -0.07 ± 0.02 | -0.07 ± 0.02 | -0.08 ± 0.02 | -0.10 ± 0.02 | -0.10 ± 0.02 |
| Bacteria | <i>Desulfotomaculum reducens</i>        | 0.11 ± 0.02  | 0.04 ± 0.02  | -0.07 ± 0.02 | -0.07 ± 0.02 | -0.10 ± 0.02 | -0.08 ± 0.02 | -0.06 ± 0.02 | -0.09 ± 0.02 | -0.13 ± 0.02 | -0.10 ± 0.02 | -0.10 ± 0.02 | -0.08 ± 0.02 | -0.08 ± 0.02 |
| Bacteria | <i>Desulfovibrio desulfuricans</i>      | 0.38 ± 0.02  | 0.22 ± 0.02  | -0.03 ± 0.02 | -0.13 ± 0.02 | -0.16 ± 0.02 | -0.19 ± 0.02 | -0.17 ± 0.02 | -0.17 ± 0.02 | -0.16 ± 0.02 | -0.14 ± 0.02 | -0.12 ± 0.02 | -0.18 ± 0.02 | -0.15 ± 0.02 |
| Bacteria | <i>Diaphorobacter sp. TPSY</i>          | 0.85 ± 0.02  | 0.68 ± 0.02  | 0.24 ± 0.02  | 0.01 ± 0.02  | 0.01 ± 0.02  | -0.06 ± 0.02 | -0.07 ± 0.02 | -0.09 ± 0.02 | -0.13 ± 0.02 | -0.15 ± 0.02 | -0.17 ± 0.02 | -0.18 ± 0.02 | -0.16 ± 0.02 |
| Bacteria | <i>Dichelobacter nodosus</i>            | 0.17 ± 0.03  | 0.05 ± 0.03  | -0.12 ± 0.03 | -0.10 ± 0.03 | -0.14 ± 0.03 | -0.17 ± 0.03 | -0.13 ± 0.03 | -0.11 ± 0.03 | -0.12 ± 0.03 | -0.12 ± 0.03 | -0.12 ± 0.03 | -0.13 ± 0.03 | -0.12 ± 0.03 |
| Bacteria | <i>Dickeya dadantii</i>                 | 0.51 ± 0.02  | 0.37 ± 0.02  | 0.05 ± 0.02  | 0.00 ± 0.02  | -0.02 ± 0.02 | -0.02 ± 0.02 | -0.08 ± 0.02 | -0.04 ± 0.02 | -0.04 ± 0.02 | -0.09 ± 0.02 | -0.10 ± 0.02 | -0.11 ± 0.02 | -0.08 ± 0.02 |
| Bacteria | <i>Dictyoglomus thermophilum</i>        | -0.01 ± 0.02 | 0.07 ± 0.02  | 0.03 ± 0.02  | -0.03 ± 0.02 | -0.08 ± 0.02 | -0.11 ± 0.03 | -0.12 ± 0.03 | -0.14 ± 0.03 | -0.08 ± 0.02 | -0.09 ± 0.02 | -0.08 ± 0.02 | -0.05 ± 0.02 | -0.05 ± 0.02 |
| Bacteria | <i>Dinoroseobacter shibae</i>           | 0.67 ± 0.02  | 0.49 ± 0.02  | 0.17 ± 0.02  | 0.03 ± 0.02  | 0.01 ± 0.02  | -0.01 ± 0.02 | -0.03 ± 0.02 | -0.04 ± 0.02 | -0.05 ± 0.02 | -0.10 ± 0.02 | -0.08 ± 0.02 | -0.06 ± 0.02 | -0.06 ± 0.02 |
| Bacteria | <i>Eduardsiella ictaluri</i>            | 0.46 ± 0.02  | 0.34 ± 0.02  | 0.09 ± 0.02  | -0.01 ± 0.02 | -0.04 ± 0.02 | -0.04 ± 0.02 | -0.02 ± 0.02 | -0.03 ± 0.02 | -0.06 ± 0.02 | -0.06 ± 0.02 | -0.11 ± 0.02 | -0.11 ± 0.02 | -0.12 ± 0.02 |
| Bacteria | <i>Ehrlichia canis</i>                  | 0.01 ± 0.03  | -0.02 ± 0.03 | -0.15 ± 0.04 | -0.14 ± 0.04 | -0.13 ± 0.04 | -0.14 ± 0.04 | -0.09 ± 0.03 | -0.03 ± 0.03 | -0.06 ± 0.03 | -0.05 ± 0.03 | -0.04 ± 0.03 | -0.07 ± 0.03 | -0.07 ± 0.03 |
| Bacteria | <i>Elusimicrobium minutum</i>           | 0.25 ± 0.02  | 0.14 ± 0.02  | -0.03 ± 0.03 | -0.16 ± 0.03 | -0.29 ± 0.03 | -0.30 ± 0.03 | -0.24 ± 0.03 | -0.21 ± 0.03 | -0.20 ± 0.03 | -0.19 ± 0.03 | -0.19 ± 0.03 | -0.21 ± 0.03 | -0.17 ± 0.03 |
| Bacteria | <i>Enterobacter sp. 638</i>             | 0.43 ± 0.02  | 0.31 ± 0.02  | 0.01 ± 0.02  | -0.06 ± 0.02 | -0.06 ± 0.02 | -0.05 ± 0.02 | -0.04 ± 0.02 | -0.03 ± 0.02 | -0.04 ± 0.02 | -0.10 ± 0.02 | -0.09 ± 0.02 | -0.10 ± 0.02 | -0.12 ± 0.02 |
| Bacteria | <i>Enterococcus faecalis</i>            | 0.15 ± 0.02  | 0.05 ± 0.02  | -0.04 ± 0.02 | -0.07 ± 0.02 | -0.11 ± 0.02 | -0.12 ± 0.02 | -0.10 ± 0.02 | -0.07 ± 0.02 | -0.10 ± 0.02 | -0.09 ± 0.02 | -0.03 ± 0.02 | -0.05 ± 0.02 | -0.09 ± 0.02 |
| Bacteria | <i>Erwinia tasmaniensis</i>             | 0.47 ± 0.02  | 0.33 ± 0.02  | 0.07 ± 0.02  | 0.00 ± 0.02  | -0.04 ± 0.02 | -0.06 ± 0.02 | -0.06 ± 0.02 | -0.03 ± 0.02 | -0.05 ± 0.02 | -0.05 ± 0.02 | -0.10 ± 0.02 | -0.09 ± 0.02 | -0.07 ± 0.02 |
| Bacteria | <i>Erythrobacter litoralis</i>          | 0.51 ± 0.02  | 0.40 ± 0.02  | 0.10 ± 0.02  | -0.09 ± 0.02 | -0.11 ± 0.02 | -0.13 ± 0.02 | -0.09 ± 0.02 | -0.12 ± 0.02 | -0.11 ± 0.02 | -0.08 ± 0.02 | -0.09 ± 0.02 | -0.12 ± 0.02 | -0.13 ± 0.02 |
| Bacteria | <i>Escherichia coli</i>                 | 0.35 ± 0.01  | 0.20 ± 0.02  | -0.06 ± 0.02 | -0.11 ± 0.02 | -0.05 ± 0.02 | -0.06 ± 0.02 | -0.08 ± 0.02 | -0.08 ± 0.02 | -0.08 ± 0.02 | -0.09 ± 0.02 | -0.09 ± 0.02 | -0.10 ± 0.02 | -0.07 ± 0.02 |
| Bacteria | <i>Eubacterium eligens</i>              | 0.21 ± 0.02  | 0.06 ± 0.02  | -0.14 ± 0.03 | -0.16 ± 0.03 | -0.15 ± 0.03 | -0.16 ± 0.02 | -0.14 ± 0.02 | -0.17 ± 0.03 | -0.16 ± 0.02 | -0.18 ± 0.02 | -0.16 ± 0.02 | -0.15 ± 0.03 | -0.15 ± 0.02 |
| Bacteria | <i>Exiguobacterium sibiricum</i>        | 0.41 ± 0.02  | 0.26 ± 0.02  | 0.05 ± 0.02  | 0.00 ± 0.02  | -0.03 ± 0.02 | -0.03 ± 0.02 | -0.03 ± 0.02 | -0.06 ± 0.02 | -0.03 ± 0.02 | -0.06 ± 0.02 | -0.08 ± 0.02 | -0.09 ± 0.02 | -0.12 ± 0.02 |
| Bacteria | <i>Fervidobacterium nodosum</i>         | 0.02 ± 0.02  | 0.03 ± 0.02  | -0.05 ± 0.03 | -0.06 ± 0.03 | -0.01 ± 0.02 | -0.02 ± 0.02 | 0.01 ± 0.02  | -0.03 ± 0.03 | -0.08 ± 0.03 | -0.07 ± 0.02 | -0.06 ± 0.03 | -0.03 ± 0.03 | -0.03 ± 0.02 |
| Bacteria | <i>Fingoldia magna</i>                  | 0.15 ± 0.03  | 0.04 ± 0.03  | -0.10 ± 0.03 | -0.14 ± 0.03 | -0.13 ± 0.03 | -0.12 ± 0.03 | -0.13 ± 0.03 | -0.15 ± 0.03 | -0.13 ± 0.03 | -0.05 ± 0.03 | -0.13 ± 0.03 | -0.13 ± 0.03 | -0.07 ± 0.03 |
| Bacteria | <i>Flavobacterium johnsoniae</i>        | 0.26 ± 0.01  | 0.10 ± 0.01  | -0.15 ± 0.02 | -0.25 ± 0.02 | -0.25 ± 0.02 | -0.17 ± 0.02 | -0.17 ± 0.02 | -0.18 ± 0.02 | -0.15 ± 0.02 | -0.14 ± 0.02 | -0.14 ± 0.02 | -0.14 ± 0.02 | -0.13 ± 0.02 |
| Bacteria | <i>Francisella novicida</i>             | 0.17 ± 0.02  | 0.05 ± 0.02  | -0.13 ± 0.03 | -0.15 ± 0.03 | -0.16 ± 0.03 | -0.14 ± 0.03 | -0.16 ± 0.03 | -0.12 ± 0.03 | -0.12 ± 0.03 | -0.11 ± 0.03 | -0.08 ± 0.03 | -0.05 ± 0.02 | -0.06 ± 0.02 |
| Bacteria | <i>Frankia alni</i>                     | 0.27 ± 0.01  | 0.22 ± 0.01  | 0.11 ± 0.01  | 0.04 ± 0.01  | 0.02 ± 0.01  | -0.02 ± 0.01 | -0.03 ± 0.01 | -0.03 ± 0.01 | -0.05 ± 0.01 | -0.06 ± 0.01 | -0.05 ± 0.01 | -0.05 ± 0.01 | -0.05 ± 0.01 |
| Bacteria | <i>Fusobacterium nucleatum</i>          | 0.05 ± 0.02  | -0.01 ± 0.02 | -0.07 ± 0.02 | -0.03 ± 0.02 | -0.04 ± 0.02 | -0.06 ± 0.02 | -0.08 ± 0.02 | -0.10 ± 0.02 | -0.10 ± 0.02 | -0.05 ± 0.02 | -0.08 ± 0.02 | -0.08 ± 0.02 | -0.02 ± 0.02 |
| Bacteria | <i>Gemmatimonas aurantiaca</i>          | 0.40 ± 0.02  | 0.29 ± 0.02  | 0.04 ± 0.02  | -0.05 ± 0.02 | -0.07 ± 0.02 | -0.07 ± 0.02 | -0.07 ± 0.02 | -0.07 ± 0.02 | -0.09 ± 0.02 | -0.12 ± 0.02 | -0.10 ± 0.02 | -0.12 ± 0.02 | -0.14 ± 0.02 |
| Bacteria | <i>Geobacillus kaustophilus</i>         | 0.26 ± 0.02  | 0.18 ± 0.02  | 0.01 ± 0.02  | 0.00 ± 0.02  | -0.03 ± 0.02 | -0.06 ± 0.02 | -0.03 ± 0.02 | -0.06 ± 0.02 | -0.06 ± 0.02 | -0.07 ± 0.02 | -0.06 ± 0.02 | -0.10 ± 0.02 | -0.09 ± 0.02 |
| Bacteria | <i>Geobacter bemidjiensis</i>           | 0.63 ± 0.02  | 0.51 ± 0.02  | 0.27 ± 0.02  | 0.10 ± 0.02  | 0.01 ± 0.02  | 0.01 ± 0.02  | -0.01 ± 0.02 | -0.03 ± 0.02 | -0.04 ± 0.02 | -0.05 ± 0.02 | -0.03 ± 0.02 | -0.04 ± 0.02 | -0.05 ± 0.02 |
| Bacteria | <i>Gloeobacter violaceus</i>            | 0.48 ± 0.01  | 0.43 ± 0.02  | 0.22 ± 0.02  | 0.09 ± 0.02  | 0.01 ± 0.02  | 0.02 ± 0.02  | 0.01 ± 0.02  | -0.01 ± 0.02 | -0.02 ± 0.02 | -0.04 ± 0.02 | -0.03 ± 0.02 | -0.05 ± 0.02 | -0.06 ± 0.02 |
| Bacteria | <i>Gluconacetobacter diazotrophicus</i> | 0.64 ± 0.02  | 0.47 ± 0.02  | 0.21 ± 0.02  | 0.11 ± 0.02  | 0.05 ± 0.02  | 0.00 ± 0.02  | -0.02 ± 0.02 | -0.03 ± 0.02 | -0.06 ± 0.02 | -0.08 ± 0.02 | -0.07 ± 0.02 | -0.10 ± 0.02 | -0.09 ± 0.02 |
| Bacteria | <i>Gluconobacter oxydans</i>            | 0.48 ± 0.02  | 0.35 ± 0.02  | 0.09 ± 0.02  | 0.04 ± 0.02  | -0.01 ± 0.02 | 0.01 ± 0.02  | -0.04 ± 0.02 | -0.05 ± 0.02 | -0.08 ± 0.02 | -0.09 ± 0.02 | -0.09 ± 0.02 | -0.06 ± 0.02 | -0.11 ± 0.02 |
| Bacteria | <i>Gramella forsetii</i>                | 0.23 ± 0.02  | 0.09 ± 0.02  | -0.13 ± 0.02 | -0.25 ± 0.02 | -0.29 ± 0.02 | -0.22 ± 0.02 | -0.18 ± 0.02 | -0.16 ± 0.02 | -0.17 ± 0.02 | -0.20 ± 0.02 | -0.15 ± 0.02 | -0.16 ± 0.02 | -0.12 ± 0.02 |
| Bacteria | <i>Granulibacter bethesdensis</i>       | 0.30 ± 0.02  | 0.24 ± 0.02  | 0.12 ± 0.02  | 0.00 ± 0.02  | -0.02 ± 0.02 | -0.02 ± 0.02 | -0.04 ± 0.02 | -0.04 ± 0.02 | -0.07 ± 0.02 | -0.07 ± 0.02 | -0.11 ± 0.02 | -0.07 ± 0.02 | -0.07 ± 0.02 |
| Bacteria | <i>Haemophilus ducreyi</i>              | 0.13 ± 0.03  | -0.02 ± 0.03 | -0.14 ± 0.03 | -0.16 ± 0.03 | -0.14 ± 0.03 | -0.16 ± 0.03 | -0.14 ± 0.03 | -0.14 ± 0.03 | -0.08 ± 0.03 | -0.06 ± 0.03 | -0.10 ± 0.03 | -0.09 ± 0.03 | -0.10 ± 0.03 |
| Bacteria | <i>Hahella chejuensis</i>               | 0.38 ± 0.01  | 0.30 ± 0.01  | 0.08 ± 0.01  | 0.01 ± 0.01  | -0.02 ± 0.01 | -0.06 ± 0.01 | -0.07 ± 0.01 | -0.08 ± 0.01 | -0.09 ± 0.01 | -0.10 ± 0.01 | -0.10 ± 0.01 | -0.11 ± 0.01 | -0.08 ± 0.01 |
| Bacteria | <i>Halorhodospira halophila</i>         | 0.58 ± 0.02  | 0.46 ± 0.02  | 0.13 ± 0.02  | -0.04 ± 0.02 | -0.13 ± 0.02 | -0.14 ± 0.02 | -0.12 ± 0.02 | -0.10 ± 0.02 | -0.11 ± 0.02 | -0.11 ± 0.02 | -0.15 ± 0.02 | -0.14 ± 0.02 | -0.12 ± 0.02 |

Continued on next page

| Type     | Species                                  | Window 1     | Window 2     | Window 3     | Window 4     | Window 5     | Window 6     | Window 7     | Window 8     | Window 9     | Window 10    | Window 11    | Window 12    | Window 13    |
|----------|------------------------------------------|--------------|--------------|--------------|--------------|--------------|--------------|--------------|--------------|--------------|--------------|--------------|--------------|--------------|
| Bacteria | <i>Halothermothrix orenii</i>            | 0.13 ± 0.02  | 0.08 ± 0.02  | -0.02 ± 0.02 | 0.00 ± 0.02  | -0.06 ± 0.02 | -0.07 ± 0.02 | -0.03 ± 0.02 | -0.09 ± 0.02 | -0.08 ± 0.02 | -0.10 ± 0.02 | -0.16 ± 0.02 | -0.13 ± 0.02 | -0.11 ± 0.02 |
| Bacteria | <i>Helicobacter acinonychis</i>          | 0.19 ± 0.02  | 0.16 ± 0.02  | 0.02 ± 0.03  | -0.04 ± 0.03 | -0.05 ± 0.03 | -0.08 ± 0.03 | -0.01 ± 0.03 | -0.02 ± 0.03 | -0.08 ± 0.03 | -0.06 ± 0.03 | -0.05 ± 0.03 | -0.05 ± 0.03 | -0.01 ± 0.03 |
| Bacteria | <i>Helibacterium modesticaldum</i>       | 0.28 ± 0.02  | 0.15 ± 0.02  | 0.05 ± 0.02  | 0.03 ± 0.02  | -0.01 ± 0.02 | -0.01 ± 0.02 | -0.01 ± 0.02 | -0.04 ± 0.02 | -0.05 ± 0.02 | -0.04 ± 0.02 | -0.04 ± 0.02 | -0.04 ± 0.02 | -0.02 ± 0.02 |
| Bacteria | <i>Herminiimonas arsenicozydans</i>      | 0.51 ± 0.02  | 0.37 ± 0.02  | 0.16 ± 0.02  | -0.04 ± 0.02 | -0.06 ± 0.02 | -0.10 ± 0.02 | -0.13 ± 0.02 | -0.12 ± 0.02 | -0.15 ± 0.02 | -0.15 ± 0.02 | -0.16 ± 0.02 | -0.16 ± 0.02 | -0.14 ± 0.02 |
| Bacteria | <i>Herpetosiphon aurantiacus</i>         | 0.30 ± 0.01  | 0.19 ± 0.01  | 0.02 ± 0.02  | -0.03 ± 0.02 | -0.05 ± 0.02 | -0.07 ± 0.02 | -0.09 ± 0.02 | -0.08 ± 0.02 | -0.07 ± 0.02 | -0.07 ± 0.01 | -0.08 ± 0.01 | -0.08 ± 0.01 | -0.09 ± 0.01 |
| Bacteria | <i>Hydrogenobaculum sp. Y04AAS1</i>      | -0.03 ± 0.03 | -0.03 ± 0.03 | -0.12 ± 0.03 | -0.13 ± 0.03 | -0.20 ± 0.03 | -0.19 ± 0.03 | -0.19 ± 0.03 | -0.12 ± 0.03 | -0.13 ± 0.03 | -0.09 ± 0.03 | -0.08 ± 0.03 | -0.08 ± 0.03 | -0.06 ± 0.02 |
| Bacteria | <i>Hyphomonas neptunium</i>              | 0.57 ± 0.02  | 0.43 ± 0.02  | 0.10 ± 0.02  | -0.09 ± 0.02 | -0.11 ± 0.02 | -0.10 ± 0.02 | -0.09 ± 0.02 | -0.08 ± 0.02 | -0.12 ± 0.02 | -0.11 ± 0.02 | -0.10 ± 0.02 | -0.11 ± 0.02 | -0.12 ± 0.02 |
| Bacteria | <i>Idiomarina loihiensis</i>             | 0.26 ± 0.02  | 0.14 ± 0.02  | -0.11 ± 0.02 | -0.25 ± 0.02 | -0.22 ± 0.02 | -0.16 ± 0.02 | -0.15 ± 0.02 | -0.13 ± 0.02 | -0.15 ± 0.02 | -0.19 ± 0.02 | -0.18 ± 0.02 | -0.15 ± 0.02 | -0.15 ± 0.02 |
| Bacteria | <i>Jannaschia sp. CCS1</i>               | 0.61 ± 0.01  | 0.46 ± 0.02  | 0.15 ± 0.02  | 0.00 ± 0.02  | -0.03 ± 0.02 | -0.05 ± 0.02 | -0.02 ± 0.02 | -0.02 ± 0.02 | -0.04 ± 0.02 | -0.04 ± 0.02 | -0.05 ± 0.02 | -0.03 ± 0.02 | -0.04 ± 0.02 |
| Bacteria | <i>Janthinobacterium sp. Marseille</i>   | 0.54 ± 0.02  | 0.39 ± 0.02  | 0.12 ± 0.02  | -0.08 ± 0.02 | -0.08 ± 0.02 | -0.09 ± 0.02 | -0.08 ± 0.02 | -0.12 ± 0.02 | -0.12 ± 0.02 | -0.12 ± 0.02 | -0.13 ± 0.02 | -0.16 ± 0.02 | -0.14 ± 0.02 |
| Bacteria | <i>Kineococcus radiotolerans</i>         | 0.44 ± 0.02  | 0.37 ± 0.02  | 0.16 ± 0.02  | 0.09 ± 0.02  | 0.04 ± 0.02  | 0.02 ± 0.02  | -0.01 ± 0.02 | -0.02 ± 0.02 | -0.02 ± 0.02 | -0.04 ± 0.02 | -0.06 ± 0.02 | -0.04 ± 0.02 | -0.05 ± 0.02 |
| Bacteria | <i>Klebsiella pneumoniae</i>             | 0.60 ± 0.01  | 0.42 ± 0.01  | 0.13 ± 0.02  | 0.04 ± 0.02  | 0.01 ± 0.02  | -0.01 ± 0.02 | -0.03 ± 0.02 | -0.05 ± 0.01 | -0.05 ± 0.01 | -0.09 ± 0.01 | -0.08 ± 0.01 | -0.09 ± 0.01 | -0.08 ± 0.01 |
| Bacteria | <i>Kocuria rhizophila</i>                | 0.60 ± 0.02  | 0.50 ± 0.02  | 0.19 ± 0.02  | 0.06 ± 0.02  | -0.03 ± 0.02 | -0.06 ± 0.02 | -0.04 ± 0.02 | -0.06 ± 0.02 | -0.06 ± 0.02 | -0.10 ± 0.02 | -0.13 ± 0.02 | -0.13 ± 0.02 | -0.14 ± 0.02 |
| Bacteria | <i>Kosmotoga olearia</i>                 | 0.04 ± 0.02  | 0.05 ± 0.02  | 0.02 ± 0.02  | -0.01 ± 0.02 | -0.04 ± 0.02 | -0.06 ± 0.02 | -0.11 ± 0.02 | -0.10 ± 0.02 | -0.10 ± 0.02 | -0.11 ± 0.02 | -0.06 ± 0.02 | -0.09 ± 0.02 | -0.07 ± 0.02 |
| Bacteria | <i>Lactobacillus acidophilus</i>         | 0.15 ± 0.02  | 0.04 ± 0.03  | -0.14 ± 0.03 | -0.11 ± 0.03 | -0.16 ± 0.03 | -0.14 ± 0.03 | -0.11 ± 0.02 | -0.10 ± 0.02 | -0.09 ± 0.02 | -0.09 ± 0.02 | -0.12 ± 0.03 | -0.09 ± 0.02 | -0.09 ± 0.02 |
| Bacteria | <i>Lactococcus lactis</i>                | 0.19 ± 0.02  | 0.03 ± 0.02  | -0.19 ± 0.02 | -0.19 ± 0.02 | -0.13 ± 0.02 | -0.15 ± 0.02 | -0.12 ± 0.02 | -0.13 ± 0.02 | -0.14 ± 0.02 | -0.08 ± 0.02 | -0.10 ± 0.02 | -0.13 ± 0.02 | -0.14 ± 0.02 |
| Bacteria | <i>Laribacter hongkongensis</i>          | 0.58 ± 0.02  | 0.42 ± 0.02  | 0.06 ± 0.02  | -0.04 ± 0.02 | -0.08 ± 0.02 | -0.09 ± 0.02 | -0.14 ± 0.02 | -0.12 ± 0.02 | -0.12 ± 0.02 | -0.10 ± 0.02 | -0.10 ± 0.02 | -0.15 ± 0.02 | -0.14 ± 0.02 |
| Bacteria | <i>Lawsonia intracellularis</i>          | -0.07 ± 0.03 | -0.04 ± 0.03 | -0.12 ± 0.03 | -0.18 ± 0.03 | -0.18 ± 0.03 | -0.13 ± 0.03 | -0.10 ± 0.03 | -0.06 ± 0.03 | -0.07 ± 0.03 | -0.06 ± 0.03 | -0.02 ± 0.03 | -0.08 ± 0.03 | -0.09 ± 0.03 |
| Bacteria | <i>Legionella pneumophila</i>            | 0.14 ± 0.02  | 0.09 ± 0.02  | -0.02 ± 0.02 | -0.08 ± 0.02 | -0.12 ± 0.02 | -0.11 ± 0.02 | -0.06 ± 0.02 | -0.08 ± 0.02 | -0.09 ± 0.02 | -0.08 ± 0.02 | -0.06 ± 0.02 | -0.05 ± 0.02 | -0.07 ± 0.02 |
| Bacteria | <i>Leifsonia zylli</i>                   | 0.45 ± 0.02  | 0.31 ± 0.02  | 0.10 ± 0.03  | 0.07 ± 0.02  | 0.02 ± 0.02  | 0.03 ± 0.02  | -0.01 ± 0.02 | 0.01 ± 0.02  | 0.03 ± 0.02  | -0.02 ± 0.02 | -0.06 ± 0.02 | -0.08 ± 0.02 | -0.02 ± 0.02 |
| Bacteria | <i>Leptospira biflexa</i>                | 0.14 ± 0.02  | 0.10 ± 0.02  | -0.05 ± 0.02 | -0.23 ± 0.02 | -0.30 ± 0.02 | -0.25 ± 0.02 | -0.19 ± 0.02 | -0.18 ± 0.02 | -0.15 ± 0.02 | -0.16 ± 0.02 | -0.18 ± 0.02 | -0.18 ± 0.02 | -0.19 ± 0.02 |
| Bacteria | <i>Leptothrix cholodnii</i>              | 0.87 ± 0.02  | 0.68 ± 0.02  | 0.24 ± 0.02  | 0.06 ± 0.02  | 0.02 ± 0.02  | -0.03 ± 0.02 | -0.08 ± 0.02 | -0.11 ± 0.02 | -0.14 ± 0.02 | -0.15 ± 0.02 | -0.13 ± 0.02 | -0.14 ± 0.02 | -0.15 ± 0.02 |
| Bacteria | <i>Leuconostoc citreum</i>               | 0.23 ± 0.02  | 0.12 ± 0.02  | -0.11 ± 0.03 | -0.12 ± 0.03 | -0.12 ± 0.03 | -0.13 ± 0.03 | -0.13 ± 0.03 | -0.11 ± 0.03 | -0.11 ± 0.03 | -0.13 ± 0.02 | -0.11 ± 0.03 | -0.16 ± 0.03 | -0.10 ± 0.03 |
| Bacteria | <i>Listeria innocua</i>                  | 0.17 ± 0.02  | 0.15 ± 0.02  | 0.03 ± 0.02  | -0.02 ± 0.02 | -0.02 ± 0.02 | -0.02 ± 0.02 | -0.01 ± 0.02 | -0.01 ± 0.02 | -0.02 ± 0.02 | 0.01 ± 0.02  | 0.01 ± 0.02  | 0.02 ± 0.02  | -0.01 ± 0.02 |
| Bacteria | <i>Lysinibacillus sphaericus</i>         | 0.09 ± 0.01  | 0.09 ± 0.01  | 0.02 ± 0.02  | 0.00 ± 0.02  | -0.05 ± 0.02 | -0.07 ± 0.02 | -0.05 ± 0.02 | -0.03 ± 0.02 | -0.06 ± 0.02 | -0.05 ± 0.02 | -0.05 ± 0.02 | -0.05 ± 0.02 | -0.06 ± 0.02 |
| Bacteria | <i>Macrocooccus caseolyticus</i>         | 0.23 ± 0.02  | 0.17 ± 0.02  | 0.06 ± 0.02  | 0.00 ± 0.02  | -0.02 ± 0.02 | -0.01 ± 0.02 | -0.07 ± 0.02 | -0.03 ± 0.02 | -0.07 ± 0.02 | -0.03 ± 0.02 | -0.05 ± 0.02 | -0.09 ± 0.02 | -0.10 ± 0.02 |
| Bacteria | <i>Magnetococcus sp. MC-1</i>            | 0.31 ± 0.02  | 0.21 ± 0.02  | 0.01 ± 0.02  | -0.12 ± 0.02 | -0.14 ± 0.02 | -0.12 ± 0.02 | -0.07 ± 0.02 | -0.10 ± 0.02 | -0.11 ± 0.02 | -0.13 ± 0.02 | -0.08 ± 0.02 | -0.14 ± 0.02 | -0.15 ± 0.02 |
| Bacteria | <i>Magnetospirillum magneticum</i>       | 0.46 ± 0.02  | 0.40 ± 0.02  | 0.17 ± 0.02  | 0.00 ± 0.02  | -0.04 ± 0.02 | -0.04 ± 0.02 | -0.06 ± 0.02 | -0.06 ± 0.02 | -0.09 ± 0.02 | -0.11 ± 0.02 | -0.12 ± 0.02 | -0.13 ± 0.02 | -0.12 ± 0.02 |
| Bacteria | <i>Mannheimia succiniciproducens</i>     | 0.25 ± 0.02  | 0.14 ± 0.02  | -0.05 ± 0.02 | -0.06 ± 0.02 | -0.10 ± 0.02 | -0.12 ± 0.02 | -0.14 ± 0.02 | -0.12 ± 0.02 | -0.12 ± 0.02 | -0.10 ± 0.02 | -0.14 ± 0.02 | -0.14 ± 0.02 | -0.13 ± 0.02 |
| Bacteria | <i>Maricaulis maris</i>                  | 0.55 ± 0.02  | 0.43 ± 0.02  | 0.11 ± 0.02  | -0.01 ± 0.02 | -0.08 ± 0.02 | -0.09 ± 0.02 | -0.08 ± 0.02 | -0.11 ± 0.02 | -0.14 ± 0.02 | -0.13 ± 0.02 | -0.17 ± 0.02 | -0.12 ± 0.02 | -0.12 ± 0.02 |
| Bacteria | <i>Marinobacter aquaeolei</i>            | 0.45 ± 0.02  | 0.33 ± 0.02  | 0.06 ± 0.02  | -0.06 ± 0.02 | -0.08 ± 0.02 | -0.10 ± 0.02 | -0.11 ± 0.02 | -0.11 ± 0.02 | -0.07 ± 0.02 | -0.11 ± 0.02 | -0.15 ± 0.02 | -0.10 ± 0.02 | -0.11 ± 0.02 |
| Bacteria | <i>Marinomonas sp. MWYL1</i>             | 0.21 ± 0.01  | 0.09 ± 0.02  | -0.11 ± 0.02 | -0.21 ± 0.02 | -0.17 ± 0.02 | -0.19 ± 0.02 | -0.13 ± 0.02 | -0.13 ± 0.02 | -0.12 ± 0.02 | -0.10 ± 0.02 | -0.10 ± 0.02 | -0.11 ± 0.02 | -0.12 ± 0.02 |
| Bacteria | <i>Mesoplasma florum</i>                 | 0.11 ± 0.08  | -0.07 ± 0.10 | -0.39 ± 0.11 | -0.31 ± 0.11 | -0.25 ± 0.16 | -0.17 ± 0.09 | -0.33 ± 0.16 | -0.48 ± 0.26 | -0.20 ± 0.11 | -0.21 ± 0.11 | -0.15 ± 0.10 | -0.12 ± 0.09 | -0.17 ± 0.10 |
| Bacteria | <i>Mesorhizobium loti</i>                | 0.45 ± 0.01  | 0.38 ± 0.01  | 0.15 ± 0.01  | 0.00 ± 0.01  | -0.04 ± 0.01 | -0.08 ± 0.01 | -0.09 ± 0.01 | -0.09 ± 0.01 | -0.09 ± 0.01 | -0.10 ± 0.01 | -0.10 ± 0.01 | -0.08 ± 0.01 | -0.11 ± 0.01 |
| Bacteria | <i>Methylacidiphilum infernorum</i>      | 0.09 ± 0.02  | 0.11 ± 0.02  | 0.06 ± 0.02  | 0.01 ± 0.02  | -0.06 ± 0.02 | -0.06 ± 0.02 | -0.04 ± 0.02 | -0.07 ± 0.02 | -0.04 ± 0.02 | -0.06 ± 0.02 | -0.07 ± 0.02 | -0.07 ± 0.02 | -0.06 ± 0.02 |
| Bacteria | <i>Methylibium petroleiphilum</i>        | 0.74 ± 0.02  | 0.61 ± 0.02  | 0.21 ± 0.02  | 0.04 ± 0.02  | -0.04 ± 0.02 | -0.05 ± 0.02 | -0.10 ± 0.02 | -0.11 ± 0.02 | -0.14 ± 0.02 | -0.14 ± 0.02 | -0.09 ± 0.02 | -0.12 ± 0.02 | -0.11 ± 0.02 |
| Bacteria | <i>Methylobacillus flagellatus</i>       | 0.46 ± 0.02  | 0.31 ± 0.02  | 0.06 ± 0.02  | -0.06 ± 0.02 | -0.11 ± 0.02 | -0.11 ± 0.02 | -0.08 ± 0.02 | -0.15 ± 0.02 | -0.15 ± 0.02 | -0.13 ± 0.02 | -0.15 ± 0.02 | -0.10 ± 0.02 | -0.09 ± 0.02 |
| Bacteria | <i>Methylobacterium chloromethanicum</i> | 0.58 ± 0.01  | 0.45 ± 0.01  | 0.18 ± 0.02  | 0.01 ± 0.02  | -0.03 ± 0.01 | -0.05 ± 0.01 | -0.05 ± 0.01 | -0.06 ± 0.01 | -0.09 ± 0.01 | -0.09 ± 0.01 | -0.06 ± 0.01 | -0.09 ± 0.01 | -0.08 ± 0.01 |
| Bacteria | <i>Methylocella silvestris</i>           | 0.45 ± 0.02  | 0.36 ± 0.02  | 0.11 ± 0.02  | 0.02 ± 0.02  | -0.04 ± 0.02 | -0.07 ± 0.02 | -0.11 ± 0.02 | -0.08 ± 0.02 | -0.07 ± 0.02 | -0.06 ± 0.02 | -0.09 ± 0.02 | -0.11 ± 0.02 | -0.11 ± 0.02 |

Continued on next page

| Type     | Species                                | Window 1     | Window 2     | Window 3     | Window 4     | Window 5     | Window 6     | Window 7     | Window 8     | Window 9     | Window 10    | Window 11    | Window 12    | Window 13    |
|----------|----------------------------------------|--------------|--------------|--------------|--------------|--------------|--------------|--------------|--------------|--------------|--------------|--------------|--------------|--------------|
| Bacteria | <i>Methylococcus capsulatus</i>        | 0.48 ± 0.02  | 0.36 ± 0.02  | 0.10 ± 0.02  | 0.01 ± 0.02  | 0.00 ± 0.02  | -0.04 ± 0.02 | -0.05 ± 0.02 | -0.03 ± 0.02 | -0.05 ± 0.02 | -0.08 ± 0.02 | -0.06 ± 0.02 | -0.06 ± 0.02 | -0.08 ± 0.02 |
| Bacteria | <i>Micrococcus luteus</i>              | 0.67 ± 0.02  | 0.50 ± 0.02  | 0.23 ± 0.02  | 0.09 ± 0.02  | 0.01 ± 0.02  | 0.00 ± 0.02  | -0.02 ± 0.02 | -0.03 ± 0.02 | -0.06 ± 0.02 | -0.06 ± 0.02 | -0.07 ± 0.02 | -0.05 ± 0.02 | -0.04 ± 0.02 |
| Bacteria | <i>Microcystis aeruginosa</i>          | 0.17 ± 0.01  | 0.15 ± 0.01  | 0.04 ± 0.01  | -0.05 ± 0.01 | -0.16 ± 0.01 | -0.14 ± 0.01 | -0.09 ± 0.01 | -0.08 ± 0.01 | -0.05 ± 0.01 | -0.03 ± 0.01 | -0.01 ± 0.01 | -0.02 ± 0.01 | -0.04 ± 0.01 |
| Bacteria | <i>Moorella thermoacetica</i>          | 0.26 ± 0.02  | 0.15 ± 0.02  | -0.04 ± 0.02 | -0.10 ± 0.02 | -0.14 ± 0.02 | -0.15 ± 0.02 | -0.14 ± 0.02 | -0.12 ± 0.02 | -0.16 ± 0.02 | -0.15 ± 0.02 | -0.16 ± 0.02 | -0.12 ± 0.02 | -0.14 ± 0.02 |
| Bacteria | <i>Mycobacterium avium</i>             | 0.38 ± 0.02  | 0.26 ± 0.02  | 0.07 ± 0.02  | 0.01 ± 0.01  | -0.01 ± 0.02 | -0.03 ± 0.01 | -0.03 ± 0.01 | -0.03 ± 0.01 | -0.07 ± 0.01 | -0.09 ± 0.01 | -0.08 ± 0.01 | -0.09 ± 0.01 | -0.07 ± 0.01 |
| Bacteria | <i>Mycoplasma agalactiae</i>           | 0.10 ± 0.07  | 0.15 ± 0.08  | -0.17 ± 0.09 | -0.26 ± 0.10 | -0.01 ± 0.08 | -0.07 ± 0.08 | -0.16 ± 0.09 | -0.22 ± 0.10 | -0.19 ± 0.08 | -0.20 ± 0.09 | -0.23 ± 0.10 | -0.16 ± 0.09 | -0.08 ± 0.09 |
| Bacteria | <i>Myzococcus xanthus</i>              | 0.55 ± 0.01  | 0.54 ± 0.01  | 0.36 ± 0.01  | 0.20 ± 0.01  | 0.11 ± 0.01  | 0.10 ± 0.01  | 0.09 ± 0.01  | 0.06 ± 0.01  | 0.03 ± 0.01  | -0.02 ± 0.01 | 0.00 ± 0.01  | -0.01 ± 0.01 | -0.03 ± 0.01 |
| Bacteria | <i>Natranaerobius thermophilus</i>     | -0.02 ± 0.02 | 0.02 ± 0.02  | -0.04 ± 0.02 | -0.04 ± 0.02 | -0.06 ± 0.02 | -0.11 ± 0.02 | -0.13 ± 0.02 | -0.05 ± 0.02 | -0.04 ± 0.02 | -0.08 ± 0.02 | -0.07 ± 0.02 | -0.09 ± 0.02 | -0.05 ± 0.02 |
| Bacteria | <i>Nautilia profundicola</i>           | 0.08 ± 0.02  | 0.02 ± 0.03  | -0.13 ± 0.03 | -0.17 ± 0.03 | -0.13 ± 0.03 | -0.12 ± 0.03 | -0.12 ± 0.03 | -0.11 ± 0.03 | -0.07 ± 0.03 | -0.11 ± 0.03 | -0.05 ± 0.03 | -0.08 ± 0.03 | -0.09 ± 0.03 |
| Bacteria | <i>Neisseria gonorrhoeae</i>           | 0.36 ± 0.02  | 0.25 ± 0.02  | 0.08 ± 0.02  | -0.04 ± 0.02 | -0.06 ± 0.03 | -0.08 ± 0.03 | -0.04 ± 0.02 | -0.08 ± 0.02 | -0.10 ± 0.02 | -0.09 ± 0.02 | -0.09 ± 0.02 | -0.07 ± 0.02 | -0.11 ± 0.02 |
| Bacteria | <i>Neorickettsia sennetsu</i>          | 0.08 ± 0.03  | 0.03 ± 0.03  | -0.09 ± 0.04 | -0.13 ± 0.04 | -0.20 ± 0.04 | -0.14 ± 0.04 | -0.15 ± 0.04 | -0.11 ± 0.04 | -0.10 ± 0.04 | -0.06 ± 0.04 | -0.11 ± 0.04 | -0.06 ± 0.04 | -0.13 ± 0.04 |
| Bacteria | <i>Nitratiruptor sp. SB155-2</i>       | 0.11 ± 0.02  | 0.08 ± 0.02  | -0.08 ± 0.03 | -0.07 ± 0.03 | -0.10 ± 0.03 | -0.11 ± 0.02 | -0.09 ± 0.02 | -0.08 ± 0.02 | -0.09 ± 0.02 | -0.07 ± 0.02 | -0.10 ± 0.02 | -0.11 ± 0.02 | -0.07 ± 0.02 |
| Bacteria | <i>Nitrobacter hamburgensis</i>        | 0.48 ± 0.02  | 0.41 ± 0.02  | 0.16 ± 0.02  | 0.00 ± 0.02  | -0.05 ± 0.02 | -0.08 ± 0.02 | -0.09 ± 0.02 | -0.07 ± 0.02 | -0.09 ± 0.02 | -0.11 ± 0.02 | -0.08 ± 0.02 | -0.11 ± 0.02 | -0.12 ± 0.02 |
| Bacteria | <i>Nitrosococcus oceanii</i>           | 0.26 ± 0.02  | 0.16 ± 0.02  | -0.02 ± 0.02 | -0.08 ± 0.02 | -0.10 ± 0.02 | -0.12 ± 0.02 | -0.08 ± 0.02 | -0.11 ± 0.02 | -0.08 ± 0.02 | -0.09 ± 0.02 | -0.09 ± 0.02 | -0.06 ± 0.02 | -0.08 ± 0.02 |
| Bacteria | <i>Nitrosomonas europaea</i>           | 0.27 ± 0.02  | 0.21 ± 0.02  | -0.01 ± 0.02 | -0.10 ± 0.02 | -0.14 ± 0.02 | -0.09 ± 0.02 | -0.10 ± 0.02 | -0.09 ± 0.02 | -0.12 ± 0.02 | -0.11 ± 0.02 | -0.19 ± 0.02 | -0.13 ± 0.02 | -0.11 ± 0.02 |
| Bacteria | <i>Nitrospira multiformis</i>          | 0.35 ± 0.02  | 0.25 ± 0.02  | 0.12 ± 0.02  | 0.02 ± 0.02  | -0.03 ± 0.02 | -0.01 ± 0.02 | -0.04 ± 0.02 | -0.03 ± 0.02 | -0.04 ± 0.02 | -0.07 ± 0.02 | -0.10 ± 0.02 | -0.08 ± 0.02 | -0.05 ± 0.02 |
| Bacteria | <i>Nocardia farcinica</i>              | 0.51 ± 0.01  | 0.36 ± 0.01  | 0.15 ± 0.01  | 0.06 ± 0.01  | 0.01 ± 0.01  | -0.01 ± 0.01 | -0.03 ± 0.01 | -0.03 ± 0.01 | -0.07 ± 0.01 | -0.07 ± 0.01 | -0.08 ± 0.01 | -0.07 ± 0.01 | -0.09 ± 0.01 |
| Bacteria | <i>Nocardioides sp. JS614</i>          | 0.49 ± 0.02  | 0.27 ± 0.02  | 0.08 ± 0.02  | -0.01 ± 0.02 | -0.05 ± 0.02 | -0.06 ± 0.02 | -0.05 ± 0.02 | -0.06 ± 0.02 | -0.06 ± 0.02 | -0.13 ± 0.01 | -0.11 ± 0.02 | -0.10 ± 0.01 | -0.12 ± 0.01 |
| Bacteria | <i>Nostoc punctiforme</i>              | 0.16 ± 0.01  | 0.12 ± 0.01  | 0.01 ± 0.01  | -0.11 ± 0.01 | -0.14 ± 0.01 | -0.16 ± 0.01 | -0.13 ± 0.01 | -0.10 ± 0.01 | -0.09 ± 0.01 | -0.12 ± 0.01 | -0.07 ± 0.01 | -0.07 ± 0.01 | -0.07 ± 0.01 |
| Bacteria | <i>Novosphingobium aromaticivorans</i> | 0.56 ± 0.02  | 0.42 ± 0.02  | 0.12 ± 0.02  | 0.00 ± 0.02  | -0.03 ± 0.02 | -0.06 ± 0.02 | -0.05 ± 0.02 | -0.05 ± 0.02 | -0.01 ± 0.02 | -0.06 ± 0.02 | -0.09 ± 0.02 | -0.11 ± 0.02 | -0.08 ± 0.02 |
| Bacteria | <i>Oceanobacillus ihagensis</i>        | 0.08 ± 0.02  | 0.09 ± 0.02  | -0.01 ± 0.02 | -0.02 ± 0.02 | -0.03 ± 0.02 | -0.04 ± 0.02 | -0.03 ± 0.02 | -0.03 ± 0.02 | -0.05 ± 0.02 | -0.05 ± 0.02 | -0.04 ± 0.02 | -0.04 ± 0.02 | -0.05 ± 0.02 |
| Bacteria | <i>Ochrobactrum anthropi</i>           | 0.43 ± 0.01  | 0.31 ± 0.02  | 0.07 ± 0.02  | -0.07 ± 0.02 | -0.11 ± 0.02 | -0.13 ± 0.02 | -0.11 ± 0.02 | -0.16 ± 0.02 | -0.13 ± 0.02 | -0.13 ± 0.02 | -0.11 ± 0.02 | -0.16 ± 0.02 | -0.19 ± 0.02 |
| Bacteria | <i>Oenococcus oeni</i>                 | 0.24 ± 0.02  | 0.15 ± 0.02  | 0.02 ± 0.03  | -0.09 ± 0.03 | -0.13 ± 0.03 | -0.11 ± 0.03 | -0.09 ± 0.03 | -0.13 ± 0.03 | -0.12 ± 0.03 | -0.10 ± 0.03 | -0.09 ± 0.03 | -0.10 ± 0.03 | -0.11 ± 0.03 |
| Bacteria | <i>Oligotropha carboxidovorans</i>     | 0.52 ± 0.02  | 0.41 ± 0.02  | 0.18 ± 0.02  | -0.03 ± 0.02 | -0.08 ± 0.02 | -0.08 ± 0.02 | -0.10 ± 0.02 | -0.09 ± 0.02 | -0.11 ± 0.02 | -0.15 ± 0.02 | -0.10 ± 0.02 | -0.16 ± 0.02 | -0.15 ± 0.02 |
| Bacteria | <i>Onion yellows</i>                   | 0.04 ± 0.03  | -0.07 ± 0.04 | -0.09 ± 0.04 | -0.10 ± 0.04 | -0.06 ± 0.04 | -0.01 ± 0.04 | -0.03 ± 0.04 | -0.03 ± 0.04 | 0.01 ± 0.03  | -0.07 ± 0.04 | -0.10 ± 0.04 | -0.03 ± 0.04 | 0.00 ± 0.03  |
| Bacteria | <i>Opiritatus terrae</i>               | 0.78 ± 0.01  | 0.66 ± 0.02  | 0.31 ± 0.02  | 0.04 ± 0.02  | -0.03 ± 0.02 | -0.03 ± 0.02 | -0.03 ± 0.02 | -0.05 ± 0.02 | -0.05 ± 0.02 | -0.08 ± 0.02 | -0.10 ± 0.02 | -0.11 ± 0.02 | -0.08 ± 0.02 |
| Bacteria | <i>Orientia tsutsugamushi</i>          | -0.15 ± 0.03 | -0.19 ± 0.04 | -0.14 ± 0.03 | -0.11 ± 0.03 | -0.14 ± 0.03 | -0.10 ± 0.03 | -0.06 ± 0.03 | -0.11 ± 0.03 | -0.08 ± 0.03 | -0.14 ± 0.03 | -0.12 ± 0.03 | -0.09 ± 0.03 | -0.14 ± 0.03 |
| Bacteria | <i>Parabacteroides distasonis</i>      | 0.52 ± 0.01  | 0.26 ± 0.02  | -0.11 ± 0.02 | -0.27 ± 0.02 | -0.16 ± 0.02 | -0.12 ± 0.02 | -0.11 ± 0.02 | -0.11 ± 0.02 | -0.13 ± 0.02 | -0.08 ± 0.02 | -0.11 ± 0.02 | -0.13 ± 0.02 | -0.10 ± 0.02 |
| Bacteria | <i>Paracoccus denitrificans</i>        | 0.64 ± 0.02  | 0.46 ± 0.02  | 0.22 ± 0.02  | 0.03 ± 0.02  | 0.01 ± 0.02  | -0.03 ± 0.02 | -0.08 ± 0.02 | -0.06 ± 0.02 | -0.09 ± 0.02 | -0.10 ± 0.02 | -0.09 ± 0.02 | -0.09 ± 0.02 | -0.11 ± 0.02 |
| Bacteria | <i>Parvibaculum lavamentivorans</i>    | 0.54 ± 0.02  | 0.40 ± 0.02  | 0.12 ± 0.02  | -0.08 ± 0.02 | -0.14 ± 0.02 | -0.11 ± 0.02 | -0.08 ± 0.02 | -0.10 ± 0.02 | -0.14 ± 0.02 | -0.12 ± 0.02 | -0.12 ± 0.02 | -0.11 ± 0.02 | -0.10 ± 0.02 |
| Bacteria | <i>Pasteurella multocida</i>           | 0.24 ± 0.02  | 0.10 ± 0.02  | -0.10 ± 0.02 | -0.17 ± 0.03 | -0.19 ± 0.03 | -0.11 ± 0.02 | -0.10 ± 0.02 | -0.08 ± 0.02 | -0.08 ± 0.02 | -0.08 ± 0.02 | -0.02 ± 0.02 | -0.08 ± 0.02 | -0.05 ± 0.02 |
| Bacteria | <i>Pectobacterium atrosepticum</i>     | 0.39 ± 0.01  | 0.28 ± 0.02  | 0.05 ± 0.02  | -0.01 ± 0.02 | -0.05 ± 0.02 | -0.03 ± 0.02 | -0.05 ± 0.02 | -0.06 ± 0.02 | -0.07 ± 0.02 | -0.09 ± 0.02 | -0.09 ± 0.02 | -0.08 ± 0.02 | -0.09 ± 0.02 |
| Bacteria | <i>Pediococcus pentosaceus</i>         | 0.19 ± 0.02  | 0.11 ± 0.02  | -0.10 ± 0.03 | -0.09 ± 0.03 | -0.11 ± 0.03 | -0.15 ± 0.03 | -0.15 ± 0.03 | -0.11 ± 0.03 | -0.08 ± 0.03 | -0.11 ± 0.02 | -0.11 ± 0.03 | -0.12 ± 0.03 | -0.12 ± 0.03 |
| Bacteria | <i>Pelobacter carbinolicus</i>         | 0.38 ± 0.02  | 0.27 ± 0.02  | 0.10 ± 0.02  | -0.02 ± 0.02 | -0.09 ± 0.02 | -0.13 ± 0.02 | -0.10 ± 0.02 | -0.10 ± 0.02 | -0.11 ± 0.02 | -0.11 ± 0.02 | -0.09 ± 0.02 | -0.12 ± 0.02 | -0.12 ± 0.02 |
| Bacteria | <i>Pelodictyon luteolum</i>            | 0.48 ± 0.02  | 0.32 ± 0.02  | 0.03 ± 0.02  | -0.11 ± 0.02 | -0.06 ± 0.02 | -0.03 ± 0.02 | -0.08 ± 0.02 | -0.05 ± 0.02 | -0.03 ± 0.02 | -0.09 ± 0.02 | -0.08 ± 0.02 | -0.11 ± 0.02 | -0.10 ± 0.02 |
| Bacteria | <i>Pelotomaculum thermopropionicum</i> | 0.26 ± 0.02  | 0.20 ± 0.02  | 0.04 ± 0.02  | 0.00 ± 0.02  | -0.02 ± 0.02 | -0.12 ± 0.02 | -0.08 ± 0.02 | -0.06 ± 0.02 | -0.09 ± 0.02 | -0.09 ± 0.02 | -0.06 ± 0.02 | -0.08 ± 0.02 | -0.07 ± 0.02 |
| Bacteria | <i>Persephonella marina</i>            | 0.09 ± 0.02  | 0.01 ± 0.02  | -0.07 ± 0.02 | -0.11 ± 0.02 | -0.11 ± 0.02 | -0.13 ± 0.02 | -0.09 ± 0.02 | -0.13 ± 0.02 | -0.13 ± 0.02 | -0.10 ± 0.02 | -0.09 ± 0.02 | -0.09 ± 0.02 | -0.09 ± 0.02 |
| Bacteria | <i>Petrogona mobilis</i>               | 0.01 ± 0.02  | 0.05 ± 0.02  | -0.02 ± 0.02 | -0.02 ± 0.03 | -0.01 ± 0.02 | -0.02 ± 0.02 | -0.03 ± 0.02 | -0.09 ± 0.03 | -0.09 ± 0.02 | -0.09 ± 0.02 | -0.06 ± 0.02 | 0.02 ± 0.02  | -0.03 ± 0.02 |
| Bacteria | <i>Phenylobacterium zucineum</i>       | 0.66 ± 0.02  | 0.52 ± 0.02  | 0.21 ± 0.02  | 0.00 ± 0.02  | -0.01 ± 0.02 | 0.00 ± 0.02  | -0.03 ± 0.02 | -0.07 ± 0.02 | -0.05 ± 0.02 | -0.08 ± 0.02 | -0.10 ± 0.02 | -0.07 ± 0.02 | -0.06 ± 0.02 |

Continued on next page

| Type     | Species                              | Window 1    | Window 2     | Window 3     | Window 4     | Window 5     | Window 6     | Window 7     | Window 8     | Window 9     | Window 10    | Window 11    | Window 12    | Window 13    |
|----------|--------------------------------------|-------------|--------------|--------------|--------------|--------------|--------------|--------------|--------------|--------------|--------------|--------------|--------------|--------------|
| Bacteria | <i>Photobacterium profundum</i>      | 0.11 ± 0.01 | 0.04 ± 0.01  | -0.10 ± 0.02 | -0.11 ± 0.01 | -0.14 ± 0.01 | -0.11 ± 0.02 | -0.06 ± 0.01 | -0.09 ± 0.01 | -0.11 ± 0.01 | -0.12 ± 0.01 | -0.12 ± 0.01 | -0.10 ± 0.01 | -0.15 ± 0.01 |
| Bacteria | <i>Photorhabdus luminescens</i>      | 0.18 ± 0.01 | 0.08 ± 0.02  | -0.07 ± 0.02 | -0.10 ± 0.02 | -0.10 ± 0.02 | -0.12 ± 0.02 | -0.10 ± 0.02 | -0.11 ± 0.02 | -0.10 ± 0.02 | -0.10 ± 0.02 | -0.08 ± 0.02 | -0.08 ± 0.02 | -0.08 ± 0.02 |
| Bacteria | <i>Polaromonas naphthalenivorans</i> | 0.78 ± 0.02 | 0.61 ± 0.02  | 0.25 ± 0.02  | 0.10 ± 0.02  | 0.02 ± 0.02  | -0.03 ± 0.02 | -0.04 ± 0.02 | -0.07 ± 0.02 | -0.13 ± 0.02 | -0.14 ± 0.02 | -0.13 ± 0.02 | -0.13 ± 0.02 | -0.15 ± 0.02 |
| Bacteria | <i>Polynucleobacter necessarius</i>  | 0.27 ± 0.02 | 0.16 ± 0.02  | -0.11 ± 0.03 | -0.37 ± 0.03 | -0.38 ± 0.03 | -0.28 ± 0.02 | -0.22 ± 0.02 | -0.20 ± 0.02 | -0.22 ± 0.02 | -0.14 ± 0.02 | -0.15 ± 0.02 | -0.17 ± 0.02 | -0.16 ± 0.02 |
| Bacteria | <i>Porphyromonas gingivalis</i>      | 0.35 ± 0.02 | 0.15 ± 0.02  | -0.17 ± 0.03 | -0.20 ± 0.03 | -0.18 ± 0.02 | -0.18 ± 0.02 | -0.12 ± 0.02 | -0.09 ± 0.02 | -0.17 ± 0.02 | -0.09 ± 0.02 | -0.14 ± 0.02 | -0.17 ± 0.03 | -0.23 ± 0.03 |
| Bacteria | <i>Prochlorococcus marinus</i>       | 0.03 ± 0.02 | 0.04 ± 0.02  | -0.10 ± 0.02 | -0.16 ± 0.03 | -0.10 ± 0.03 | -0.10 ± 0.02 | -0.08 ± 0.02 | -0.03 ± 0.02 | -0.03 ± 0.02 | -0.05 ± 0.02 | -0.04 ± 0.02 | -0.06 ± 0.02 | -0.04 ± 0.02 |
| Bacteria | <i>Propionibacterium acnes</i>       | 0.17 ± 0.02 | 0.06 ± 0.02  | -0.08 ± 0.02 | -0.09 ± 0.02 | -0.09 ± 0.02 | -0.06 ± 0.02 | -0.08 ± 0.02 | -0.06 ± 0.02 | -0.08 ± 0.02 | -0.08 ± 0.02 | -0.08 ± 0.02 | -0.08 ± 0.02 | -0.10 ± 0.02 |
| Bacteria | <i>Prosthecochloris aestuarii</i>    | 0.34 ± 0.02 | 0.20 ± 0.02  | -0.01 ± 0.02 | -0.11 ± 0.02 | -0.18 ± 0.02 | -0.06 ± 0.02 | -0.10 ± 0.02 | -0.09 ± 0.02 | -0.13 ± 0.02 | -0.10 ± 0.02 | -0.11 ± 0.02 | -0.11 ± 0.02 | -0.08 ± 0.02 |
| Bacteria | <i>Proteus mirabilis</i>             | 0.10 ± 0.02 | -0.06 ± 0.02 | -0.21 ± 0.02 | -0.22 ± 0.02 | -0.19 ± 0.02 | -0.20 ± 0.02 | -0.15 ± 0.02 | -0.14 ± 0.02 | -0.15 ± 0.02 | -0.16 ± 0.02 | -0.12 ± 0.02 | -0.09 ± 0.02 | -0.10 ± 0.02 |
| Bacteria | <i>Pseudoalteromonas atlantica</i>   | 0.24 ± 0.01 | 0.16 ± 0.02  | -0.05 ± 0.02 | -0.11 ± 0.02 | -0.12 ± 0.02 | -0.12 ± 0.02 | -0.07 ± 0.02 | -0.09 ± 0.02 | -0.11 ± 0.02 | -0.12 ± 0.02 | -0.14 ± 0.02 | -0.12 ± 0.02 | -0.11 ± 0.02 |
| Bacteria | <i>Pseudomonas aeruginosa</i>        | 0.70 ± 0.01 | 0.53 ± 0.01  | 0.22 ± 0.01  | 0.10 ± 0.01  | 0.05 ± 0.01  | 0.01 ± 0.01  | -0.02 ± 0.01 | -0.07 ± 0.01 | -0.10 ± 0.01 | -0.10 ± 0.01 | -0.12 ± 0.01 | -0.09 ± 0.01 | -0.12 ± 0.01 |
| Bacteria | <i>Psychrobacter arcticus</i>        | 0.36 ± 0.02 | 0.22 ± 0.02  | 0.05 ± 0.02  | -0.04 ± 0.02 | -0.12 ± 0.02 | -0.15 ± 0.02 | -0.13 ± 0.02 | -0.17 ± 0.02 | -0.15 ± 0.02 | -0.12 ± 0.02 | -0.17 ± 0.02 | -0.16 ± 0.02 | -0.16 ± 0.02 |
| Bacteria | <i>Psychromonas ingrahamii</i>       | 0.29 ± 0.01 | 0.18 ± 0.02  | -0.01 ± 0.02 | -0.10 ± 0.02 | -0.10 ± 0.02 | -0.07 ± 0.02 | -0.06 ± 0.02 | -0.10 ± 0.02 | -0.07 ± 0.02 | -0.06 ± 0.02 | -0.10 ± 0.02 | -0.06 ± 0.02 | -0.07 ± 0.02 |
| Bacteria | <i>Ralstonia solanacearum</i>        | 0.76 ± 0.02 | 0.58 ± 0.02  | 0.30 ± 0.02  | 0.07 ± 0.02  | 0.03 ± 0.02  | -0.04 ± 0.02 | -0.04 ± 0.02 | -0.03 ± 0.02 | -0.05 ± 0.02 | -0.09 ± 0.02 | -0.07 ± 0.02 | -0.09 ± 0.02 | -0.08 ± 0.02 |
| Bacteria | <i>Renibacterium salmoninarum</i>    | 0.12 ± 0.02 | 0.09 ± 0.02  | -0.03 ± 0.02 | -0.16 ± 0.02 | -0.12 ± 0.02 | -0.11 ± 0.02 | -0.13 ± 0.02 | -0.12 ± 0.02 | -0.14 ± 0.02 | -0.13 ± 0.02 | -0.16 ± 0.02 | -0.17 ± 0.02 | -0.13 ± 0.02 |
| Bacteria | <i>Rhizobium etli</i>                | 0.50 ± 0.02 | 0.36 ± 0.02  | 0.15 ± 0.02  | 0.04 ± 0.02  | -0.01 ± 0.02 | -0.05 ± 0.02 | -0.04 ± 0.02 | -0.05 ± 0.02 | -0.10 ± 0.02 | -0.10 ± 0.02 | -0.09 ± 0.02 | -0.09 ± 0.02 | -0.10 ± 0.02 |
| Bacteria | <i>Rhodobacter sphaeroides</i>       | 0.69 ± 0.02 | 0.47 ± 0.02  | 0.18 ± 0.02  | 0.08 ± 0.02  | 0.02 ± 0.02  | 0.00 ± 0.02  | -0.05 ± 0.02 | -0.08 ± 0.02 | -0.10 ± 0.02 | -0.09 ± 0.02 | -0.10 ± 0.02 | -0.07 ± 0.02 | -0.10 ± 0.02 |
| Bacteria | <i>Rhodococcus erythropolis</i>      | 0.35 ± 0.01 | 0.28 ± 0.01  | 0.06 ± 0.01  | -0.04 ± 0.01 | -0.06 ± 0.01 | -0.04 ± 0.01 | -0.07 ± 0.01 | -0.08 ± 0.01 | -0.08 ± 0.01 | -0.09 ± 0.01 | -0.12 ± 0.01 | -0.11 ± 0.01 | -0.13 ± 0.01 |
| Bacteria | <i>Rhodoferrax ferrireducens</i>     | 0.65 ± 0.01 | 0.50 ± 0.02  | 0.13 ± 0.02  | -0.02 ± 0.02 | -0.05 ± 0.02 | -0.06 ± 0.02 | -0.11 ± 0.02 | -0.10 ± 0.02 | -0.11 ± 0.02 | -0.13 ± 0.02 | -0.16 ± 0.02 | -0.16 ± 0.02 | -0.10 ± 0.02 |
| Bacteria | <i>Rhodopirellula baltica</i>        | 0.14 ± 0.01 | 0.16 ± 0.01  | 0.06 ± 0.01  | -0.02 ± 0.01 | -0.05 ± 0.01 | -0.06 ± 0.01 | -0.07 ± 0.01 | -0.10 ± 0.01 | -0.08 ± 0.01 | -0.06 ± 0.01 | -0.11 ± 0.01 | -0.12 ± 0.01 | -0.16 ± 0.01 |
| Bacteria | <i>Rhodospseudomonas palustris</i>   | 0.61 ± 0.02 | 0.54 ± 0.02  | 0.24 ± 0.02  | 0.02 ± 0.02  | -0.04 ± 0.02 | -0.10 ± 0.02 | -0.12 ± 0.02 | -0.13 ± 0.02 | -0.13 ± 0.01 | -0.12 ± 0.02 | -0.13 ± 0.01 | -0.16 ± 0.02 | -0.16 ± 0.02 |
| Bacteria | <i>Rhodospirillum centenum</i>       | 0.64 ± 0.02 | 0.53 ± 0.02  | 0.26 ± 0.02  | 0.09 ± 0.02  | -0.02 ± 0.02 | -0.03 ± 0.02 | -0.04 ± 0.02 | -0.08 ± 0.02 | -0.07 ± 0.02 | -0.07 ± 0.02 | -0.08 ± 0.02 | -0.07 ± 0.02 | -0.08 ± 0.02 |
| Bacteria | <i>Rickettsia akari</i>              | 0.10 ± 0.03 | 0.06 ± 0.03  | -0.10 ± 0.03 | -0.10 ± 0.03 | -0.09 ± 0.03 | -0.18 ± 0.03 | -0.09 ± 0.03 | -0.09 ± 0.03 | -0.04 ± 0.03 | -0.03 ± 0.03 | -0.09 ± 0.03 | -0.07 ± 0.03 | -0.11 ± 0.03 |
| Bacteria | <i>Roseiflexus castenholzii</i>      | 0.43 ± 0.01 | 0.35 ± 0.02  | 0.12 ± 0.02  | -0.02 ± 0.02 | -0.04 ± 0.02 | -0.05 ± 0.02 | -0.04 ± 0.02 | -0.06 ± 0.02 | -0.07 ± 0.02 | -0.05 ± 0.02 | -0.03 ± 0.02 | -0.05 ± 0.02 | -0.04 ± 0.02 |
| Bacteria | <i>Roseobacter denitrificans</i>     | 0.53 ± 0.02 | 0.37 ± 0.02  | 0.11 ± 0.02  | -0.05 ± 0.02 | -0.02 ± 0.02 | -0.05 ± 0.02 | -0.08 ± 0.02 | -0.07 ± 0.02 | -0.06 ± 0.02 | -0.09 ± 0.02 | -0.06 ± 0.02 | -0.04 ± 0.02 | -0.04 ± 0.02 |
| Bacteria | <i>Rubrobacter xylophilus</i>        | 0.50 ± 0.02 | 0.39 ± 0.02  | 0.18 ± 0.02  | -0.01 ± 0.02 | -0.09 ± 0.02 | -0.06 ± 0.02 | -0.08 ± 0.02 | -0.05 ± 0.02 | -0.05 ± 0.02 | -0.08 ± 0.02 | -0.06 ± 0.02 | -0.05 ± 0.02 | -0.06 ± 0.02 |
| Bacteria | <i>Ruegeria pomeroyi</i>             | 0.65 ± 0.02 | 0.51 ± 0.02  | 0.19 ± 0.02  | 0.04 ± 0.02  | -0.01 ± 0.02 | -0.02 ± 0.02 | -0.02 ± 0.02 | -0.07 ± 0.02 | -0.07 ± 0.02 | -0.09 ± 0.02 | -0.11 ± 0.02 | -0.10 ± 0.02 | -0.12 ± 0.02 |
| Bacteria | <i>Saccharophagus degradans</i>      | 0.24 ± 0.02 | 0.14 ± 0.02  | -0.06 ± 0.02 | -0.17 ± 0.02 | -0.22 ± 0.02 | -0.18 ± 0.02 | -0.17 ± 0.02 | -0.17 ± 0.02 | -0.16 ± 0.02 | -0.18 ± 0.02 | -0.16 ± 0.02 | -0.17 ± 0.02 | -0.18 ± 0.02 |
| Bacteria | <i>Saccharopolyspora erythraea</i>   | 0.40 ± 0.01 | 0.25 ± 0.01  | 0.07 ± 0.01  | 0.00 ± 0.01  | -0.05 ± 0.01 | -0.04 ± 0.01 | -0.07 ± 0.01 | -0.08 ± 0.01 | -0.10 ± 0.01 | -0.08 ± 0.01 | -0.09 ± 0.01 | -0.10 ± 0.01 | -0.12 ± 0.01 |
| Bacteria | <i>Salinibacter ruber</i>            | 0.59 ± 0.02 | 0.57 ± 0.02  | 0.38 ± 0.02  | 0.23 ± 0.02  | 0.17 ± 0.02  | 0.17 ± 0.02  | 0.15 ± 0.02  | 0.11 ± 0.02  | 0.10 ± 0.02  | 0.06 ± 0.02  | 0.06 ± 0.02  | 0.06 ± 0.02  | 0.04 ± 0.02  |
| Bacteria | <i>Salinispora arenicola</i>         | 0.35 ± 0.01 | 0.24 ± 0.02  | 0.05 ± 0.02  | -0.01 ± 0.02 | -0.02 ± 0.02 | -0.02 ± 0.01 | -0.01 ± 0.01 | -0.02 ± 0.01 | -0.08 ± 0.01 | -0.05 ± 0.01 | -0.06 ± 0.01 | -0.06 ± 0.01 | -0.10 ± 0.01 |
| Bacteria | <i>Salmonella enterica</i>           | 0.30 ± 0.02 | 0.21 ± 0.02  | 0.01 ± 0.02  | -0.05 ± 0.02 | -0.03 ± 0.02 | -0.06 ± 0.02 | -0.02 ± 0.02 | -0.04 ± 0.02 | -0.06 ± 0.02 | -0.05 ± 0.02 | -0.05 ± 0.02 | -0.10 ± 0.02 | -0.09 ± 0.02 |
| Bacteria | <i>Serratia proteamaculans</i>       | 0.51 ± 0.01 | 0.37 ± 0.02  | 0.10 ± 0.02  | 0.02 ± 0.02  | -0.04 ± 0.02 | -0.04 ± 0.02 | -0.06 ± 0.02 | -0.04 ± 0.02 | -0.08 ± 0.02 | -0.10 ± 0.02 | -0.09 ± 0.02 | -0.13 ± 0.02 | -0.12 ± 0.02 |
| Bacteria | <i>Shewanella amazonensis</i>        | 0.40 ± 0.02 | 0.19 ± 0.02  | -0.04 ± 0.02 | -0.09 ± 0.02 | -0.13 ± 0.02 | -0.11 ± 0.02 | -0.10 ± 0.02 | -0.12 ± 0.02 | -0.13 ± 0.02 | -0.14 ± 0.02 | -0.14 ± 0.02 | -0.14 ± 0.02 | -0.14 ± 0.02 |
| Bacteria | <i>Shigella boydii</i>               | 0.27 ± 0.02 | 0.25 ± 0.02  | -0.02 ± 0.02 | -0.12 ± 0.02 | -0.07 ± 0.02 | 0.00 ± 0.02  | -0.09 ± 0.02 | -0.10 ± 0.02 | -0.06 ± 0.02 | -0.10 ± 0.02 | -0.02 ± 0.02 | -0.08 ± 0.02 | -0.07 ± 0.02 |
| Bacteria | <i>Sinorhizobium medicae</i>         | 0.52 ± 0.02 | 0.36 ± 0.02  | 0.07 ± 0.02  | -0.04 ± 0.02 | -0.07 ± 0.02 | -0.07 ± 0.02 | -0.08 ± 0.02 | -0.10 ± 0.02 | -0.10 ± 0.02 | -0.08 ± 0.02 | -0.06 ± 0.02 | -0.09 ± 0.02 | -0.09 ± 0.02 |
| Bacteria | <i>Sodalis glossinidius</i>          | 0.44 ± 0.02 | 0.29 ± 0.02  | 0.02 ± 0.02  | -0.03 ± 0.02 | -0.08 ± 0.02 | -0.03 ± 0.02 | -0.05 ± 0.02 | -0.03 ± 0.02 | -0.01 ± 0.02 | -0.04 ± 0.02 | -0.08 ± 0.02 | -0.09 ± 0.02 | -0.05 ± 0.02 |
| Bacteria | <i>Solibacter usitatus</i>           | 0.43 ± 0.01 | 0.36 ± 0.01  | 0.15 ± 0.01  | 0.00 ± 0.01  | -0.01 ± 0.01 | -0.01 ± 0.01 | -0.02 ± 0.01 | -0.05 ± 0.01 | -0.04 ± 0.01 | -0.05 ± 0.01 | -0.06 ± 0.01 | -0.06 ± 0.01 | -0.05 ± 0.01 |
| Bacteria | <i>Sorangium cellulosum</i>          | 0.62 ± 0.01 | 0.59 ± 0.01  | 0.36 ± 0.01  | 0.19 ± 0.01  | 0.12 ± 0.01  | 0.05 ± 0.01  | 0.01 ± 0.01  | 0.00 ± 0.01  | -0.01 ± 0.01 | -0.04 ± 0.01 | -0.03 ± 0.01 | -0.04 ± 0.01 | -0.05 ± 0.01 |

Continued on next page

| Type     | Species                                    | Window 1     | Window 2     | Window 3     | Window 4     | Window 5     | Window 6     | Window 7     | Window 8     | Window 9     | Window 10    | Window 11    | Window 12    | Window 13    |
|----------|--------------------------------------------|--------------|--------------|--------------|--------------|--------------|--------------|--------------|--------------|--------------|--------------|--------------|--------------|--------------|
| Bacteria | <i>Sphingomonas wittichii</i>              | 0.68 ± 0.02  | 0.50 ± 0.02  | 0.20 ± 0.02  | 0.04 ± 0.02  | 0.02 ± 0.02  | -0.03 ± 0.02 | -0.04 ± 0.02 | -0.05 ± 0.02 | -0.06 ± 0.02 | -0.09 ± 0.01 | -0.08 ± 0.02 | -0.09 ± 0.02 | -0.09 ± 0.02 |
| Bacteria | <i>Sphingopyxis alaskensis</i>             | 0.59 ± 0.02  | 0.43 ± 0.02  | 0.16 ± 0.02  | 0.05 ± 0.02  | -0.02 ± 0.02 | -0.01 ± 0.02 | -0.04 ± 0.02 | -0.01 ± 0.02 | -0.06 ± 0.02 | -0.09 ± 0.02 | -0.08 ± 0.02 | -0.10 ± 0.02 | -0.09 ± 0.02 |
| Bacteria | <i>Staphylococcus aureus</i>               | 0.04 ± 0.02  | 0.01 ± 0.02  | -0.09 ± 0.02 | -0.07 ± 0.02 | -0.08 ± 0.02 | -0.10 ± 0.02 | -0.07 ± 0.02 | -0.07 ± 0.02 | -0.09 ± 0.02 | -0.06 ± 0.02 | -0.05 ± 0.02 | -0.08 ± 0.02 | -0.09 ± 0.02 |
| Bacteria | <i>Stenotrophomonas maltophilia</i>        | 0.72 ± 0.02  | 0.55 ± 0.02  | 0.21 ± 0.02  | 0.05 ± 0.02  | 0.00 ± 0.02  | -0.06 ± 0.02 | -0.06 ± 0.02 | -0.06 ± 0.02 | -0.07 ± 0.02 | -0.10 ± 0.02 | -0.10 ± 0.02 | -0.12 ± 0.02 | -0.10 ± 0.02 |
| Bacteria | <i>Streptococcus agalactiae</i>            | 0.20 ± 0.02  | -0.01 ± 0.02 | -0.14 ± 0.02 | -0.15 ± 0.02 | -0.14 ± 0.02 | -0.12 ± 0.02 | -0.14 ± 0.02 | -0.06 ± 0.02 | -0.09 ± 0.02 | -0.13 ± 0.02 | -0.19 ± 0.02 | -0.09 ± 0.02 | -0.07 ± 0.02 |
| Bacteria | <i>Streptomyces avermitilis</i>            | 0.51 ± 0.01  | 0.43 ± 0.01  | 0.25 ± 0.01  | 0.14 ± 0.01  | 0.11 ± 0.01  | 0.06 ± 0.01  | 0.02 ± 0.01  | 0.05 ± 0.01  | 0.00 ± 0.01  | -0.01 ± 0.01 | -0.03 ± 0.01 | -0.04 ± 0.01 | -0.04 ± 0.01 |
| Bacteria | <i>Sulfurihydrogenibium azorense</i>       | -0.01 ± 0.03 | -0.03 ± 0.03 | -0.02 ± 0.03 | -0.02 ± 0.03 | -0.08 ± 0.03 | -0.10 ± 0.03 | -0.11 ± 0.03 | -0.05 ± 0.03 | -0.07 ± 0.03 | -0.05 ± 0.03 | -0.02 ± 0.02 | -0.05 ± 0.03 | -0.05 ± 0.03 |
| Bacteria | <i>Sulfurimonas denitrificans</i>          | 0.19 ± 0.02  | 0.07 ± 0.02  | -0.08 ± 0.02 | -0.13 ± 0.03 | -0.18 ± 0.03 | -0.17 ± 0.02 | -0.14 ± 0.02 | -0.08 ± 0.02 | -0.10 ± 0.02 | -0.18 ± 0.02 | -0.15 ± 0.02 | -0.13 ± 0.02 | -0.11 ± 0.02 |
| Bacteria | <i>Sulfurovum sp. NBC37-1</i>              | 0.40 ± 0.02  | 0.25 ± 0.02  | -0.02 ± 0.02 | -0.07 ± 0.02 | -0.09 ± 0.02 | -0.10 ± 0.02 | -0.10 ± 0.02 | -0.06 ± 0.02 | -0.10 ± 0.02 | -0.11 ± 0.02 | -0.14 ± 0.02 | -0.12 ± 0.02 | -0.13 ± 0.02 |
| Bacteria | <i>Symbiobacterium thermophilum</i>        | 0.43 ± 0.02  | 0.33 ± 0.02  | 0.17 ± 0.02  | 0.10 ± 0.02  | 0.05 ± 0.02  | 0.05 ± 0.02  | 0.02 ± 0.02  | -0.02 ± 0.02 | -0.03 ± 0.02 | 0.00 ± 0.02  | 0.00 ± 0.02  | -0.03 ± 0.02 | -0.04 ± 0.02 |
| Bacteria | <i>Synechococcus elongatus</i>             | 0.31 ± 0.02  | 0.25 ± 0.02  | 0.00 ± 0.02  | -0.08 ± 0.02 | -0.12 ± 0.02 | -0.08 ± 0.02 | -0.08 ± 0.02 | -0.10 ± 0.02 | -0.10 ± 0.02 | -0.12 ± 0.02 | -0.10 ± 0.02 | -0.13 ± 0.02 | -0.11 ± 0.02 |
| Bacteria | <i>Synechocystis sp. PCC 6803</i>          | 0.36 ± 0.02  | 0.29 ± 0.02  | 0.12 ± 0.02  | -0.02 ± 0.02 | -0.09 ± 0.02 | -0.12 ± 0.02 | -0.12 ± 0.02 | -0.14 ± 0.02 | -0.10 ± 0.02 | -0.07 ± 0.02 | -0.05 ± 0.02 | -0.08 ± 0.02 | -0.07 ± 0.02 |
| Bacteria | <i>Syntrophobacter fumaroxidans</i>        | 0.39 ± 0.02  | 0.36 ± 0.02  | 0.17 ± 0.02  | 0.02 ± 0.02  | -0.03 ± 0.02 | -0.02 ± 0.02 | -0.03 ± 0.02 | -0.03 ± 0.02 | -0.05 ± 0.02 | -0.06 ± 0.02 | -0.07 ± 0.02 | -0.05 ± 0.02 | -0.07 ± 0.02 |
| Bacteria | <i>Syntrophomonas wolfei</i>               | 0.18 ± 0.02  | 0.12 ± 0.02  | 0.00 ± 0.02  | -0.02 ± 0.02 | -0.09 ± 0.02 | -0.12 ± 0.02 | -0.12 ± 0.02 | -0.08 ± 0.02 | -0.13 ± 0.02 | -0.13 ± 0.02 | -0.12 ± 0.02 | -0.12 ± 0.02 | -0.09 ± 0.02 |
| Bacteria | <i>Syntrophus aciditrophicus</i>           | 0.29 ± 0.02  | 0.26 ± 0.02  | 0.16 ± 0.02  | 0.07 ± 0.02  | -0.01 ± 0.02 | -0.02 ± 0.02 | -0.03 ± 0.02 | -0.01 ± 0.02 | -0.07 ± 0.02 | -0.02 ± 0.02 | -0.07 ± 0.02 | -0.02 ± 0.02 | -0.05 ± 0.02 |
| Bacteria | <i>Thauera sp. MZ1T</i>                    | 0.76 ± 0.02  | 0.57 ± 0.02  | 0.20 ± 0.02  | 0.06 ± 0.02  | 0.03 ± 0.02  | -0.02 ± 0.02 | -0.04 ± 0.02 | -0.06 ± 0.02 | -0.04 ± 0.02 | -0.10 ± 0.02 | -0.11 ± 0.02 | -0.13 ± 0.02 | -0.11 ± 0.02 |
| Bacteria | <i>Thermoanaerobacter pseudethanolicus</i> | -0.01 ± 0.02 | -0.02 ± 0.02 | -0.04 ± 0.02 | -0.05 ± 0.02 | -0.10 ± 0.02 | -0.09 ± 0.02 | -0.05 ± 0.02 | -0.06 ± 0.02 | -0.07 ± 0.02 | -0.06 ± 0.02 | 0.00 ± 0.02  | -0.01 ± 0.02 | 0.01 ± 0.02  |
| Bacteria | <i>Thermobifida fusca</i>                  | 0.36 ± 0.02  | 0.28 ± 0.02  | 0.15 ± 0.02  | 0.10 ± 0.02  | 0.07 ± 0.02  | 0.07 ± 0.02  | 0.01 ± 0.02  | 0.01 ± 0.02  | 0.01 ± 0.02  | -0.04 ± 0.02 | -0.01 ± 0.02 | 0.00 ± 0.02  | -0.02 ± 0.02 |
| Bacteria | <i>Thermodesulfobivrio yellowstonii</i>    | 0.03 ± 0.02  | 0.02 ± 0.02  | -0.04 ± 0.02 | -0.09 ± 0.02 | -0.14 ± 0.02 | -0.14 ± 0.02 | -0.12 ± 0.02 | -0.06 ± 0.02 | -0.07 ± 0.02 | -0.06 ± 0.02 | -0.05 ± 0.02 | -0.09 ± 0.02 | -0.05 ± 0.02 |
| Bacteria | <i>Thermomicrobium roseum</i>              | 0.15 ± 0.02  | 0.16 ± 0.02  | 0.06 ± 0.02  | 0.02 ± 0.02  | -0.05 ± 0.02 | -0.08 ± 0.02 | -0.08 ± 0.02 | -0.08 ± 0.02 | -0.05 ± 0.02 | -0.08 ± 0.02 | -0.10 ± 0.02 | -0.05 ± 0.02 | -0.08 ± 0.02 |
| Bacteria | <i>Thermosipho africanus</i>               | -0.09 ± 0.02 | 0.02 ± 0.02  | -0.05 ± 0.03 | -0.07 ± 0.03 | -0.05 ± 0.02 | -0.03 ± 0.02 | -0.08 ± 0.02 | -0.08 ± 0.02 | -0.08 ± 0.02 | -0.05 ± 0.02 | -0.06 ± 0.02 | -0.10 ± 0.02 | -0.08 ± 0.02 |
| Bacteria | <i>Thermosynechococcus elongatus</i>       | 0.30 ± 0.02  | 0.27 ± 0.02  | 0.15 ± 0.02  | 0.00 ± 0.02  | -0.07 ± 0.02 | -0.07 ± 0.02 | 0.01 ± 0.02  | -0.09 ± 0.02 | -0.03 ± 0.02 | -0.09 ± 0.02 | -0.04 ± 0.02 | -0.11 ± 0.02 | -0.04 ± 0.02 |
| Bacteria | <i>Thermotoga lettingae</i>                | -0.05 ± 0.02 | -0.05 ± 0.02 | -0.02 ± 0.02 | -0.04 ± 0.02 | -0.02 ± 0.02 | -0.06 ± 0.02 | -0.05 ± 0.02 | -0.08 ± 0.02 | -0.08 ± 0.02 | -0.10 ± 0.02 | -0.03 ± 0.02 | -0.02 ± 0.02 | -0.06 ± 0.02 |
| Bacteria | <i>Thermus thermophilus</i>                | 0.31 ± 0.02  | 0.30 ± 0.02  | 0.10 ± 0.03  | -0.10 ± 0.02 | -0.16 ± 0.02 | -0.18 ± 0.02 | -0.11 ± 0.02 | -0.15 ± 0.02 | -0.19 ± 0.02 | -0.17 ± 0.02 | -0.17 ± 0.02 | -0.19 ± 0.02 | -0.15 ± 0.02 |
| Bacteria | <i>Thioalkalivibrio sp. HL-EbGR7</i>       | 0.65 ± 0.02  | 0.48 ± 0.02  | 0.17 ± 0.02  | -0.08 ± 0.02 | -0.13 ± 0.02 | -0.13 ± 0.02 | -0.12 ± 0.02 | -0.11 ± 0.02 | -0.12 ± 0.02 | -0.13 ± 0.02 | -0.13 ± 0.02 | -0.12 ± 0.02 | -0.14 ± 0.02 |
| Bacteria | <i>Thiobacillus denitrificans</i>          | 0.60 ± 0.02  | 0.46 ± 0.02  | 0.20 ± 0.02  | 0.00 ± 0.02  | -0.01 ± 0.02 | -0.03 ± 0.02 | -0.04 ± 0.02 | -0.09 ± 0.02 | -0.08 ± 0.02 | -0.10 ± 0.02 | -0.08 ± 0.02 | -0.11 ± 0.02 | -0.09 ± 0.02 |
| Bacteria | <i>Thiomicrospira crunogena</i>            | 0.30 ± 0.02  | 0.20 ± 0.02  | 0.02 ± 0.02  | -0.15 ± 0.02 | -0.16 ± 0.02 | -0.18 ± 0.02 | -0.10 ± 0.02 | -0.12 ± 0.02 | -0.14 ± 0.02 | -0.15 ± 0.02 | -0.13 ± 0.02 | -0.14 ± 0.02 | -0.12 ± 0.02 |
| Bacteria | <i>Tolomonas auensis</i>                   | 0.38 ± 0.02  | 0.21 ± 0.02  | -0.03 ± 0.02 | -0.08 ± 0.02 | -0.12 ± 0.02 | -0.12 ± 0.02 | -0.12 ± 0.02 | -0.09 ± 0.02 | -0.09 ± 0.02 | -0.11 ± 0.02 | -0.13 ± 0.02 | -0.12 ± 0.02 | -0.09 ± 0.02 |
| Bacteria | <i>Treponema denticola</i>                 | 0.18 ± 0.02  | 0.05 ± 0.02  | -0.12 ± 0.02 | -0.14 ± 0.02 | -0.13 ± 0.02 | -0.18 ± 0.02 | -0.15 ± 0.02 | -0.18 ± 0.02 | -0.15 ± 0.02 | -0.17 ± 0.02 | -0.16 ± 0.02 | -0.16 ± 0.02 | -0.12 ± 0.02 |
| Bacteria | <i>Trichodesmium erythraeum</i>            | 0.14 ± 0.01  | 0.10 ± 0.02  | -0.03 ± 0.02 | -0.10 ± 0.02 | -0.10 ± 0.02 | -0.11 ± 0.02 | -0.06 ± 0.02 | -0.04 ± 0.02 | -0.05 ± 0.02 | -0.05 ± 0.02 | -0.05 ± 0.02 | -0.02 ± 0.02 | -0.02 ± 0.02 |
| Bacteria | <i>Tropheryma whipplei</i>                 | -0.01 ± 0.04 | -0.02 ± 0.04 | -0.10 ± 0.04 | -0.12 ± 0.04 | -0.12 ± 0.04 | -0.15 ± 0.04 | -0.18 ± 0.04 | -0.11 ± 0.03 | -0.11 ± 0.04 | -0.10 ± 0.03 | -0.10 ± 0.04 | -0.15 ± 0.04 | -0.15 ± 0.04 |
| Bacteria | <i>Ureaplasma parvum</i>                   | -0.10 ± 0.08 | -0.08 ± 0.08 | -0.15 ± 0.10 | -0.21 ± 0.10 | -0.17 ± 0.10 | -0.06 ± 0.09 | -0.21 ± 0.11 | -0.05 ± 0.08 | -0.12 ± 0.08 | -0.04 ± 0.09 | -0.03 ± 0.09 | -0.09 ± 0.09 | 0.06 ± 0.07  |
| Bacteria | <i>Variovorax paradoxus</i>                | 0.86 ± 0.01  | 0.67 ± 0.01  | 0.25 ± 0.01  | 0.04 ± 0.01  | 0.02 ± 0.01  | -0.03 ± 0.01 | -0.08 ± 0.01 | -0.09 ± 0.01 | -0.13 ± 0.01 | -0.16 ± 0.01 | -0.14 ± 0.01 | -0.16 ± 0.01 | -0.17 ± 0.01 |
| Bacteria | <i>Verminephrobacter eiseniae</i>          | 0.63 ± 0.01  | 0.49 ± 0.02  | 0.15 ± 0.02  | 0.03 ± 0.02  | -0.01 ± 0.02 | -0.02 ± 0.01 | -0.03 ± 0.01 | -0.10 ± 0.02 | -0.13 ± 0.01 | -0.11 ± 0.01 | -0.13 ± 0.01 | -0.15 ± 0.01 | -0.15 ± 0.01 |
| Bacteria | <i>Vibrio cholerae</i>                     | 0.25 ± 0.02  | 0.17 ± 0.02  | -0.02 ± 0.02 | -0.12 ± 0.02 | -0.12 ± 0.02 | -0.12 ± 0.02 | -0.04 ± 0.02 | -0.06 ± 0.02 | -0.13 ± 0.02 | -0.09 ± 0.02 | -0.08 ± 0.02 | -0.10 ± 0.02 | -0.11 ± 0.02 |
| Bacteria | <i>Wigglesworthia glossinidia</i>          | -0.11 ± 0.05 | -0.06 ± 0.05 | -0.13 ± 0.04 | -0.14 ± 0.04 | -0.20 ± 0.05 | -0.12 ± 0.04 | -0.13 ± 0.04 | -0.12 ± 0.04 | -0.15 ± 0.04 | -0.12 ± 0.04 | -0.05 ± 0.04 | -0.07 ± 0.04 | -0.02 ± 0.04 |
| Bacteria | <i>Wolbachia endosymbiont</i>              | 0.09 ± 0.03  | 0.12 ± 0.03  | -0.03 ± 0.03 | -0.20 ± 0.03 | -0.24 ± 0.03 | -0.16 ± 0.03 | -0.08 ± 0.03 | -0.06 ± 0.03 | 0.05 ± 0.03  | 0.00 ± 0.03  | -0.11 ± 0.03 | -0.05 ± 0.03 | -0.04 ± 0.03 |
| Bacteria | <i>Wolinella succinogenes</i>              | 0.28 ± 0.02  | 0.14 ± 0.02  | -0.07 ± 0.03 | -0.09 ± 0.02 | -0.11 ± 0.02 | -0.09 ± 0.02 | -0.07 ± 0.02 | -0.13 ± 0.02 | -0.12 ± 0.02 | -0.11 ± 0.02 | -0.10 ± 0.02 | -0.10 ± 0.02 | -0.12 ± 0.02 |
| Bacteria | <i>Xanthobacter autotrophicus</i>          | 0.55 ± 0.02  | 0.44 ± 0.02  | 0.21 ± 0.02  | 0.08 ± 0.02  | 0.02 ± 0.02  | 0.01 ± 0.02  | -0.04 ± 0.02 | -0.04 ± 0.02 | -0.07 ± 0.02 | -0.09 ± 0.02 | -0.09 ± 0.02 | -0.10 ± 0.02 | -0.12 ± 0.02 |

Continued on next page

| Type     | Species                                    | Window 1     | Window 2     | Window 3     | Window 4     | Window 5     | Window 6     | Window 7     | Window 8     | Window 9     | Window 10    | Window 11    | Window 12    | Window 13    |
|----------|--------------------------------------------|--------------|--------------|--------------|--------------|--------------|--------------|--------------|--------------|--------------|--------------|--------------|--------------|--------------|
| Bacteria | <i>Xanthomonas axonopodis</i>              | 0.57 ± 0.02  | 0.50 ± 0.02  | 0.20 ± 0.02  | 0.03 ± 0.02  | 0.01 ± 0.02  | -0.01 ± 0.02 | -0.04 ± 0.02 | -0.09 ± 0.02 | -0.12 ± 0.02 | -0.12 ± 0.02 | -0.14 ± 0.02 | -0.12 ± 0.02 | -0.13 ± 0.02 |
| Bacteria | <i>Xylella fastidiosa</i>                  | 0.15 ± 0.02  | 0.15 ± 0.02  | 0.03 ± 0.02  | -0.06 ± 0.02 | -0.08 ± 0.02 | -0.06 ± 0.02 | -0.08 ± 0.02 | -0.07 ± 0.02 | -0.05 ± 0.02 | -0.07 ± 0.02 | -0.05 ± 0.02 | -0.06 ± 0.02 | -0.04 ± 0.02 |
| Bacteria | <i>Yersinia enterocolitica</i>             | 0.24 ± 0.01  | 0.12 ± 0.02  | -0.10 ± 0.02 | -0.14 ± 0.02 | -0.12 ± 0.02 | -0.14 ± 0.02 | -0.14 ± 0.02 | -0.11 ± 0.02 | -0.11 ± 0.02 | -0.10 ± 0.02 | -0.13 ± 0.02 | -0.10 ± 0.02 | -0.09 ± 0.02 |
| Bacteria | <i>Zymomonas mobilis</i>                   | 0.08 ± 0.02  | 0.04 ± 0.02  | -0.12 ± 0.03 | -0.17 ± 0.03 | -0.17 ± 0.03 | -0.21 ± 0.03 | -0.12 ± 0.02 | -0.16 ± 0.03 | -0.19 ± 0.03 | -0.21 ± 0.03 | -0.18 ± 0.03 | -0.18 ± 0.02 | -0.15 ± 0.02 |
| Archaea  | <i>Aeropyrum pernix</i>                    | 0.15 ± 0.02  | 0.08 ± 0.02  | 0.01 ± 0.03  | 0.00 ± 0.03  | -0.01 ± 0.03 | -0.03 ± 0.02 | -0.02 ± 0.02 | 0.01 ± 0.02  | -0.04 ± 0.02 | -0.03 ± 0.02 | 0.02 ± 0.02  | 0.02 ± 0.02  | 0.00 ± 0.02  |
| Archaea  | <i>Caldivirga maquilingensis</i>           | -0.05 ± 0.02 | 0.00 ± 0.02  | -0.03 ± 0.02 | -0.04 ± 0.02 | -0.02 ± 0.02 | -0.10 ± 0.02 | -0.07 ± 0.02 | -0.03 ± 0.02 | -0.06 ± 0.02 | -0.07 ± 0.02 | -0.05 ± 0.02 | -0.07 ± 0.02 | -0.09 ± 0.02 |
| Archaea  | <i>Desulfurococcus kamchatkensis</i>       | 0.03 ± 0.03  | 0.05 ± 0.03  | 0.00 ± 0.03  | -0.03 ± 0.03 | -0.04 ± 0.03 | -0.05 ± 0.03 | -0.04 ± 0.03 | -0.05 ± 0.03 | -0.06 ± 0.03 | 0.02 ± 0.03  | -0.02 ± 0.03 | 0.01 ± 0.03  | -0.01 ± 0.03 |
| Archaea  | <i>Haloarcula marismortui</i>              | 0.38 ± 0.02  | 0.22 ± 0.02  | 0.11 ± 0.02  | 0.04 ± 0.02  | 0.02 ± 0.02  | -0.02 ± 0.02 | -0.02 ± 0.02 | -0.05 ± 0.02 | -0.03 ± 0.02 | -0.04 ± 0.02 | -0.04 ± 0.02 | -0.06 ± 0.02 | -0.05 ± 0.02 |
| Archaea  | <i>Halobacterium salinarum</i>             | 0.46 ± 0.02  | 0.28 ± 0.02  | 0.11 ± 0.02  | 0.08 ± 0.02  | 0.02 ± 0.02  | 0.00 ± 0.02  | 0.00 ± 0.02  | -0.07 ± 0.02 | -0.03 ± 0.02 | -0.05 ± 0.02 | -0.03 ± 0.02 | -0.06 ± 0.02 | -0.08 ± 0.02 |
| Archaea  | <i>Haloquadratum walsbyi</i>               | -0.01 ± 0.02 | -0.08 ± 0.02 | -0.14 ± 0.02 | -0.10 ± 0.02 | -0.15 ± 0.02 | -0.12 ± 0.02 | -0.15 ± 0.02 | -0.13 ± 0.02 | -0.11 ± 0.02 | -0.08 ± 0.02 | -0.10 ± 0.02 | -0.09 ± 0.02 | -0.06 ± 0.02 |
| Archaea  | <i>Halorubrum lacusprofundi</i>            | 0.42 ± 0.02  | 0.22 ± 0.02  | 0.10 ± 0.02  | 0.03 ± 0.02  | -0.01 ± 0.02 | -0.09 ± 0.02 | -0.06 ± 0.02 | -0.09 ± 0.02 | -0.09 ± 0.02 | -0.07 ± 0.02 | -0.09 ± 0.02 | -0.10 ± 0.02 | -0.10 ± 0.02 |
| Archaea  | <i>Hyperthermus butylicus</i>              | -0.06 ± 0.03 | -0.03 ± 0.03 | -0.03 ± 0.03 | -0.07 ± 0.03 | -0.02 ± 0.03 | -0.05 ± 0.03 | -0.08 ± 0.03 | -0.09 ± 0.03 | -0.03 ± 0.02 | -0.04 ± 0.02 | -0.03 ± 0.03 | -0.03 ± 0.02 | -0.04 ± 0.03 |
| Archaea  | <i>Ignicoccus hospitalis</i>               | 0.05 ± 0.03  | 0.03 ± 0.03  | 0.03 ± 0.03  | -0.06 ± 0.03 | -0.05 ± 0.03 | -0.03 ± 0.03 | -0.02 ± 0.03 | -0.03 ± 0.03 | -0.03 ± 0.03 | -0.05 ± 0.03 | -0.06 ± 0.03 | -0.01 ± 0.03 | -0.02 ± 0.03 |
| Archaea  | <i>Metallosphaera sedula</i>               | 0.13 ± 0.02  | 0.16 ± 0.02  | 0.05 ± 0.02  | 0.01 ± 0.02  | -0.02 ± 0.02 | -0.04 ± 0.02 | -0.08 ± 0.02 | -0.05 ± 0.02 | -0.04 ± 0.02 | -0.04 ± 0.02 | -0.02 ± 0.02 | -0.03 ± 0.02 | -0.09 ± 0.02 |
| Archaea  | <i>Methanobrevibacter smithii</i>          | 0.15 ± 0.02  | 0.03 ± 0.02  | -0.12 ± 0.03 | -0.15 ± 0.03 | -0.12 ± 0.03 | -0.13 ± 0.03 | -0.09 ± 0.02 | -0.11 ± 0.02 | -0.12 ± 0.03 | -0.11 ± 0.03 | -0.13 ± 0.03 | -0.09 ± 0.03 | -0.10 ± 0.02 |
| Archaea  | <i>Methanocaldococcus jannaschii</i>       | -0.05 ± 0.03 | -0.01 ± 0.03 | 0.01 ± 0.02  | -0.02 ± 0.02 | 0.00 ± 0.02  | 0.01 ± 0.02  | 0.01 ± 0.02  | 0.03 ± 0.02  | 0.01 ± 0.03  | 0.02 ± 0.02  | 0.01 ± 0.02  | 0.01 ± 0.02  | 0.01 ± 0.02  |
| Archaea  | <i>Methanococcoides burtonii</i>           | 0.27 ± 0.02  | 0.16 ± 0.02  | -0.05 ± 0.02 | -0.14 ± 0.02 | -0.16 ± 0.02 | -0.14 ± 0.02 | -0.14 ± 0.02 | -0.17 ± 0.02 | -0.10 ± 0.02 | -0.12 ± 0.02 | -0.09 ± 0.02 | -0.08 ± 0.02 | -0.09 ± 0.02 |
| Archaea  | <i>Methanococcus aeolicus</i>              | 0.08 ± 0.03  | 0.06 ± 0.03  | -0.08 ± 0.03 | -0.14 ± 0.03 | -0.08 ± 0.03 | -0.06 ± 0.03 | -0.07 ± 0.03 | -0.11 ± 0.03 | -0.13 ± 0.03 | -0.10 ± 0.03 | -0.12 ± 0.03 | -0.13 ± 0.03 | -0.07 ± 0.03 |
| Archaea  | <i>Methanocorpusculum labreanum</i>        | 0.40 ± 0.02  | 0.20 ± 0.02  | -0.05 ± 0.03 | -0.13 ± 0.03 | -0.05 ± 0.03 | -0.08 ± 0.03 | -0.10 ± 0.03 | -0.13 ± 0.03 | -0.10 ± 0.03 | -0.11 ± 0.03 | -0.11 ± 0.03 | -0.10 ± 0.03 | -0.10 ± 0.03 |
| Archaea  | <i>Methanoculleus marisnigri</i>           | 0.49 ± 0.02  | 0.35 ± 0.02  | 0.14 ± 0.02  | 0.02 ± 0.02  | 0.02 ± 0.02  | 0.01 ± 0.02  | 0.00 ± 0.02  | -0.05 ± 0.02 | -0.04 ± 0.02 | -0.04 ± 0.02 | -0.09 ± 0.02 | -0.06 ± 0.02 | -0.05 ± 0.02 |
| Archaea  | <i>Methanopyrus kandleri</i>               | 0.05 ± 0.02  | 0.05 ± 0.03  | 0.06 ± 0.03  | 0.01 ± 0.02  | 0.01 ± 0.02  | 0.01 ± 0.03  | -0.01 ± 0.02 | -0.02 ± 0.03 | 0.02 ± 0.02  | -0.02 ± 0.02 | 0.00 ± 0.02  | 0.03 ± 0.02  | -0.02 ± 0.02 |
| Archaea  | <i>Methanosacta thermophila</i>            | 0.21 ± 0.02  | 0.15 ± 0.02  | 0.05 ± 0.02  | -0.06 ± 0.03 | -0.09 ± 0.02 | -0.11 ± 0.03 | -0.12 ± 0.03 | -0.09 ± 0.02 | -0.07 ± 0.02 | -0.07 ± 0.02 | -0.09 ± 0.03 | -0.07 ± 0.03 | -0.09 ± 0.03 |
| Archaea  | <i>Methanosarcina acetivorans</i>          | 0.16 ± 0.01  | 0.14 ± 0.01  | 0.04 ± 0.02  | -0.01 ± 0.02 | -0.02 ± 0.02 | -0.07 ± 0.02 | -0.09 ± 0.02 | -0.07 ± 0.02 | -0.08 ± 0.02 | -0.04 ± 0.02 | -0.06 ± 0.01 | -0.08 ± 0.02 | -0.05 ± 0.02 |
| Archaea  | <i>Methanosphaera stadtmanae</i>           | 0.06 ± 0.03  | -0.01 ± 0.03 | -0.12 ± 0.03 | -0.14 ± 0.03 | -0.10 ± 0.03 | -0.10 ± 0.03 | -0.08 ± 0.03 | -0.10 ± 0.03 | -0.14 ± 0.03 | -0.09 ± 0.03 | -0.15 ± 0.03 | -0.13 ± 0.03 | -0.06 ± 0.02 |
| Archaea  | <i>Methanosphaerula palustris</i>          | 0.45 ± 0.02  | 0.31 ± 0.02  | 0.07 ± 0.02  | 0.02 ± 0.02  | 0.01 ± 0.02  | 0.03 ± 0.02  | -0.05 ± 0.02 | -0.01 ± 0.02 | -0.02 ± 0.02 | -0.02 ± 0.02 | -0.07 ± 0.02 | -0.10 ± 0.02 | -0.07 ± 0.02 |
| Archaea  | <i>Methanospirillum hungatei</i>           | 0.15 ± 0.02  | 0.04 ± 0.02  | -0.05 ± 0.02 | -0.10 ± 0.02 | -0.08 ± 0.02 | -0.08 ± 0.02 | -0.06 ± 0.02 | -0.05 ± 0.02 | -0.05 ± 0.02 | -0.03 ± 0.02 | -0.04 ± 0.02 | -0.05 ± 0.02 | -0.07 ± 0.02 |
| Archaea  | <i>Methanothermobacter thermotrophicus</i> | 0.28 ± 0.02  | 0.20 ± 0.02  | 0.10 ± 0.02  | -0.01 ± 0.02 | -0.08 ± 0.03 | -0.12 ± 0.02 | -0.11 ± 0.02 | -0.05 ± 0.02 | -0.09 ± 0.02 | -0.13 ± 0.02 | -0.17 ± 0.02 | -0.10 ± 0.02 | -0.11 ± 0.02 |
| Archaea  | <i>Nanoarchaeum equitans</i>               | -0.24 ± 0.05 | -0.08 ± 0.05 | -0.07 ± 0.05 | -0.03 ± 0.05 | -0.08 ± 0.04 | -0.03 ± 0.04 | -0.03 ± 0.04 | -0.06 ± 0.05 | -0.06 ± 0.04 | -0.06 ± 0.04 | -0.08 ± 0.05 | -0.10 ± 0.04 | -0.04 ± 0.04 |
| Archaea  | <i>Natronomonas pharaonis</i>              | 0.31 ± 0.02  | 0.11 ± 0.02  | -0.03 ± 0.02 | -0.10 ± 0.02 | -0.12 ± 0.02 | -0.13 ± 0.02 | -0.13 ± 0.02 | -0.13 ± 0.02 | -0.10 ± 0.02 | -0.08 ± 0.02 | -0.12 ± 0.02 | -0.11 ± 0.02 | -0.10 ± 0.02 |
| Archaea  | <i>Nitrosopumilus maritimus</i>            | -0.04 ± 0.02 | -0.08 ± 0.03 | -0.23 ± 0.03 | -0.24 ± 0.03 | -0.16 ± 0.03 | -0.16 ± 0.03 | -0.10 ± 0.02 | -0.12 ± 0.02 | -0.08 ± 0.03 | -0.12 ± 0.02 | -0.09 ± 0.02 | -0.06 ± 0.02 | -0.08 ± 0.02 |
| Archaea  | <i>Picrophilus torridus</i>                | 0.01 ± 0.03  | -0.03 ± 0.03 | -0.08 ± 0.03 | -0.13 ± 0.03 | -0.13 ± 0.03 | -0.16 ± 0.03 | -0.13 ± 0.03 | -0.12 ± 0.03 | -0.14 ± 0.03 | -0.10 ± 0.03 | -0.12 ± 0.03 | -0.11 ± 0.03 | -0.12 ± 0.03 |
| Archaea  | <i>Pyrobaculum aerophilum</i>              | 0.06 ± 0.02  | 0.06 ± 0.02  | -0.02 ± 0.02 | -0.03 ± 0.02 | -0.01 ± 0.02 | -0.01 ± 0.02 | 0.01 ± 0.02  | -0.04 ± 0.02 | -0.04 ± 0.02 | -0.05 ± 0.02 | -0.03 ± 0.02 | -0.04 ± 0.02 | -0.05 ± 0.02 |
| Archaea  | <i>Pyrococcus abyssi</i>                   | 0.00 ± 0.02  | 0.00 ± 0.02  | -0.04 ± 0.02 | -0.04 ± 0.02 | -0.02 ± 0.02 | 0.00 ± 0.02  | -0.03 ± 0.02 | -0.07 ± 0.02 | -0.02 ± 0.02 | -0.05 ± 0.02 | -0.01 ± 0.02 | -0.02 ± 0.02 | -0.02 ± 0.02 |
| Archaea  | <i>Staphylothermus marinus</i>             | -0.08 ± 0.03 | -0.01 ± 0.03 | -0.02 ± 0.03 | -0.06 ± 0.03 | -0.06 ± 0.03 | -0.03 ± 0.03 | -0.03 ± 0.02 | -0.01 ± 0.03 | -0.05 ± 0.03 | 0.03 ± 0.02  | 0.01 ± 0.03  | -0.06 ± 0.03 | -0.02 ± 0.03 |
| Archaea  | <i>Sulfolobus acidocaldarius</i>           | 0.02 ± 0.02  | 0.04 ± 0.02  | 0.06 ± 0.02  | 0.00 ± 0.02  | 0.04 ± 0.02  | -0.02 ± 0.02 | 0.02 ± 0.02  | 0.02 ± 0.02  | 0.00 ± 0.02  | -0.01 ± 0.02 | 0.00 ± 0.02  | -0.02 ± 0.02 | -0.02 ± 0.02 |
| Archaea  | <i>Thermococcus gammatolerans</i>          | 0.14 ± 0.02  | 0.09 ± 0.02  | 0.03 ± 0.02  | -0.03 ± 0.02 | -0.07 ± 0.02 | -0.07 ± 0.02 | -0.05 ± 0.02 | -0.01 ± 0.02 | -0.01 ± 0.02 | -0.02 ± 0.02 | -0.04 ± 0.02 | 0.00 ± 0.02  | 0.01 ± 0.02  |
| Archaea  | <i>Thermoflum pendens</i>                  | 0.18 ± 0.02  | 0.18 ± 0.02  | 0.06 ± 0.02  | 0.03 ± 0.02  | -0.01 ± 0.02 | 0.04 ± 0.02  | 0.01 ± 0.02  | -0.02 ± 0.02 | 0.00 ± 0.02  | 0.02 ± 0.02  | -0.01 ± 0.02 | -0.01 ± 0.02 | 0.00 ± 0.02  |
| Archaea  | <i>Thermoplasma acidophilum</i>            | 0.11 ± 0.03  | 0.06 ± 0.03  | -0.05 ± 0.03 | -0.03 ± 0.03 | -0.05 ± 0.03 | -0.02 ± 0.03 | -0.03 ± 0.03 | -0.04 ± 0.03 | -0.10 ± 0.03 | -0.05 ± 0.03 | -0.06 ± 0.03 | -0.05 ± 0.03 | -0.07 ± 0.03 |
| Archaea  | <i>Thermoproteus neutrophilus</i>          | 0.08 ± 0.02  | 0.09 ± 0.02  | 0.05 ± 0.02  | 0.04 ± 0.02  | 0.02 ± 0.02  | 0.02 ± 0.02  | 0.02 ± 0.02  | -0.03 ± 0.02 | -0.05 ± 0.02 | 0.00 ± 0.02  | -0.01 ± 0.02 | 0.00 ± 0.02  | 0.01 ± 0.02  |

Continued on next page



| Type   | Species                          | Window 1     | Window 2     | Window 3     | Window 4     | Window 5     | Window 6     | Window 7     | Window 8     | Window 9     | Window 10    | Window 11    | Window 12    | Window 13    |
|--------|----------------------------------|--------------|--------------|--------------|--------------|--------------|--------------|--------------|--------------|--------------|--------------|--------------|--------------|--------------|
| Fungi  | <i>Aspergillus fumigatus</i>     | 0.20 ± 0.01  | 0.06 ± 0.01  | -0.11 ± 0.01 | -0.07 ± 0.01 | 0.03 ± 0.01  | 0.10 ± 0.01  | 0.13 ± 0.01  | 0.15 ± 0.01  | 0.12 ± 0.01  | 0.10 ± 0.01  | 0.13 ± 0.01  | 0.14 ± 0.01  | 0.12 ± 0.01  |
| Fungi  | <i>Candida dubliniensis</i>      | 0.17 ± 0.01  | 0.01 ± 0.01  | -0.21 ± 0.02 | -0.17 ± 0.01 | -0.12 ± 0.01 | -0.10 ± 0.01 | -0.08 ± 0.01 | -0.08 ± 0.01 | -0.04 ± 0.01 | -0.02 ± 0.01 | -0.01 ± 0.01 | -0.02 ± 0.01 | -0.02 ± 0.01 |
| Fungi  | <i>Cryptococcus neoformans</i>   | 0.21 ± 0.01  | 0.11 ± 0.01  | -0.03 ± 0.01 | -0.04 ± 0.01 | 0.01 ± 0.01  | 0.06 ± 0.01  | 0.06 ± 0.01  | 0.07 ± 0.01  | 0.09 ± 0.01  | 0.06 ± 0.01  | 0.08 ± 0.01  | 0.07 ± 0.01  | 0.07 ± 0.01  |
| Fungi  | <i>Debaryomyces hansenii</i>     | 0.13 ± 0.01  | -0.04 ± 0.01 | -0.25 ± 0.01 | -0.23 ± 0.01 | -0.19 ± 0.01 | -0.13 ± 0.01 | -0.10 ± 0.01 | -0.08 ± 0.01 | -0.05 ± 0.01 | -0.02 ± 0.01 | -0.04 ± 0.01 | -0.04 ± 0.01 | -0.01 ± 0.01 |
| Fungi  | <i>Encephalitozoon cuniculi</i>  | 0.15 ± 0.02  | 0.13 ± 0.02  | 0.08 ± 0.02  | 0.00 ± 0.02  | 0.00 ± 0.02  | -0.08 ± 0.02 | -0.07 ± 0.02 | -0.05 ± 0.02 | -0.07 ± 0.02 | -0.03 ± 0.02 | -0.05 ± 0.02 | -0.02 ± 0.02 | -0.01 ± 0.02 |
| Fungi  | <i>Eremothecium gossypii</i>     | 0.40 ± 0.01  | 0.24 ± 0.02  | 0.04 ± 0.02  | -0.09 ± 0.02 | -0.10 ± 0.02 | -0.09 ± 0.02 | -0.05 ± 0.02 | -0.07 ± 0.02 | -0.08 ± 0.02 | -0.08 ± 0.02 | -0.09 ± 0.02 | -0.09 ± 0.02 | -0.10 ± 0.02 |
| Fungi  | <i>Kluyveromyces lactis</i>      | 0.11 ± 0.01  | -0.14 ± 0.02 | -0.33 ± 0.02 | -0.33 ± 0.02 | -0.25 ± 0.02 | -0.19 ± 0.02 | -0.13 ± 0.01 | -0.11 ± 0.01 | -0.08 ± 0.01 | -0.10 ± 0.01 | -0.08 ± 0.01 | -0.09 ± 0.01 | -0.11 ± 0.01 |
| Fungi  | <i>Pichia stipitis</i>           | 0.07 ± 0.01  | -0.18 ± 0.02 | -0.45 ± 0.02 | -0.41 ± 0.02 | -0.34 ± 0.02 | -0.28 ± 0.02 | -0.21 ± 0.02 | -0.13 ± 0.01 | -0.10 ± 0.01 | -0.09 ± 0.01 | -0.05 ± 0.01 | -0.06 ± 0.01 | -0.07 ± 0.01 |
| Fungi  | <i>Saccharomyces cerevisiae</i>  | 0.14 ± 0.01  | 0.00 ± 0.01  | -0.17 ± 0.01 | -0.18 ± 0.01 | -0.18 ± 0.01 | -0.12 ± 0.01 | -0.09 ± 0.01 | -0.09 ± 0.01 | -0.08 ± 0.01 | -0.06 ± 0.01 | -0.06 ± 0.01 | -0.07 ± 0.01 | -0.09 ± 0.01 |
| Fungi  | <i>Schizosaccharomyces pombe</i> | 0.00 ± 0.01  | -0.06 ± 0.02 | -0.19 ± 0.02 | -0.21 ± 0.02 | -0.18 ± 0.02 | -0.15 ± 0.02 | -0.13 ± 0.02 | -0.08 ± 0.01 | -0.08 ± 0.01 | -0.08 ± 0.01 | -0.06 ± 0.01 | -0.06 ± 0.01 | -0.02 ± 0.01 |
| Fungi  | <i>Yarrowia lipolytica</i>       | 0.29 ± 0.01  | 0.06 ± 0.01  | -0.26 ± 0.01 | -0.35 ± 0.01 | -0.28 ± 0.01 | -0.22 ± 0.01 | -0.20 ± 0.01 | -0.13 ± 0.01 | -0.06 ± 0.01 | -0.09 ± 0.01 | -0.10 ± 0.01 | -0.08 ± 0.01 | -0.07 ± 0.01 |
| Plant  | <i>Arabidopsis thaliana</i>      | 0.03 ± 0.01  | 0.01 ± 0.01  | -0.05 ± 0.01 | -0.05 ± 0.01 | -0.02 ± 0.01 | -0.01 ± 0.01 | 0.01 ± 0.01  | 0.01 ± 0.01  | 0.00 ± 0.01  | 0.01 ± 0.01  | 0.01 ± 0.01  | 0.00 ± 0.01  | 0.00 ± 0.01  |
| Plant  | <i>Oryza sativa</i>              | -0.09 ± 0.01 | -0.15 ± 0.01 | -0.23 ± 0.01 | -0.25 ± 0.01 | -0.24 ± 0.01 | -0.24 ± 0.01 | -0.22 ± 0.01 | -0.21 ± 0.01 | -0.21 ± 0.01 | -0.19 ± 0.01 | -0.20 ± 0.01 | -0.19 ± 0.01 | -0.19 ± 0.01 |
| Insect | <i>Anopheles gambiae</i>         | 0.35 ± 0.01  | 0.23 ± 0.01  | 0.05 ± 0.01  | 0.00 ± 0.01  | 0.03 ± 0.01  | 0.08 ± 0.01  | 0.09 ± 0.01  | 0.07 ± 0.01  | 0.06 ± 0.01  | 0.05 ± 0.01  | 0.05 ± 0.01  | 0.04 ± 0.01  | 0.02 ± 0.01  |
| Insect | <i>Drosophila melanogaster</i>   | 0.19 ± 0.01  | 0.07 ± 0.01  | -0.13 ± 0.01 | -0.16 ± 0.01 | -0.10 ± 0.01 | -0.06 ± 0.01 | -0.08 ± 0.01 | -0.08 ± 0.01 | -0.07 ± 0.01 | -0.07 ± 0.01 | -0.07 ± 0.01 | -0.06 ± 0.01 | -0.08 ± 0.01 |
| Fish   | <i>Danio rerio</i>               | 0.06 ± 0.01  | 0.02 ± 0.01  | -0.11 ± 0.01 | -0.11 ± 0.01 | -0.05 ± 0.01 | -0.02 ± 0.01 | -0.02 ± 0.01 | -0.03 ± 0.01 | 0.00 ± 0.01  | -0.03 ± 0.01 | -0.02 ± 0.01 | -0.01 ± 0.01 | -0.02 ± 0.01 |
| Fish   | <i>Gasterosteus aculeatus</i>    | 0.13 ± 0.01  | 0.06 ± 0.01  | -0.03 ± 0.01 | -0.06 ± 0.01 | -0.03 ± 0.01 | -0.02 ± 0.01 | -0.02 ± 0.01 | -0.01 ± 0.01 | -0.01 ± 0.01 | -0.02 ± 0.01 | -0.03 ± 0.01 | -0.05 ± 0.01 | -0.05 ± 0.01 |
| Fish   | <i>Oryzias latipes</i>           | 0.06 ± 0.01  | 0.01 ± 0.01  | -0.10 ± 0.01 | -0.10 ± 0.01 | -0.06 ± 0.01 | -0.03 ± 0.01 | -0.03 ± 0.01 | -0.06 ± 0.01 | -0.07 ± 0.01 | -0.07 ± 0.01 | -0.06 ± 0.01 | -0.07 ± 0.01 | -0.06 ± 0.01 |
| Fish   | <i>Takifugu rubripes</i>         | 0.13 ± 0.01  | 0.07 ± 0.01  | -0.07 ± 0.01 | -0.07 ± 0.01 | -0.01 ± 0.01 | 0.02 ± 0.01  | 0.01 ± 0.01  | 0.00 ± 0.01  | -0.01 ± 0.01 | 0.00 ± 0.01  | 0.00 ± 0.01  | -0.02 ± 0.01 | -0.03 ± 0.01 |
| Bird   | <i>Gallus gallus</i>             | -0.28 ± 0.01 | -0.34 ± 0.01 | -0.39 ± 0.01 | -0.36 ± 0.01 | -0.33 ± 0.01 | -0.32 ± 0.01 | -0.27 ± 0.01 | -0.25 ± 0.01 | -0.22 ± 0.01 | -0.21 ± 0.01 | -0.23 ± 0.01 | -0.20 ± 0.01 | -0.17 ± 0.01 |
| Bird   | <i>Taeniopygia guttata</i>       | -0.23 ± 0.02 | -0.28 ± 0.02 | -0.35 ± 0.02 | -0.33 ± 0.02 | -0.29 ± 0.02 | -0.25 ± 0.02 | -0.24 ± 0.01 | -0.19 ± 0.01 | -0.18 ± 0.01 | -0.15 ± 0.01 | -0.15 ± 0.01 | -0.17 ± 0.01 | -0.14 ± 0.01 |
| Mammal | <i>Bos taurus</i>                | -0.11 ± 0.01 | -0.19 ± 0.01 | -0.26 ± 0.01 | -0.25 ± 0.01 | -0.22 ± 0.01 | -0.17 ± 0.01 | -0.13 ± 0.01 | -0.12 ± 0.01 | -0.14 ± 0.01 | -0.12 ± 0.01 | -0.12 ± 0.01 | -0.10 ± 0.01 | -0.09 ± 0.01 |
| Mammal | <i>Canis familiaris</i>          | -0.17 ± 0.01 | -0.24 ± 0.01 | -0.31 ± 0.01 | -0.30 ± 0.01 | -0.26 ± 0.01 | -0.20 ± 0.01 | -0.17 ± 0.01 | -0.18 ± 0.01 | -0.18 ± 0.01 | -0.14 ± 0.01 | -0.13 ± 0.01 | -0.12 ± 0.01 | -0.12 ± 0.01 |
| Mammal | <i>Equus caballus</i>            | -0.11 ± 0.01 | -0.16 ± 0.01 | -0.24 ± 0.01 | -0.20 ± 0.01 | -0.17 ± 0.01 | -0.14 ± 0.01 | -0.11 ± 0.01 | -0.10 ± 0.01 | -0.11 ± 0.01 | -0.11 ± 0.01 | -0.11 ± 0.01 | -0.12 ± 0.01 | -0.10 ± 0.01 |
| Mammal | <i>Homo sapiens</i>              | -0.17 ± 0.01 | -0.22 ± 0.01 | -0.26 ± 0.01 | -0.25 ± 0.01 | -0.23 ± 0.01 | -0.20 ± 0.01 | -0.16 ± 0.01 | -0.15 ± 0.01 | -0.15 ± 0.01 | -0.14 ± 0.01 | -0.14 ± 0.01 | -0.12 ± 0.01 | -0.12 ± 0.01 |
| Mammal | <i>Loxodonta africana</i>        | -0.08 ± 0.02 | -0.18 ± 0.02 | -0.24 ± 0.02 | -0.22 ± 0.02 | -0.16 ± 0.02 | -0.17 ± 0.02 | -0.15 ± 0.02 | -0.15 ± 0.02 | -0.13 ± 0.02 | -0.11 ± 0.02 | -0.10 ± 0.02 | -0.12 ± 0.02 | -0.08 ± 0.02 |
| Mammal | <i>Mus musculus</i>              | -0.16 ± 0.01 | -0.19 ± 0.01 | -0.25 ± 0.01 | -0.24 ± 0.01 | -0.20 ± 0.01 | -0.18 ± 0.01 | -0.15 ± 0.01 | -0.12 ± 0.01 | -0.13 ± 0.01 | -0.12 ± 0.01 | -0.11 ± 0.01 | -0.10 ± 0.01 | -0.10 ± 0.01 |
| Mammal | <i>Pteropus vampyrus</i>         | -0.14 ± 0.01 | -0.21 ± 0.01 | -0.26 ± 0.01 | -0.26 ± 0.01 | -0.21 ± 0.01 | -0.19 ± 0.01 | -0.17 ± 0.01 | -0.16 ± 0.01 | -0.14 ± 0.01 | -0.14 ± 0.01 | -0.11 ± 0.01 | -0.12 ± 0.01 | -0.11 ± 0.01 |
| Mammal | <i>Tursiops truncatus</i>        | -0.12 ± 0.01 | -0.19 ± 0.01 | -0.25 ± 0.01 | -0.26 ± 0.01 | -0.23 ± 0.01 | -0.18 ± 0.01 | -0.15 ± 0.01 | -0.15 ± 0.01 | -0.13 ± 0.01 | -0.11 ± 0.01 | -0.11 ± 0.01 | -0.10 ± 0.01 | -0.11 ± 0.01 |
