# Supplementary material for: A Universal Trend of Reduced mRNA Stability near the Translation-Initiation Site in Prokaryotes and Eukaryotes
Source: PubMed Central journal article supplement (PMC2816680; doi:10.1371/journal.pcbi.1000664), 2010-02-05
Supplement: pcbi.1000664.s002.pdf [file pcbi.1000664.s002.pdf]

Table S2: Mean and standard error of  $\Delta G$  for each window

| Type     | Species                                | Window 1     | Window 2     | Window 3     | Window 4     | Window 5     | Window 6     | Window 7     | Window 8     | Window 9     | Window 10    | Window 11    | Window 12    | Window 13    |
|----------|----------------------------------------|--------------|--------------|--------------|--------------|--------------|--------------|--------------|--------------|--------------|--------------|--------------|--------------|--------------|
| Bacteria | <i>Acaryochloris marina</i>            | -2.58 ± 0.03 | -2.83 ± 0.03 | -3.47 ± 0.04 | -3.96 ± 0.04 | -3.97 ± 0.04 | -3.99 ± 0.04 | -4.00 ± 0.04 | -3.92 ± 0.04 | -3.93 ± 0.04 | -3.94 ± 0.04 | -3.93 ± 0.04 | -3.92 ± 0.03 | -3.93 ± 0.04 |
| Bacteria | <i>Acholeplasma laidlawii</i>          | -1.29 ± 0.04 | -1.64 ± 0.05 | -2.13 ± 0.06 | -2.29 ± 0.06 | -2.17 ± 0.06 | -2.41 ± 0.06 | -2.34 ± 0.06 | -2.25 ± 0.06 | -2.36 ± 0.06 | -2.32 ± 0.06 | -2.26 ± 0.06 | -2.35 ± 0.06 | -2.32 ± 0.06 |
| Bacteria | <i>Acidiphilium cryptum</i>            | -5.03 ± 0.06 | -6.14 ± 0.07 | -7.43 ± 0.07 | -7.89 ± 0.07 | -8.12 ± 0.07 | -8.22 ± 0.07 | -8.10 ± 0.07 | -8.15 ± 0.07 | -8.03 ± 0.07 | -7.96 ± 0.07 | -7.88 ± 0.07 | -7.92 ± 0.07 | -7.75 ± 0.07 |
| Bacteria | <i>Acidithiobacillus ferrooxidans</i>  | -3.76 ± 0.05 | -4.53 ± 0.06 | -5.44 ± 0.06 | -6.01 ± 0.06 | -6.08 ± 0.06 | -6.21 ± 0.06 | -6.07 ± 0.06 | -5.99 ± 0.06 | -6.04 ± 0.06 | -5.91 ± 0.06 | -5.94 ± 0.06 | -6.01 ± 0.06 | -5.89 ± 0.06 |
| Bacteria | <i>Acidobacteria bacterium</i>         | -3.78 ± 0.04 | -4.12 ± 0.04 | -4.86 ± 0.04 | -5.44 ± 0.05 | -5.69 ± 0.05 | -5.71 ± 0.05 | -5.67 ± 0.05 | -5.66 ± 0.05 | -5.59 ± 0.05 | -5.62 ± 0.04 | -5.67 ± 0.04 | -5.70 ± 0.04 | -5.68 ± 0.04 |
| Bacteria | <i>Acidobacterium capsulatum</i>       | -3.96 ± 0.05 | -4.49 ± 0.06 | -5.42 ± 0.06 | -6.01 ± 0.06 | -6.17 ± 0.06 | -6.35 ± 0.06 | -6.34 ± 0.06 | -6.35 ± 0.06 | -6.40 ± 0.06 | -6.31 ± 0.06 | -6.27 ± 0.06 | -6.30 ± 0.06 | -6.28 ± 0.06 |
| Bacteria | <i>Acidothermus cellulolyticus</i>     | -6.19 ± 0.06 | -6.87 ± 0.07 | -7.75 ± 0.08 | -7.81 ± 0.08 | -7.80 ± 0.07 | -7.81 ± 0.08 | -7.75 ± 0.08 | -7.68 ± 0.07 | -7.73 ± 0.08 | -7.59 ± 0.07 | -7.59 ± 0.07 | -7.67 ± 0.07 | -7.54 ± 0.07 |
| Bacteria | <i>Acidovorax citrulli</i>             | -4.02 ± 0.05 | -5.31 ± 0.05 | -6.94 ± 0.06 | -7.63 ± 0.06 | -7.89 ± 0.06 | -8.02 ± 0.06 | -8.01 ± 0.06 | -8.06 ± 0.06 | -8.07 ± 0.05 | -8.04 ± 0.05 | -8.08 ± 0.05 | -8.10 ± 0.05 | -7.99 ± 0.05 |
| Bacteria | <i>Acinetobacter baumannii</i>         | -2.02 ± 0.03 | -2.37 ± 0.04 | -2.97 ± 0.04 | -3.18 ± 0.04 | -3.24 ± 0.04 | -3.18 ± 0.04 | -3.10 ± 0.04 | -3.02 ± 0.04 | -3.05 ± 0.04 | -3.01 ± 0.04 | -2.96 ± 0.04 | -3.03 ± 0.04 | -3.10 ± 0.04 |
| Bacteria | <i>Actinobacillus pleuropneumoniae</i> | -1.71 ± 0.04 | -2.32 ± 0.05 | -3.23 ± 0.06 | -3.42 ± 0.06 | -3.35 ± 0.06 | -3.39 ± 0.06 | -3.31 ± 0.06 | -3.29 ± 0.06 | -3.40 ± 0.06 | -3.41 ± 0.06 | -3.44 ± 0.06 | -3.44 ± 0.06 | -3.50 ± 0.06 |
| Bacteria | <i>Aeromonas hydrophila</i>            | -3.44 ± 0.04 | -4.56 ± 0.05 | -5.86 ± 0.06 | -6.14 ± 0.06 | -6.37 ± 0.06 | -6.33 ± 0.06 | -6.20 ± 0.05 | -6.19 ± 0.05 | -6.35 ± 0.05 | -6.39 ± 0.05 | -6.50 ± 0.06 | -6.60 ± 0.05 | -6.47 ± 0.05 |
| Bacteria | <i>Agrobacterium radiobacter</i>       | -3.58 ± 0.03 | -4.41 ± 0.04 | -5.66 ± 0.04 | -6.16 ± 0.04 | -6.36 ± 0.04 | -6.35 ± 0.04 | -6.29 ± 0.04 | -6.19 ± 0.04 | -6.29 ± 0.04 | -6.28 ± 0.04 | -6.24 ± 0.04 | -6.33 ± 0.04 | -6.25 ± 0.04 |
| Bacteria | <i>Akkermansia muciniphila</i>         | -2.40 ± 0.05 | -3.30 ± 0.06 | -4.87 ± 0.07 | -5.68 ± 0.08 | -5.76 ± 0.08 | -5.73 ± 0.07 | -5.54 ± 0.07 | -5.48 ± 0.07 | -5.40 ± 0.07 | -5.42 ± 0.07 | -5.37 ± 0.07 | -5.44 ± 0.07 | -5.40 ± 0.07 |
| Bacteria | <i>Alcanivorax borkumensis</i>         | -3.20 ± 0.05 | -3.97 ± 0.06 | -5.01 ± 0.06 | -5.41 ± 0.06 | -5.48 ± 0.06 | -5.51 ± 0.06 | -5.51 ± 0.06 | -5.45 ± 0.06 | -5.35 ± 0.06 | -5.24 ± 0.06 | -5.22 ± 0.06 | -5.41 ± 0.06 | -5.33 ± 0.06 |
| Bacteria | <i>Aliivibrio salmonicida</i>          | -1.54 ± 0.03 | -2.05 ± 0.03 | -2.77 ± 0.04 | -2.91 ± 0.04 | -3.22 ± 0.04 | -3.30 ± 0.05 | -3.13 ± 0.04 | -2.82 ± 0.04 | -2.91 ± 0.04 | -2.96 ± 0.04 | -3.00 ± 0.04 | -3.18 ± 0.04 | -3.16 ± 0.04 |
| Bacteria | <i>Alkalitimonella ehrlichii</i>       | -4.47 ± 0.05 | -5.46 ± 0.06 | -6.91 ± 0.07 | -7.63 ± 0.07 | -7.99 ± 0.07 | -8.07 ± 0.07 | -7.99 ± 0.07 | -8.02 ± 0.07 | -7.96 ± 0.07 | -7.80 ± 0.07 | -7.85 ± 0.07 | -7.89 ± 0.07 | -7.71 ± 0.07 |
| Bacteria | <i>Alkaliphilus metalliredigens</i>    | -1.53 ± 0.02 | -1.80 ± 0.03 | -2.13 ± 0.03 | -2.31 ± 0.03 | -2.37 ± 0.03 | -2.44 ± 0.03 | -2.55 ± 0.03 | -2.49 ± 0.03 | -2.53 ± 0.03 | -2.51 ± 0.03 | -2.58 ± 0.03 | -2.57 ± 0.03 | -2.48 ± 0.03 |
| Bacteria | <i>Alteromonas macleodii</i>           | -2.48 ± 0.04 | -2.80 ± 0.04 | -3.53 ± 0.05 | -3.68 ± 0.04 | -3.78 ± 0.04 | -3.88 ± 0.04 | -3.74 ± 0.04 | -3.75 ± 0.04 | -3.72 ± 0.04 | -3.67 ± 0.04 | -3.75 ± 0.04 | -3.70 ± 0.04 | -3.69 ± 0.04 |
| Bacteria | <i>Anabaena variabilis</i>             | -2.03 ± 0.03 | -2.22 ± 0.03 | -2.78 ± 0.03 | -3.13 ± 0.04 | -3.32 ± 0.04 | -3.33 ± 0.04 | -3.24 ± 0.04 | -3.16 ± 0.03 | -3.19 ± 0.03 | -3.21 ± 0.03 | -3.16 ± 0.03 | -3.16 ± 0.03 | -3.19 ± 0.03 |
| Bacteria | <i>Anaerocellum thermophilum</i>       | -1.78 ± 0.03 | -1.97 ± 0.04 | -2.18 ± 0.04 | -2.29 ± 0.04 | -2.22 ± 0.04 | -2.20 ± 0.04 | -2.28 ± 0.04 | -2.26 ± 0.04 | -2.28 ± 0.04 | -2.33 ± 0.04 | -2.35 ± 0.04 | -2.33 ± 0.04 | -2.36 ± 0.04 |
| Bacteria | <i>Anaeromyxobacter dehalogenans</i>   | -5.99 ± 0.05 | -6.98 ± 0.05 | -8.35 ± 0.06 | -9.11 ± 0.06 | -9.38 ± 0.06 | -9.71 ± 0.06 | -9.49 ± 0.06 | -9.53 ± 0.06 | -9.65 ± 0.06 | -9.53 ± 0.06 | -9.48 ± 0.06 | -9.51 ± 0.06 | -9.30 ± 0.06 |
| Bacteria | <i>Anaplasma marginale</i>             | -3.71 ± 0.08 | -3.77 ± 0.09 | -4.23 ± 0.09 | -4.44 ± 0.09 | -4.42 ± 0.09 | -4.69 ± 0.09 | -4.82 ± 0.09 | -4.89 ± 0.10 | -4.54 ± 0.09 | -4.53 ± 0.09 | -4.32 ± 0.09 | -4.42 ± 0.09 | -4.40 ± 0.09 |
| Bacteria | <i>Anoxybacillus flavithermus</i>      | -2.42 ± 0.04 | -2.47 ± 0.04 | -2.72 ± 0.05 | -2.80 ± 0.05 | -2.88 ± 0.05 | -2.95 ± 0.05 | -2.99 ± 0.05 | -2.97 ± 0.05 | -3.03 ± 0.05 | -3.01 ± 0.05 | -2.99 ± 0.05 | -3.08 ± 0.05 | -3.09 ± 0.05 |
| Bacteria | <i>Aquifex aeolicus</i>                | -2.58 ± 0.05 | -2.75 ± 0.06 | -2.94 ± 0.07 | -3.07 ± 0.07 | -3.21 ± 0.07 | -3.14 ± 0.07 | -2.95 ± 0.06 | -2.94 ± 0.06 | -2.99 ± 0.06 | -3.11 ± 0.06 | -3.12 ± 0.06 | -3.10 ± 0.07 | -3.14 ± 0.06 |
| Bacteria | <i>Archaeoglobus fulgidus</i>          | -3.26 ± 0.05 | -3.47 ± 0.05 | -3.71 ± 0.05 | -3.72 ± 0.05 | -3.85 ± 0.06 | -3.85 ± 0.06 | -3.90 ± 0.06 | -3.84 ± 0.05 | -3.87 ± 0.05 | -3.88 ± 0.05 | -3.79 ± 0.06 | -3.83 ± 0.05 | -3.75 ± 0.05 |
| Bacteria | <i>Arcobacter butzleri</i>             | -1.07 ± 0.03 | -1.26 ± 0.03 | -1.76 ± 0.04 | -1.93 ± 0.05 | -1.95 ± 0.05 | -1.90 ± 0.04 | -1.82 ± 0.04 | -1.73 ± 0.04 | -1.71 ± 0.04 | -1.76 ± 0.04 | -1.67 ± 0.04 | -1.70 ± 0.04 | -1.75 ± 0.04 |
| Bacteria | <i>Aromatoleum aromaticum</i>          | -4.44 ± 0.05 | -5.28 ± 0.05 | -6.39 ± 0.05 | -6.88 ± 0.06 | -7.09 ± 0.06 | -7.16 ± 0.05 | -7.12 ± 0.05 | -7.14 ± 0.05 | -7.11 ± 0.05 | -7.08 ± 0.05 | -7.11 ± 0.05 | -7.09 ± 0.05 | -7.06 ± 0.05 |
| Bacteria | <i>Arthrobacter aureescens</i>         | -4.28 ± 0.05 | -5.05 ± 0.05 | -5.91 ± 0.05 | -6.24 ± 0.05 | -6.23 ± 0.05 | -6.41 ± 0.05 | -6.50 ± 0.05 | -6.45 ± 0.05 | -6.46 ± 0.05 | -6.34 ± 0.05 | -6.25 ± 0.05 | -6.35 ± 0.05 | -6.29 ± 0.05 |
| Bacteria | <i>Aster yellow</i>                    | -1.04 ± 0.05 | -1.00 ± 0.06 | -1.23 ± 0.07 | -1.34 ± 0.08 | -1.28 ± 0.07 | -1.32 ± 0.07 | -1.26 ± 0.06 | -1.26 ± 0.07 | -1.38 ± 0.07 | -1.41 ± 0.07 | -1.42 ± 0.07 | -1.36 ± 0.07 | -1.49 ± 0.07 |
| Bacteria | <i>Azoarcus sp. BH72</i>               | -4.13 ± 0.05 | -5.44 ± 0.05 | -7.08 ± 0.06 | -7.54 ± 0.06 | -7.80 ± 0.06 | -7.84 ± 0.06 | -7.84 ± 0.06 | -7.74 ± 0.06 | -7.86 ± 0.06 | -7.81 ± 0.06 | -7.77 ± 0.06 | -7.77 ± 0.06 | -7.61 ± 0.06 |
| Bacteria | <i>Azorhizobium casulinodans</i>       | -5.13 ± 0.05 | -5.93 ± 0.05 | -6.94 ± 0.05 | -7.41 ± 0.06 | -7.57 ± 0.06 | -7.70 ± 0.05 | -7.51 ± 0.05 | -7.67 ± 0.05 | -7.64 ± 0.05 | -7.59 ± 0.05 | -7.59 ± 0.05 | -7.66 ± 0.05 | -7.52 ± 0.05 |
| Bacteria | <i>Azotobacter vinelandii</i>          | -4.08 ± 0.04 | -5.17 ± 0.05 | -6.40 ± 0.05 | -6.91 ± 0.05 | -7.12 ± 0.05 | -7.32 ± 0.05 | -7.29 ± 0.05 | -7.35 ± 0.05 | -7.36 ± 0.05 | -7.23 ± 0.05 | -7.23 ± 0.05 | -7.29 ± 0.05 | -7.25 ± 0.05 |
| Bacteria | <i>Bacillus amyloliquefaciens</i>      | -2.21 ± 0.03 | -2.74 ± 0.04 | -3.37 ± 0.05 | -3.48 ± 0.05 | -3.63 ± 0.05 | -3.67 ± 0.05 | -3.76 ± 0.05 | -3.73 ± 0.05 | -3.74 ± 0.05 | -3.80 ± 0.05 | -3.80 ± 0.05 | -3.82 ± 0.05 | -3.77 ± 0.05 |
| Bacteria | <i>Bacteroides fragilis</i>            | -1.51 ± 0.03 | -2.22 ± 0.04 | -3.58 ± 0.05 | -3.94 ± 0.05 | -3.86 ± 0.05 | -3.59 ± 0.04 | -3.46 ± 0.04 | -3.45 ± 0.04 | -3.57 ± 0.04 | -3.58 ± 0.04 | -3.55 ± 0.04 | -3.56 ± 0.04 | -3.45 ± 0.04 |
| Bacteria | <i>Bartonella bacilliformis</i>        | -2.01 ± 0.05 | -2.12 ± 0.06 | -2.72 ± 0.07 | -2.85 ± 0.07 | -3.03 ± 0.08 | -3.17 ± 0.07 | -3.04 ± 0.07 | -2.89 ± 0.07 | -2.87 ± 0.07 | -2.97 ± 0.07 | -2.86 ± 0.07 | -2.98 ± 0.07 | -2.96 ± 0.07 |
| Bacteria | <i>Baumannia cicadellinicola</i>       | -1.70 ± 0.07 | -2.16 ± 0.09 | -2.60 ± 0.10 | -2.65 ± 0.10 | -2.62 ± 0.09 | -2.56 ± 0.10 | -2.64 ± 0.10 | -2.32 ± 0.09 | -2.52 ± 0.09 | -2.46 ± 0.09 | -2.46 ± 0.09 | -2.47 ± 0.09 | -2.47 ± 0.09 |
| Bacteria | <i>Bdellovibrio bacteriovorus</i>      | -2.55 ± 0.04 | -2.93 ± 0.04 | -3.38 ± 0.05 | -3.94 ± 0.05 | -4.71 ± 0.06 | -4.76 ± 0.05 | -4.65 ± 0.05 | -4.46 ± 0.05 | -4.55 ± 0.05 | -4.46 ± 0.05 | -4.45 ± 0.05 | -4.50 ± 0.05 | -4.40 ± 0.05 |
| Bacteria | <i>Beijerinckia indica</i>             | -3.65 ± 0.04 | -4.31 ± 0.05 | -5.34 ± 0.05 | -5.77 ± 0.06 | -5.90 ± 0.06 | -5.96 ± 0.06 | -5.94 ± 0.05 | -5.90 ± 0.05 | -5.85 ± 0.05 | -5.83 ± 0.05 | -5.79 ± 0.05 | -5.80 ± 0.05 | -5.81 ± 0.05 |

Continued on next page

| Type     | Species                                     | Window 1     | Window 2     | Window 3     | Window 4     | Window 5     | Window 6     | Window 7     | Window 8     | Window 9     | Window 10    | Window 11    | Window 12    | Window 13    |
|----------|---------------------------------------------|--------------|--------------|--------------|--------------|--------------|--------------|--------------|--------------|--------------|--------------|--------------|--------------|--------------|
| Bacteria | <i>Beutenbergia cavernae</i>                | -6.37 ± 0.05 | -7.64 ± 0.06 | -8.81 ± 0.06 | -8.94 ± 0.06 | -9.09 ± 0.06 | -9.21 ± 0.06 | -9.15 ± 0.06 | -9.09 ± 0.05 | -9.13 ± 0.05 | -9.01 ± 0.05 | -9.00 ± 0.05 | -8.94 ± 0.05 | -8.88 ± 0.05 |
| Bacteria | <i>Bifidobacterium adolescentis</i>         | -4.01 ± 0.07 | -4.52 ± 0.08 | -5.39 ± 0.08 | -5.69 ± 0.08 | -5.73 ± 0.08 | -5.88 ± 0.08 | -5.80 ± 0.08 | -5.82 ± 0.08 | -5.90 ± 0.08 | -6.00 ± 0.08 | -5.78 ± 0.08 | -5.76 ± 0.08 | -5.71 ± 0.08 |
| Bacteria | <i>Bordetella avium</i>                     | -3.44 ± 0.05 | -4.71 ± 0.06 | -6.15 ± 0.06 | -6.69 ± 0.06 | -6.78 ± 0.06 | -6.83 ± 0.06 | -6.78 ± 0.06 | -6.70 ± 0.06 | -6.86 ± 0.06 | -6.74 ± 0.06 | -6.70 ± 0.06 | -6.79 ± 0.06 | -6.74 ± 0.06 |
| Bacteria | <i>Borrelia afzelii</i>                     | -1.31 ± 0.05 | -1.33 ± 0.06 | -1.54 ± 0.07 | -1.72 ± 0.07 | -1.76 ± 0.07 | -1.77 ± 0.07 | -1.69 ± 0.06 | -1.70 ± 0.07 | -1.71 ± 0.06 | -1.70 ± 0.06 | -1.73 ± 0.07 | -1.77 ± 0.07 | -1.80 ± 0.06 |
| Bacteria | <i>Brachyspira hyodysenteriae</i>           | -1.14 ± 0.03 | -1.16 ± 0.03 | -1.57 ± 0.04 | -1.71 ± 0.04 | -1.85 ± 0.04 | -1.79 ± 0.04 | -1.78 ± 0.04 | -1.73 ± 0.04 | -1.67 ± 0.04 | -1.73 ± 0.04 | -1.71 ± 0.04 | -1.74 ± 0.04 | -1.72 ± 0.04 |
| Bacteria | <i>Bradyrhizobium japonicum</i>             | -4.78 ± 0.03 | -5.32 ± 0.03 | -6.15 ± 0.04 | -6.70 ± 0.04 | -6.95 ± 0.04 | -7.07 ± 0.04 | -7.04 ± 0.04 | -6.98 ± 0.04 | -7.01 ± 0.04 | -6.96 ± 0.04 | -7.00 ± 0.04 | -6.98 ± 0.04 | -6.92 ± 0.04 |
| Bacteria | <i>Brevibacillus brevis</i>                 | -2.68 ± 0.03 | -3.05 ± 0.03 | -3.53 ± 0.03 | -3.71 ± 0.04 | -3.71 ± 0.04 | -3.78 ± 0.04 | -3.79 ± 0.03 | -3.71 ± 0.03 | -3.77 ± 0.03 | -3.75 ± 0.03 | -3.71 ± 0.03 | -3.83 ± 0.03 | -3.77 ± 0.03 |
| Bacteria | <i>Brucella abortus</i>                     | -3.46 ± 0.05 | -4.16 ± 0.05 | -5.23 ± 0.06 | -5.85 ± 0.06 | -6.07 ± 0.06 | -6.12 ± 0.06 | -5.92 ± 0.06 | -5.90 ± 0.06 | -5.89 ± 0.06 | -5.74 ± 0.06 | -5.83 ± 0.06 | -5.95 ± 0.06 | -5.98 ± 0.06 |
| Bacteria | <i>Buchnera aphidicola</i>                  | -1.17 ± 0.06 | -1.24 ± 0.07 | -1.68 ± 0.08 | -1.70 ± 0.08 | -1.78 ± 0.09 | -1.69 ± 0.08 | -1.69 ± 0.08 | -1.71 ± 0.08 | -1.61 ± 0.08 | -1.74 ± 0.08 | -1.61 ± 0.07 | -1.67 ± 0.08 | -1.63 ± 0.07 |
| Bacteria | <i>Burkholderia ambifaria</i>               | -4.02 ± 0.04 | -5.44 ± 0.04 | -7.05 ± 0.05 | -7.58 ± 0.05 | -7.72 ± 0.05 | -7.91 ± 0.05 | -7.87 ± 0.05 | -7.79 ± 0.05 | -7.86 ± 0.04 | -7.82 ± 0.05 | -7.87 ± 0.05 | -7.95 ± 0.04 | -7.88 ± 0.04 |
| Bacteria | <i>Caldicellulosiruptor saccharolyticus</i> | -1.82 ± 0.03 | -1.93 ± 0.04 | -2.14 ± 0.04 | -2.23 ± 0.04 | -2.26 ± 0.04 | -2.20 ± 0.04 | -2.33 ± 0.04 | -2.30 ± 0.04 | -2.27 ± 0.04 | -2.36 ± 0.04 | -2.31 ± 0.04 | -2.44 ± 0.04 | -2.36 ± 0.04 |
| Bacteria | <i>Campylobacter concisus</i>               | -1.81 ± 0.04 | -2.27 ± 0.05 | -3.05 ± 0.06 | -3.22 ± 0.06 | -3.23 ± 0.06 | -3.17 ± 0.06 | -3.10 ± 0.06 | -3.07 ± 0.06 | -3.11 ± 0.06 | -3.11 ± 0.06 | -3.17 ± 0.06 | -3.02 ± 0.06 | -3.14 ± 0.06 |
| Bacteria | <i>Candidatus Amoebophilus</i>              | -1.40 ± 0.04 | -1.59 ± 0.05 | -2.03 ± 0.06 | -2.41 ± 0.07 | -2.52 ± 0.07 | -2.56 ± 0.06 | -2.47 ± 0.06 | -2.42 ± 0.06 | -2.42 ± 0.06 | -2.29 ± 0.06 | -2.26 ± 0.06 | -2.25 ± 0.06 | -2.34 ± 0.06 |
| Bacteria | <i>Carboxydotherrnus hydrogenoformans</i>   | -2.38 ± 0.04 | -2.64 ± 0.05 | -3.09 ± 0.06 | -3.13 ± 0.06 | -3.12 ± 0.05 | -3.21 ± 0.05 | -3.25 ± 0.05 | -3.17 ± 0.05 | -3.35 ± 0.06 | -3.32 ± 0.06 | -3.31 ± 0.05 | -3.26 ± 0.06 | -3.25 ± 0.06 |
| Bacteria | <i>Caulobacter crescentus</i>               | -5.17 ± 0.05 | -5.97 ± 0.06 | -7.13 ± 0.06 | -7.69 ± 0.06 | -7.84 ± 0.06 | -7.84 ± 0.06 | -7.59 ± 0.06 | -7.52 ± 0.06 | -7.66 ± 0.06 | -7.60 ± 0.06 | -7.58 ± 0.06 | -7.66 ± 0.06 | -7.56 ± 0.06 |
| Bacteria | <i>Cellvibrio japonicus</i>                 | -2.77 ± 0.04 | -3.31 ± 0.05 | -4.20 ± 0.05 | -4.72 ± 0.06 | -5.00 ± 0.05 | -5.09 ± 0.05 | -5.00 ± 0.05 | -4.82 ± 0.05 | -4.85 ± 0.05 | -4.78 ± 0.05 | -4.76 ± 0.05 | -4.78 ± 0.05 | -4.90 ± 0.05 |
| Bacteria | <i>Chlamydia muridarum</i>                  | -2.07 ± 0.06 | -2.31 ± 0.07 | -2.80 ± 0.08 | -2.82 ± 0.08 | -3.03 ± 0.09 | -3.21 ± 0.09 | -3.12 ± 0.08 | -3.19 ± 0.09 | -3.17 ± 0.09 | -3.13 ± 0.08 | -3.12 ± 0.08 | -3.14 ± 0.08 | -3.03 ± 0.08 |
| Bacteria | <i>Chlamydomphila abortus</i>               | -1.98 ± 0.06 | -2.10 ± 0.07 | -2.74 ± 0.08 | -2.85 ± 0.08 | -2.94 ± 0.08 | -3.09 ± 0.08 | -2.99 ± 0.08 | -2.94 ± 0.08 | -2.96 ± 0.08 | -2.95 ± 0.08 | -2.87 ± 0.08 | -2.92 ± 0.08 | -2.99 ± 0.08 |
| Bacteria | <i>Chlorobaculum parvum</i>                 | -2.69 ± 0.05 | -3.59 ± 0.06 | -4.73 ± 0.07 | -5.28 ± 0.07 | -5.34 ± 0.07 | -5.39 ± 0.07 | -5.31 ± 0.07 | -5.38 ± 0.07 | -5.39 ± 0.07 | -5.37 ± 0.07 | -5.37 ± 0.07 | -5.31 ± 0.07 | -5.35 ± 0.07 |
| Bacteria | <i>Chlorobium chlorochromatii</i>           | -2.06 ± 0.04 | -2.48 ± 0.05 | -3.40 ± 0.06 | -3.99 ± 0.07 | -3.95 ± 0.06 | -3.78 ± 0.06 | -3.67 ± 0.06 | -3.70 ± 0.06 | -3.75 ± 0.06 | -3.76 ± 0.06 | -3.70 ± 0.06 | -3.78 ± 0.06 | -3.67 ± 0.06 |
| Bacteria | <i>Chloroflexus aggregans</i>               | -3.47 ± 0.04 | -3.90 ± 0.05 | -4.77 ± 0.05 | -5.23 ± 0.05 | -5.47 ± 0.05 | -5.54 ± 0.05 | -5.54 ± 0.05 | -5.39 ± 0.05 | -5.41 ± 0.05 | -5.45 ± 0.05 | -5.41 ± 0.05 | -5.39 ± 0.05 | -5.36 ± 0.05 |
| Bacteria | <i>Chloroherpeton thalassium</i>            | -2.06 ± 0.04 | -2.47 ± 0.04 | -3.34 ± 0.05 | -3.68 ± 0.05 | -3.75 ± 0.05 | -3.74 ± 0.05 | -3.57 ± 0.05 | -3.70 ± 0.05 | -3.80 ± 0.05 | -3.80 ± 0.05 | -3.66 ± 0.05 | -3.80 ± 0.05 | -3.82 ± 0.05 |
| Bacteria | <i>Chromobacterium violaceum</i>            | -4.17 ± 0.05 | -5.36 ± 0.05 | -6.77 ± 0.06 | -7.19 ± 0.06 | -7.25 ± 0.06 | -7.46 ± 0.06 | -7.33 ± 0.06 | -7.33 ± 0.06 | -7.35 ± 0.06 | -7.29 ± 0.06 | -7.34 ± 0.06 | -7.33 ± 0.06 | -7.29 ± 0.06 |
| Bacteria | <i>Chromohalobacter salzigens</i>           | -3.95 ± 0.05 | -5.11 ± 0.05 | -6.41 ± 0.06 | -6.79 ± 0.06 | -6.86 ± 0.06 | -7.01 ± 0.06 | -6.94 ± 0.06 | -6.95 ± 0.06 | -7.04 ± 0.06 | -7.00 ± 0.06 | -6.97 ± 0.06 | -7.02 ± 0.06 | -6.98 ± 0.06 |
| Bacteria | <i>Citrobacter koseri</i>                   | -3.17 ± 0.04 | -3.82 ± 0.04 | -4.76 ± 0.05 | -4.91 ± 0.05 | -5.03 ± 0.05 | -4.99 ± 0.05 | -4.88 ± 0.05 | -4.94 ± 0.05 | -5.05 ± 0.05 | -5.03 ± 0.05 | -5.01 ± 0.05 | -5.08 ± 0.05 | -5.11 ± 0.05 |
| Bacteria | <i>Clavibacter michiganensis</i>            | -5.16 ± 0.06 | -6.66 ± 0.07 | -8.05 ± 0.07 | -8.39 ± 0.07 | -8.53 ± 0.07 | -8.68 ± 0.07 | -8.61 ± 0.06 | -8.57 ± 0.06 | -8.70 ± 0.06 | -8.56 ± 0.06 | -8.53 ± 0.06 | -8.50 ± 0.06 | -8.37 ± 0.06 |
| Bacteria | <i>Clostridium acetobutylicum</i>           | -1.25 ± 0.03 | -1.52 ± 0.03 | -1.73 ± 0.03 | -1.93 ± 0.03 | -1.86 ± 0.03 | -1.91 ± 0.03 | -1.91 ± 0.03 | -1.86 ± 0.03 | -1.90 ± 0.03 | -1.97 ± 0.03 | -1.94 ± 0.03 | -1.93 ± 0.03 | -1.95 ± 0.03 |
| Bacteria | <i>Colwellia psychrerythraea</i>            | -1.51 ± 0.03 | -1.88 ± 0.03 | -2.57 ± 0.04 | -2.94 ± 0.04 | -3.01 ± 0.04 | -3.02 ± 0.04 | -3.02 ± 0.04 | -2.83 ± 0.04 | -2.90 ± 0.04 | -2.87 ± 0.04 | -2.89 ± 0.03 | -2.92 ± 0.03 | -2.89 ± 0.04 |
| Bacteria | <i>Coprothermobacter proteolyticus</i>      | -2.75 ± 0.06 | -2.98 ± 0.06 | -3.40 ± 0.07 | -3.56 ± 0.07 | -3.55 ± 0.07 | -3.57 ± 0.07 | -3.66 ± 0.07 | -3.57 ± 0.07 | -3.63 ± 0.07 | -3.54 ± 0.07 | -3.58 ± 0.07 | -3.53 ± 0.07 | -3.48 ± 0.06 |
| Bacteria | <i>Corynebacterium aurimucosum</i>          | -3.59 ± 0.05 | -4.35 ± 0.06 | -5.60 ± 0.07 | -5.78 ± 0.07 | -6.12 ± 0.07 | -6.07 ± 0.07 | -6.04 ± 0.07 | -6.13 ± 0.07 | -6.12 ± 0.06 | -6.15 ± 0.06 | -6.05 ± 0.06 | -6.16 ± 0.07 | -6.09 ± 0.06 |
| Bacteria | <i>Coziella burnetii</i>                    | -2.13 ± 0.05 | -2.36 ± 0.06 | -2.96 ± 0.07 | -3.19 ± 0.07 | -3.32 ± 0.07 | -3.48 ± 0.07 | -3.62 ± 0.07 | -3.43 ± 0.07 | -3.43 ± 0.07 | -3.32 ± 0.06 | -3.45 ± 0.07 | -3.46 ± 0.07 | -3.36 ± 0.07 |
| Bacteria | <i>Cronobacter sakazakii</i>                | -3.24 ± 0.04 | -4.19 ± 0.05 | -5.39 ± 0.06 | -5.63 ± 0.05 | -5.65 ± 0.05 | -5.67 ± 0.05 | -5.64 ± 0.05 | -5.63 ± 0.05 | -5.75 ± 0.05 | -5.75 ± 0.05 | -5.75 ± 0.05 | -5.82 ± 0.05 | -5.75 ± 0.05 |
| Bacteria | <i>Cupriavidus taiwanensis</i>              | -4.21 ± 0.04 | -5.57 ± 0.05 | -7.06 ± 0.05 | -7.66 ± 0.05 | -7.98 ± 0.05 | -8.15 ± 0.05 | -8.07 ± 0.05 | -8.13 ± 0.05 | -8.16 ± 0.05 | -8.05 ± 0.05 | -8.03 ± 0.05 | -8.09 ± 0.05 | -8.01 ± 0.05 |
| Bacteria | <i>Cyanothece sp. PCC 7424</i>              | -1.61 ± 0.02 | -1.76 ± 0.03 | -2.22 ± 0.03 | -2.60 ± 0.03 | -2.81 ± 0.03 | -2.90 ± 0.03 | -2.78 ± 0.03 | -2.70 ± 0.03 | -2.68 ± 0.03 | -2.67 ± 0.03 | -2.64 ± 0.03 | -2.65 ± 0.03 | -2.61 ± 0.03 |
| Bacteria | <i>Cytophaga hutchinsonii</i>               | -1.47 ± 0.03 | -1.71 ± 0.03 | -2.47 ± 0.04 | -2.99 ± 0.04 | -3.07 ± 0.04 | -2.97 ± 0.04 | -2.81 ± 0.04 | -2.77 ± 0.04 | -2.84 ± 0.04 | -2.82 ± 0.04 | -2.90 ± 0.04 | -2.91 ± 0.04 | -2.81 ± 0.04 |
| Bacteria | <i>Dechloromonas aromatica</i>              | -3.15 ± 0.04 | -4.09 ± 0.05 | -5.46 ± 0.05 | -6.12 ± 0.05 | -6.20 ± 0.05 | -6.23 ± 0.05 | -6.07 ± 0.05 | -6.03 ± 0.05 | -6.12 ± 0.05 | -6.10 ± 0.05 | -6.11 ± 0.05 | -6.14 ± 0.05 | -6.07 ± 0.05 |
| Bacteria | <i>Dehalococcoides ethenogenes</i>          | -2.54 ± 0.06 | -3.16 ± 0.07 | -4.62 ± 0.07 | -4.27 ± 0.08 | -4.62 ± 0.08 | -4.78 ± 0.08 | -4.62 ± 0.08 | -4.54 ± 0.08 | -4.60 ± 0.08 | -4.41 ± 0.07 | -4.56 ± 0.08 | -4.48 ± 0.08 | -4.47 ± 0.07 |
| Bacteria | <i>Deinococcus deserti</i>                  | -4.03 ± 0.06 | -4.78 ± 0.06 | -6.00 ± 0.07 | -6.58 ± 0.07 | -6.84 ± 0.07 | -6.93 ± 0.07 | -6.93 ± 0.06 | -6.71 ± 0.07 | -6.83 ± 0.06 | -6.72 ± 0.06 | -6.72 ± 0.06 | -6.82 ± 0.06 | -6.70 ± 0.06 |
| Bacteria | <i>Delftia acidovorans</i>                  | -3.64 ± 0.04 | -4.89 ± 0.04 | -6.54 ± 0.05 | -7.20 ± 0.05 | -7.43 ± 0.05 | -7.63 ± 0.05 | -7.54 ± 0.05 | -7.60 ± 0.05 | -7.70 ± 0.05 | -7.61 ± 0.05 | -7.60 ± 0.05 | -7.69 ± 0.05 | -7.63 ± 0.05 |

Continued on next page

| Type     | Species                                 | Window 1     | Window 2     | Window 3     | Window 4     | Window 5     | Window 6     | Window 7     | Window 8     | Window 9     | Window 10    | Window 11    | Window 12    | Window 13    |
|----------|-----------------------------------------|--------------|--------------|--------------|--------------|--------------|--------------|--------------|--------------|--------------|--------------|--------------|--------------|--------------|
| Bacteria | <i>Desulfatibacillum alkenivorans</i>   | -2.53 ± 0.03 | -3.31 ± 0.04 | -4.29 ± 0.04 | -4.91 ± 0.05 | -5.14 ± 0.05 | -5.33 ± 0.05 | -5.35 ± 0.05 | -5.32 ± 0.04 | -5.37 ± 0.04 | -5.22 ± 0.04 | -5.35 ± 0.04 | -5.37 ± 0.04 | -5.32 ± 0.04 |
| Bacteria | <i>Desulfotobacterium hafniense</i>     | -2.40 ± 0.03 | -2.97 ± 0.04 | -3.46 ± 0.04 | -3.70 ± 0.04 | -3.84 ± 0.04 | -3.99 ± 0.04 | -4.04 ± 0.04 | -4.05 ± 0.04 | -4.11 ± 0.04 | -4.22 ± 0.04 | -4.16 ± 0.04 | -4.20 ± 0.04 | -4.15 ± 0.04 |
| Bacteria | <i>Desulfobacterium autotrophicum</i>   | -2.28 ± 0.03 | -2.80 ± 0.04 | -3.50 ± 0.04 | -3.90 ± 0.04 | -4.00 ± 0.04 | -4.17 ± 0.04 | -4.19 ± 0.04 | -4.18 ± 0.04 | -4.21 ± 0.04 | -4.19 ± 0.04 | -4.22 ± 0.04 | -4.27 ± 0.04 | -4.21 ± 0.04 |
| Bacteria | <i>Desulfococcus oleovorans</i>         | -2.77 ± 0.04 | -3.58 ± 0.05 | -4.65 ± 0.06 | -5.34 ± 0.06 | -5.74 ± 0.06 | -5.84 ± 0.06 | -5.84 ± 0.06 | -5.77 ± 0.06 | -5.80 ± 0.06 | -5.69 ± 0.06 | -5.74 ± 0.06 | -5.72 ± 0.06 | -5.61 ± 0.06 |
| Bacteria | <i>Desulfotalea psychrophila</i>        | -2.16 ± 0.04 | -2.50 ± 0.04 | -3.06 ± 0.05 | -3.50 ± 0.05 | -3.58 ± 0.05 | -3.73 ± 0.05 | -3.81 ± 0.05 | -3.73 ± 0.05 | -3.75 ± 0.05 | -3.75 ± 0.05 | -3.77 ± 0.05 | -3.84 ± 0.05 | -3.89 ± 0.05 |
| Bacteria | <i>Desulfotomaculum reducens</i>        | -2.33 ± 0.04 | -2.67 ± 0.04 | -3.15 ± 0.05 | -3.20 ± 0.05 | -3.37 ± 0.05 | -3.42 ± 0.05 | -3.35 ± 0.05 | -3.31 ± 0.05 | -3.45 ± 0.05 | -3.44 ± 0.05 | -3.43 ± 0.05 | -3.41 ± 0.05 | -3.32 ± 0.05 |
| Bacteria | <i>Desulfovibrio desulfuricans</i>      | -3.24 ± 0.05 | -4.19 ± 0.06 | -5.47 ± 0.07 | -5.95 ± 0.07 | -6.11 ± 0.07 | -6.29 ± 0.07 | -6.11 ± 0.07 | -6.10 ± 0.07 | -6.11 ± 0.07 | -6.03 ± 0.07 | -5.93 ± 0.07 | -6.15 ± 0.07 | -5.94 ± 0.07 |
| Bacteria | <i>Diaphorobacter sp. TPSY</i>          | -3.43 ± 0.05 | -4.74 ± 0.06 | -6.79 ± 0.07 | -7.71 ± 0.07 | -7.87 ± 0.07 | -7.97 ± 0.06 | -7.85 ± 0.06 | -7.79 ± 0.06 | -7.92 ± 0.06 | -7.83 ± 0.06 | -7.87 ± 0.06 | -7.93 ± 0.06 | -7.73 ± 0.06 |
| Bacteria | <i>Dichelobacter nodosus</i>            | -2.20 ± 0.06 | -2.84 ± 0.07 | -3.62 ± 0.08 | -3.70 ± 0.08 | -3.82 ± 0.08 | -3.92 ± 0.08 | -3.85 ± 0.08 | -3.70 ± 0.08 | -3.80 ± 0.08 | -3.77 ± 0.08 | -3.75 ± 0.08 | -3.83 ± 0.07 | -3.75 ± 0.08 |
| Bacteria | <i>Dickeya dadantii</i>                 | -2.73 ± 0.03 | -3.81 ± 0.05 | -5.12 ± 0.05 | -5.40 ± 0.05 | -5.44 ± 0.05 | -5.42 ± 0.05 | -5.49 ± 0.05 | -5.36 ± 0.05 | -5.43 ± 0.05 | -5.49 ± 0.05 | -5.51 ± 0.05 | -5.54 ± 0.05 | -5.44 ± 0.05 |
| Bacteria | <i>Dictyoglomus thermophilum</i>        | -1.76 ± 0.04 | -1.74 ± 0.04 | -1.96 ± 0.05 | -2.10 ± 0.05 | -2.23 ± 0.05 | -2.36 ± 0.06 | -2.31 ± 0.05 | -2.36 ± 0.05 | -2.25 ± 0.05 | -2.36 ± 0.05 | -2.31 ± 0.05 | -2.34 ± 0.05 | -2.29 ± 0.05 |
| Bacteria | <i>Dinoroseobacter shibae</i>           | -4.05 ± 0.05 | -5.21 ± 0.06 | -6.74 ± 0.06 | -7.39 ± 0.06 | -7.47 ± 0.06 | -7.55 ± 0.06 | -7.37 ± 0.06 | -7.32 ± 0.06 | -7.38 ± 0.06 | -7.40 ± 0.06 | -7.36 ± 0.06 | -7.40 ± 0.06 | -7.32 ± 0.06 |
| Bacteria | <i>Eduardsiella ictaluri</i>            | -3.36 ± 0.05 | -4.28 ± 0.05 | -5.42 ± 0.06 | -5.69 ± 0.06 | -5.84 ± 0.06 | -5.96 ± 0.06 | -5.90 ± 0.06 | -5.85 ± 0.06 | -5.89 ± 0.06 | -5.85 ± 0.06 | -5.95 ± 0.06 | -6.00 ± 0.06 | -5.89 ± 0.06 |
| Bacteria | <i>Ehrlichia canis</i>                  | -1.48 ± 0.05 | -1.62 ± 0.06 | -2.00 ± 0.06 | -2.12 ± 0.07 | -2.09 ± 0.07 | -2.06 ± 0.07 | -1.99 ± 0.06 | -1.85 ± 0.06 | -1.87 ± 0.06 | -1.93 ± 0.06 | -1.88 ± 0.06 | -1.94 ± 0.06 | -1.94 ± 0.06 |
| Bacteria | <i>Elusimicrobium minutum</i>           | -1.31 ± 0.04 | -1.81 ± 0.05 | -2.69 ± 0.07 | -3.27 ± 0.07 | -3.59 ± 0.07 | -3.68 ± 0.08 | -3.40 ± 0.07 | -3.24 ± 0.07 | -3.27 ± 0.07 | -3.32 ± 0.07 | -3.33 ± 0.07 | -3.26 ± 0.07 | -3.14 ± 0.07 |
| Bacteria | <i>Enterobacter sp. 638</i>             | -2.76 ± 0.04 | -3.66 ± 0.04 | -4.86 ± 0.05 | -5.14 ± 0.05 | -5.16 ± 0.05 | -5.17 ± 0.05 | -5.07 ± 0.05 | -4.96 ± 0.05 | -5.04 ± 0.05 | -5.12 ± 0.05 | -5.05 ± 0.05 | -5.13 ± 0.05 | -5.12 ± 0.05 |
| Bacteria | <i>Enterococcus faecalis</i>            | -1.62 ± 0.03 | -2.00 ± 0.04 | -2.45 ± 0.04 | -2.59 ± 0.04 | -2.64 ± 0.04 | -2.73 ± 0.04 | -2.75 ± 0.04 | -2.61 ± 0.04 | -2.72 ± 0.04 | -2.73 ± 0.04 | -2.61 ± 0.04 | -2.61 ± 0.04 | -2.67 ± 0.04 |
| Bacteria | <i>Erwinia tasmaniensis</i>             | -2.76 ± 0.04 | -3.72 ± 0.05 | -4.84 ± 0.06 | -5.11 ± 0.06 | -5.21 ± 0.06 | -5.32 ± 0.06 | -5.25 ± 0.06 | -5.15 ± 0.06 | -5.21 ± 0.06 | -5.16 ± 0.06 | -5.23 ± 0.06 | -5.30 ± 0.06 | -5.15 ± 0.06 |
| Bacteria | <i>Erythrobacter litoralis</i>          | -4.18 ± 0.05 | -5.03 ± 0.06 | -6.42 ± 0.06 | -7.15 ± 0.06 | -7.24 ± 0.06 | -7.25 ± 0.06 | -7.04 ± 0.06 | -6.97 ± 0.06 | -6.95 ± 0.06 | -6.75 ± 0.06 | -6.79 ± 0.06 | -6.78 ± 0.06 | -6.77 ± 0.06 |
| Bacteria | <i>Escherichia coli</i>                 | -2.62 ± 0.03 | -3.55 ± 0.04 | -4.67 ± 0.05 | -4.88 ± 0.05 | -4.79 ± 0.05 | -4.82 ± 0.05 | -4.75 ± 0.05 | -4.67 ± 0.05 | -4.70 ± 0.05 | -4.73 ± 0.05 | -4.70 ± 0.05 | -4.76 ± 0.05 | -4.65 ± 0.05 |
| Bacteria | <i>Eubacterium eligens</i>              | -1.71 ± 0.04 | -2.12 ± 0.05 | -2.65 ± 0.06 | -2.75 ± 0.05 | -2.79 ± 0.06 | -2.87 ± 0.05 | -2.89 ± 0.06 | -2.84 ± 0.05 | -2.86 ± 0.05 | -2.94 ± 0.05 | -2.81 ± 0.05 | -2.83 ± 0.05 | -2.82 ± 0.05 |
| Bacteria | <i>Exiguobacterium sibiricum</i>        | -2.21 ± 0.04 | -2.89 ± 0.04 | -3.67 ± 0.05 | -3.83 ± 0.05 | -3.88 ± 0.05 | -3.85 ± 0.05 | -3.87 ± 0.05 | -3.91 ± 0.05 | -3.92 ± 0.05 | -4.02 ± 0.05 | -4.03 ± 0.05 | -4.07 ± 0.05 | -4.08 ± 0.05 |
| Bacteria | <i>Fervidobacterium nodosum</i>         | -1.74 ± 0.04 | -1.75 ± 0.04 | -2.01 ± 0.05 | -2.07 ± 0.05 | -2.04 ± 0.05 | -2.12 ± 0.05 | -2.06 ± 0.05 | -2.21 ± 0.05 | -2.32 ± 0.05 | -2.34 ± 0.05 | -2.33 ± 0.05 | -2.32 ± 0.05 | -2.32 ± 0.05 |
| Bacteria | <i>Finegoldia magna</i>                 | -1.17 ± 0.04 | -1.58 ± 0.05 | -2.05 ± 0.06 | -2.14 ± 0.05 | -2.07 ± 0.05 | -2.18 ± 0.05 | -2.20 ± 0.05 | -2.17 ± 0.05 | -2.16 ± 0.05 | -2.04 ± 0.05 | -2.14 ± 0.05 | -2.15 ± 0.05 | -2.07 ± 0.05 |
| Bacteria | <i>Flavobacterium johnsoniae</i>        | -1.03 ± 0.02 | -1.42 ± 0.02 | -2.15 ± 0.03 | -2.59 ± 0.03 | -2.61 ± 0.03 | -2.40 ± 0.03 | -2.34 ± 0.03 | -2.31 ± 0.03 | -2.35 ± 0.03 | -2.39 ± 0.03 | -2.38 ± 0.03 | -2.43 ± 0.03 | -2.42 ± 0.03 |
| Bacteria | <i>Francisella novicida</i>             | -1.22 ± 0.03 | -1.58 ± 0.04 | -2.22 ± 0.05 | -2.38 ± 0.05 | -2.49 ± 0.05 | -2.44 ± 0.05 | -2.45 ± 0.05 | -2.28 ± 0.05 | -2.31 ± 0.05 | -2.34 ± 0.05 | -2.23 ± 0.05 | -2.19 ± 0.05 | -2.19 ± 0.05 |
| Bacteria | <i>Frankia alni</i>                     | -7.27 ± 0.04 | -7.98 ± 0.05 | -8.49 ± 0.05 | -8.55 ± 0.05 | -8.61 ± 0.05 | -8.72 ± 0.05 | -8.61 ± 0.05 | -8.68 ± 0.05 | -8.74 ± 0.05 | -8.62 ± 0.05 | -8.59 ± 0.05 | -8.68 ± 0.04 | -8.61 ± 0.05 |
| Bacteria | <i>Fusobacterium nucleatum</i>          | -1.18 ± 0.03 | -1.34 ± 0.04 | -1.58 ± 0.04 | -1.65 ± 0.04 | -1.58 ± 0.04 | -1.62 ± 0.04 | -1.65 ± 0.04 | -1.66 ± 0.04 | -1.65 ± 0.04 | -1.70 ± 0.04 | -1.68 ± 0.04 | -1.68 ± 0.04 | -1.66 ± 0.04 |
| Bacteria | <i>Gemmatimonas aurantiaca</i>          | -5.00 ± 0.05 | -5.86 ± 0.05 | -6.95 ± 0.06 | -7.33 ± 0.06 | -7.34 ± 0.06 | -7.48 ± 0.06 | -7.34 ± 0.06 | -7.30 ± 0.06 | -7.34 ± 0.06 | -7.34 ± 0.06 | -7.22 ± 0.06 | -7.30 ± 0.06 | -7.25 ± 0.06 |
| Bacteria | <i>Geobacillus kaustophilus</i>         | -3.29 ± 0.04 | -3.85 ± 0.05 | -4.53 ± 0.06 | -4.60 ± 0.05 | -4.72 ± 0.06 | -4.82 ± 0.06 | -4.73 ± 0.05 | -4.75 ± 0.05 | -4.85 ± 0.05 | -4.83 ± 0.05 | -4.82 ± 0.05 | -4.91 ± 0.05 | -4.85 ± 0.05 |
| Bacteria | <i>Geobacter bemidjiensis</i>           | -3.01 ± 0.04 | -3.80 ± 0.04 | -4.80 ± 0.05 | -5.47 ± 0.05 | -5.84 ± 0.05 | -6.02 ± 0.05 | -6.00 ± 0.05 | -5.98 ± 0.05 | -6.02 ± 0.05 | -5.94 ± 0.05 | -5.94 ± 0.05 | -6.02 ± 0.05 | -6.00 ± 0.05 |
| Bacteria | <i>Gloeobacter violaceus</i>            | -4.17 ± 0.04 | -4.71 ± 0.04 | -5.64 ± 0.05 | -6.10 ± 0.05 | -6.41 ± 0.05 | -6.44 ± 0.05 | -6.39 ± 0.05 | -6.39 ± 0.05 | -6.46 ± 0.05 | -6.38 ± 0.05 | -6.29 ± 0.05 | -6.44 ± 0.05 | -6.34 ± 0.05 |
| Bacteria | <i>Gluconacetobacter diazotrophicus</i> | -4.53 ± 0.05 | -5.69 ± 0.06 | -7.11 ± 0.06 | -7.49 ± 0.06 | -7.81 ± 0.07 | -8.05 ± 0.06 | -7.93 ± 0.06 | -7.88 ± 0.06 | -7.86 ± 0.06 | -7.76 ± 0.06 | -7.80 ± 0.06 | -7.88 ± 0.06 | -7.72 ± 0.06 |
| Bacteria | <i>Gluconobacter oxydans</i>            | -3.90 ± 0.06 | -4.78 ± 0.06 | -5.91 ± 0.07 | -6.18 ± 0.07 | -6.42 ± 0.07 | -6.40 ± 0.07 | -6.37 ± 0.07 | -6.32 ± 0.07 | -6.42 ± 0.06 | -6.42 ± 0.06 | -6.31 ± 0.06 | -6.36 ± 0.06 | -6.46 ± 0.07 |
| Bacteria | <i>Gramella forsetii</i>                | -1.35 ± 0.03 | -1.70 ± 0.03 | -2.42 ± 0.04 | -2.85 ± 0.04 | -2.99 ± 0.04 | -2.82 ± 0.04 | -2.69 ± 0.04 | -2.64 ± 0.04 | -2.69 ± 0.04 | -2.82 ± 0.04 | -2.69 ± 0.04 | -2.71 ± 0.04 | -2.66 ± 0.04 |
| Bacteria | <i>Granulibacter betheddensis</i>       | -4.23 ± 0.06 | -4.75 ± 0.06 | -5.56 ± 0.07 | -6.00 ± 0.07 | -6.16 ± 0.07 | -6.28 ± 0.07 | -6.26 ± 0.07 | -6.21 ± 0.07 | -6.22 ± 0.07 | -6.21 ± 0.07 | -6.24 ± 0.07 | -6.29 ± 0.07 | -6.17 ± 0.07 |
| Bacteria | <i>Haemophilus ducreyi</i>              | -1.70 ± 0.05 | -2.14 ± 0.05 | -2.78 ± 0.06 | -2.94 ± 0.06 | -2.92 ± 0.06 | -2.93 ± 0.06 | -2.92 ± 0.06 | -2.87 ± 0.06 | -2.80 ± 0.06 | -2.91 ± 0.06 | -2.90 ± 0.06 | -2.86 ± 0.06 | -2.96 ± 0.06 |
| Bacteria | <i>Hahella chejuensis</i>               | -2.91 ± 0.03 | -3.55 ± 0.04 | -4.51 ± 0.04 | -4.90 ± 0.04 | -5.10 ± 0.04 | -5.19 ± 0.04 | -5.16 ± 0.04 | -5.10 ± 0.04 | -5.10 ± 0.04 | -5.07 ± 0.04 | -5.02 ± 0.04 | -5.09 ± 0.04 | -4.97 ± 0.04 |
| Bacteria | <i>Halorhodospira halophila</i>         | -4.88 ± 0.06 | -5.86 ± 0.07 | -7.19 ± 0.07 | -7.86 ± 0.08 | -8.21 ± 0.08 | -8.37 ± 0.08 | -8.11 ± 0.07 | -7.92 ± 0.07 | -8.02 ± 0.07 | -7.74 ± 0.07 | -7.92 ± 0.07 | -7.89 ± 0.07 | -7.78 ± 0.07 |

Continued on next page

| Type     | Species                                  | Window 1     | Window 2     | Window 3     | Window 4     | Window 5     | Window 6     | Window 7     | Window 8     | Window 9     | Window 10    | Window 11    | Window 12    | Window 13    |
|----------|------------------------------------------|--------------|--------------|--------------|--------------|--------------|--------------|--------------|--------------|--------------|--------------|--------------|--------------|--------------|
| Bacteria | <i>Halothermothrix orenii</i>            | -1.87 ± 0.04 | -2.15 ± 0.05 | -2.51 ± 0.05 | -2.57 ± 0.05 | -2.81 ± 0.06 | -2.82 ± 0.05 | -2.78 ± 0.05 | -2.79 ± 0.05 | -2.81 ± 0.05 | -2.95 ± 0.05 | -3.03 ± 0.06 | -2.99 ± 0.06 | -2.92 ± 0.05 |
| Bacteria | <i>Helicobacter acinonychis</i>          | -1.84 ± 0.05 | -2.04 ± 0.05 | -2.54 ± 0.06 | -2.81 ± 0.06 | -2.80 ± 0.06 | -2.78 ± 0.06 | -2.67 ± 0.06 | -2.67 ± 0.06 | -2.77 ± 0.06 | -2.72 ± 0.06 | -2.72 ± 0.06 | -2.66 ± 0.06 | -2.64 ± 0.06 |
| Bacteria | <i>Helibacterium modesticaldum</i>       | -3.93 ± 0.05 | -4.55 ± 0.06 | -5.12 ± 0.06 | -5.12 ± 0.06 | -5.41 ± 0.06 | -5.48 ± 0.06 | -5.46 ± 0.06 | -5.54 ± 0.06 | -5.61 ± 0.06 | -5.57 ± 0.06 | -5.53 ± 0.06 | -5.51 ± 0.06 | -5.40 ± 0.06 |
| Bacteria | <i>Herminiimonas arsenicozydans</i>      | -2.70 ± 0.04 | -3.51 ± 0.05 | -4.57 ± 0.06 | -5.17 ± 0.06 | -5.30 ± 0.06 | -5.52 ± 0.06 | -5.42 ± 0.05 | -5.36 ± 0.06 | -5.42 ± 0.05 | -5.43 ± 0.06 | -5.38 ± 0.06 | -5.42 ± 0.05 | -5.32 ± 0.05 |
| Bacteria | <i>Herpetosiphon aurantiacus</i>         | -3.06 ± 0.03 | -3.50 ± 0.04 | -4.23 ± 0.04 | -4.60 ± 0.04 | -4.72 ± 0.04 | -4.75 ± 0.04 | -4.72 ± 0.04 | -4.61 ± 0.04 | -4.62 ± 0.04 | -4.64 ± 0.04 | -4.61 ± 0.04 | -4.65 ± 0.04 | -4.66 ± 0.04 |
| Bacteria | <i>Hydrogenobaculum sp. Y04AAS1</i>      | -1.86 ± 0.04 | -2.05 ± 0.05 | -2.41 ± 0.06 | -2.57 ± 0.06 | -2.69 ± 0.06 | -2.61 ± 0.06 | -2.58 ± 0.06 | -2.40 ± 0.06 | -2.45 ± 0.05 | -2.42 ± 0.06 | -2.35 ± 0.06 | -2.31 ± 0.06 | -2.34 ± 0.05 |
| Bacteria | <i>Hyphomonas neptunium</i>              | -3.75 ± 0.05 | -4.68 ± 0.05 | -6.17 ± 0.06 | -6.84 ± 0.06 | -6.94 ± 0.06 | -6.93 ± 0.06 | -6.83 ± 0.06 | -6.71 ± 0.06 | -6.74 ± 0.06 | -6.63 ± 0.06 | -6.62 ± 0.06 | -6.68 ± 0.06 | -6.63 ± 0.06 |
| Bacteria | <i>Idiomarina loihiensis</i>             | -2.46 ± 0.04 | -3.00 ± 0.05 | -3.97 ± 0.06 | -4.48 ± 0.06 | -4.43 ± 0.06 | -4.32 ± 0.06 | -4.21 ± 0.05 | -4.09 ± 0.05 | -4.12 ± 0.05 | -4.21 ± 0.05 | -4.20 ± 0.05 | -4.13 ± 0.05 | -4.15 ± 0.05 |
| Bacteria | <i>Jannaschia sp. CCS1</i>               | -3.59 ± 0.04 | -4.55 ± 0.05 | -5.98 ± 0.05 | -6.66 ± 0.05 | -6.82 ± 0.05 | -6.80 ± 0.05 | -6.60 ± 0.05 | -6.46 ± 0.05 | -6.54 ± 0.05 | -6.47 ± 0.05 | -6.55 ± 0.05 | -6.56 ± 0.05 | -6.51 ± 0.05 |
| Bacteria | <i>Janthinobacterium sp. Marseille</i>   | -2.56 ± 0.04 | -3.46 ± 0.05 | -4.64 ± 0.05 | -5.33 ± 0.05 | -5.40 ± 0.05 | -5.50 ± 0.05 | -5.41 ± 0.05 | -5.39 ± 0.05 | -5.42 ± 0.05 | -5.31 ± 0.05 | -5.32 ± 0.05 | -5.45 ± 0.05 | -5.35 ± 0.05 |
| Bacteria | <i>Kineococcus radiotolerans</i>         | -6.38 ± 0.05 | -7.41 ± 0.06 | -8.55 ± 0.06 | -8.75 ± 0.06 | -8.95 ± 0.06 | -9.03 ± 0.06 | -9.01 ± 0.06 | -9.01 ± 0.06 | -9.15 ± 0.06 | -9.00 ± 0.06 | -9.07 ± 0.06 | -8.96 ± 0.06 | -8.85 ± 0.06 |
| Bacteria | <i>Klebsiella pneumoniae</i>             | -2.81 ± 0.03 | -4.01 ± 0.04 | -5.38 ± 0.05 | -5.72 ± 0.05 | -5.83 ± 0.05 | -5.89 ± 0.05 | -5.80 ± 0.05 | -5.73 ± 0.05 | -5.79 ± 0.05 | -5.85 ± 0.05 | -5.77 ± 0.05 | -5.92 ± 0.05 | -5.81 ± 0.05 |
| Bacteria | <i>Kocuria rhizophila</i>                | -5.16 ± 0.07 | -6.17 ± 0.07 | -7.59 ± 0.08 | -8.07 ± 0.08 | -8.41 ± 0.07 | -8.56 ± 0.07 | -8.31 ± 0.07 | -8.37 ± 0.07 | -8.41 ± 0.07 | -8.36 ± 0.07 | -8.37 ± 0.07 | -8.45 ± 0.07 | -8.38 ± 0.07 |
| Bacteria | <i>Kosmotoga olearia</i>                 | -2.31 ± 0.04 | -2.44 ± 0.05 | -2.66 ± 0.05 | -2.83 ± 0.05 | -2.93 ± 0.05 | -2.99 ± 0.05 | -3.06 ± 0.05 | -3.11 ± 0.06 | -3.22 ± 0.06 | -3.24 ± 0.05 | -3.15 ± 0.05 | -3.21 ± 0.06 | -3.06 ± 0.05 |
| Bacteria | <i>Lactobacillus acidophilus</i>         | -1.52 ± 0.04 | -1.91 ± 0.05 | -2.55 ± 0.06 | -2.53 ± 0.06 | -2.58 ± 0.05 | -2.59 ± 0.05 | -2.55 ± 0.05 | -2.44 ± 0.05 | -2.45 ± 0.05 | -2.47 ± 0.05 | -2.52 ± 0.05 | -2.45 ± 0.05 | -2.49 ± 0.05 |
| Bacteria | <i>Lactococcus lactis</i>                | -1.37 ± 0.03 | -1.90 ± 0.04 | -2.59 ± 0.05 | -2.67 ± 0.05 | -2.53 ± 0.05 | -2.62 ± 0.05 | -2.60 ± 0.05 | -2.50 ± 0.04 | -2.62 ± 0.05 | -2.56 ± 0.05 | -2.57 ± 0.05 | -2.56 ± 0.04 | -2.64 ± 0.05 |
| Bacteria | <i>Laribacter hongkongensis</i>          | -3.61 ± 0.05 | -4.86 ± 0.06 | -6.44 ± 0.07 | -6.73 ± 0.07 | -6.85 ± 0.07 | -6.93 ± 0.06 | -6.89 ± 0.07 | -6.80 ± 0.06 | -6.93 ± 0.06 | -6.74 ± 0.06 | -6.73 ± 0.06 | -6.94 ± 0.06 | -6.77 ± 0.06 |
| Bacteria | <i>Lawsonia intracellularis</i>          | -1.78 ± 0.05 | -1.78 ± 0.05 | -2.21 ± 0.06 | -2.43 ± 0.07 | -2.36 ± 0.06 | -2.30 ± 0.06 | -2.25 ± 0.06 | -2.10 ± 0.06 | -2.26 ± 0.06 | -2.31 ± 0.06 | -2.24 ± 0.06 | -2.32 ± 0.06 | -2.38 ± 0.06 |
| Bacteria | <i>Legionella pneumophila</i>            | -1.75 ± 0.03 | -1.99 ± 0.04 | -2.46 ± 0.04 | -2.73 ± 0.04 | -2.84 ± 0.04 | -2.83 ± 0.04 | -2.80 ± 0.04 | -2.72 ± 0.04 | -2.74 ± 0.04 | -2.76 ± 0.04 | -2.75 ± 0.04 | -2.79 ± 0.04 | -2.79 ± 0.04 |
| Bacteria | <i>Leifsonia zyli</i>                    | -5.53 ± 0.07 | -6.40 ± 0.08 | -7.39 ± 0.08 | -7.42 ± 0.08 | -7.63 ± 0.08 | -7.56 ± 0.08 | -7.61 ± 0.08 | -7.51 ± 0.08 | -7.56 ± 0.08 | -7.52 ± 0.08 | -7.65 ± 0.08 | -7.72 ± 0.08 | -7.52 ± 0.08 |
| Bacteria | <i>Leptospira biflexa</i>                | -1.66 ± 0.03 | -1.76 ± 0.03 | -2.25 ± 0.04 | -2.78 ± 0.04 | -3.03 ± 0.05 | -2.98 ± 0.04 | -2.83 ± 0.04 | -2.80 ± 0.04 | -2.78 ± 0.04 | -2.83 ± 0.04 | -2.85 ± 0.04 | -2.85 ± 0.04 | -2.94 ± 0.04 |
| Bacteria | <i>Leptothrix cholodnii</i>              | -3.85 ± 0.05 | -5.26 ± 0.05 | -7.16 ± 0.06 | -7.85 ± 0.06 | -8.13 ± 0.06 | -8.26 ± 0.06 | -8.23 ± 0.05 | -8.30 ± 0.05 | -8.36 ± 0.05 | -8.25 ± 0.05 | -8.20 ± 0.05 | -8.33 ± 0.05 | -8.18 ± 0.05 |
| Bacteria | <i>Leuconostoc citreum</i>               | -1.68 ± 0.04 | -2.04 ± 0.05 | -2.84 ± 0.06 | -3.00 ± 0.06 | -2.92 ± 0.06 | -3.00 ± 0.06 | -3.00 ± 0.06 | -2.92 ± 0.06 | -2.93 ± 0.06 | -3.13 ± 0.06 | -3.02 ± 0.06 | -3.13 ± 0.06 | -3.00 ± 0.06 |
| Bacteria | <i>Listeria innocua</i>                  | -1.50 ± 0.03 | -1.82 ± 0.03 | -2.26 ± 0.04 | -2.42 ± 0.04 | -2.41 ± 0.04 | -2.45 ± 0.04 | -2.44 ± 0.04 | -2.40 ± 0.04 | -2.46 ± 0.04 | -2.47 ± 0.04 | -2.45 ± 0.04 | -2.37 ± 0.04 | -2.48 ± 0.04 |
| Bacteria | <i>Lysinibacillus sphaericus</i>         | -1.91 ± 0.03 | -2.01 ± 0.03 | -2.32 ± 0.03 | -2.48 ± 0.03 | -2.55 ± 0.03 | -2.59 ± 0.03 | -2.64 ± 0.03 | -2.55 ± 0.03 | -2.61 ± 0.03 | -2.64 ± 0.03 | -2.58 ± 0.03 | -2.65 ± 0.03 | -2.65 ± 0.03 |
| Bacteria | <i>Macrocooccus caseolyticus</i>         | -1.52 ± 0.04 | -1.75 ± 0.04 | -2.23 ± 0.05 | -2.43 ± 0.05 | -2.42 ± 0.05 | -2.44 ± 0.05 | -2.50 ± 0.05 | -2.41 ± 0.05 | -2.57 ± 0.05 | -2.55 ± 0.05 | -2.58 ± 0.05 | -2.61 ± 0.05 | -2.58 ± 0.05 |
| Bacteria | <i>Magnetococcus sp. MC-1</i>            | -3.14 ± 0.04 | -3.71 ± 0.05 | -4.58 ± 0.05 | -5.15 ± 0.05 | -5.37 ± 0.05 | -5.36 ± 0.05 | -5.26 ± 0.05 | -5.26 ± 0.05 | -5.27 ± 0.05 | -5.23 ± 0.05 | -5.15 ± 0.05 | -5.27 ± 0.05 | -5.31 ± 0.05 |
| Bacteria | <i>Magnetospirillum magneticum</i>       | -4.77 ± 0.05 | -5.46 ± 0.05 | -6.58 ± 0.05 | -7.08 ± 0.05 | -7.37 ± 0.06 | -7.39 ± 0.06 | -7.32 ± 0.05 | -7.23 ± 0.05 | -7.40 ± 0.05 | -7.29 ± 0.05 | -7.40 ± 0.05 | -7.44 ± 0.05 | -7.28 ± 0.05 |
| Bacteria | <i>Mannheimia succiniciproducens</i>     | -1.77 ± 0.04 | -2.28 ± 0.05 | -3.09 ± 0.06 | -3.34 ± 0.06 | -3.51 ± 0.06 | -3.53 ± 0.06 | -3.50 ± 0.06 | -3.43 ± 0.06 | -3.43 ± 0.06 | -3.54 ± 0.06 | -3.55 ± 0.06 | -3.60 ± 0.06 | -3.57 ± 0.06 |
| Bacteria | <i>Maricaulis maris</i>                  | -3.78 ± 0.05 | -4.72 ± 0.06 | -6.21 ± 0.06 | -6.76 ± 0.06 | -7.02 ± 0.06 | -7.06 ± 0.06 | -6.90 ± 0.06 | -6.87 ± 0.06 | -6.94 ± 0.06 | -6.85 ± 0.06 | -6.86 ± 0.06 | -6.84 ± 0.06 | -6.77 ± 0.06 |
| Bacteria | <i>Marinobacter aquaeolei</i>            | -3.28 ± 0.04 | -4.04 ± 0.05 | -5.17 ± 0.05 | -5.66 ± 0.05 | -5.82 ± 0.05 | -5.89 ± 0.05 | -5.87 ± 0.05 | -5.81 ± 0.05 | -5.75 ± 0.05 | -5.75 ± 0.05 | -5.79 ± 0.05 | -5.71 ± 0.05 | -5.74 ± 0.05 |
| Bacteria | <i>Marinomonas sp. MWYL1</i>             | -1.94 ± 0.03 | -2.42 ± 0.03 | -3.21 ± 0.04 | -3.62 ± 0.04 | -3.59 ± 0.04 | -3.65 ± 0.04 | -3.52 ± 0.04 | -3.48 ± 0.04 | -3.43 ± 0.04 | -3.46 ± 0.04 | -3.43 ± 0.04 | -3.50 ± 0.04 | -3.49 ± 0.04 |
| Bacteria | <i>Mesoplasma florum</i>                 | -0.93 ± 0.11 | -1.29 ± 0.13 | -1.97 ± 0.18 | -1.92 ± 0.18 | -1.91 ± 0.20 | -1.83 ± 0.18 | -1.86 ± 0.19 | -1.89 ± 0.19 | -2.07 ± 0.18 | -1.95 ± 0.18 | -1.94 ± 0.18 | -2.05 ± 0.17 | -2.00 ± 0.18 |
| Bacteria | <i>Mesorhizobium loti</i>                | -4.54 ± 0.04 | -5.15 ± 0.04 | -6.26 ± 0.04 | -6.77 ± 0.04 | -6.92 ± 0.04 | -7.03 ± 0.04 | -6.92 ± 0.04 | -6.87 ± 0.04 | -6.86 ± 0.04 | -6.79 ± 0.04 | -6.83 ± 0.04 | -6.79 ± 0.04 | -6.75 ± 0.04 |
| Bacteria | <i>Methylacidiphilum infernorum</i>      | -2.51 ± 0.05 | -2.65 ± 0.05 | -3.01 ± 0.06 | -3.21 ± 0.06 | -3.36 ± 0.06 | -3.44 ± 0.06 | -3.42 ± 0.06 | -3.52 ± 0.06 | -3.47 ± 0.06 | -3.53 ± 0.06 | -3.53 ± 0.06 | -3.54 ± 0.06 | -3.51 ± 0.06 |
| Bacteria | <i>Methylithium petroleiphilum</i>       | -4.61 ± 0.05 | -5.82 ± 0.06 | -7.48 ± 0.06 | -8.09 ± 0.06 | -8.38 ± 0.06 | -8.44 ± 0.06 | -8.43 ± 0.06 | -8.44 ± 0.06 | -8.45 ± 0.06 | -8.30 ± 0.06 | -8.16 ± 0.06 | -8.31 ± 0.06 | -8.14 ± 0.06 |
| Bacteria | <i>Methylobacillus flagellatus</i>       | -2.97 ± 0.05 | -3.77 ± 0.05 | -4.90 ± 0.06 | -5.39 ± 0.06 | -5.62 ± 0.06 | -5.62 ± 0.06 | -5.50 ± 0.06 | -5.51 ± 0.06 | -5.51 ± 0.06 | -5.39 ± 0.06 | -5.46 ± 0.06 | -5.36 ± 0.06 | -5.32 ± 0.06 |
| Bacteria | <i>Methylobacterium chloromethanicum</i> | -4.92 ± 0.04 | -5.94 ± 0.05 | -7.39 ± 0.05 | -7.93 ± 0.05 | -8.15 ± 0.05 | -8.27 ± 0.05 | -8.12 ± 0.05 | -8.11 ± 0.05 | -8.10 ± 0.05 | -7.95 ± 0.05 | -7.90 ± 0.05 | -7.99 ± 0.05 | -7.83 ± 0.05 |
| Bacteria | <i>Methylocella silvestris</i>           | -4.33 ± 0.05 | -5.32 ± 0.05 | -6.62 ± 0.06 | -7.14 ± 0.06 | -7.28 ± 0.06 | -7.42 ± 0.06 | -7.40 ± 0.06 | -7.19 ± 0.06 | -7.06 ± 0.06 | -6.96 ± 0.06 | -6.95 ± 0.06 | -7.04 ± 0.06 | -6.97 ± 0.06 |

Continued on next page

| Type     | Species                                | Window 1     | Window 2     | Window 3     | Window 4     | Window 5     | Window 6     | Window 7     | Window 8     | Window 9     | Window 10    | Window 11    | Window 12    | Window 13    |
|----------|----------------------------------------|--------------|--------------|--------------|--------------|--------------|--------------|--------------|--------------|--------------|--------------|--------------|--------------|--------------|
| Bacteria | <i>Methylococcus capsulatus</i>        | -4.20 ± 0.05 | -5.09 ± 0.06 | -6.30 ± 0.07 | -6.68 ± 0.06 | -6.80 ± 0.07 | -6.97 ± 0.07 | -6.82 ± 0.06 | -6.78 ± 0.06 | -6.82 ± 0.06 | -6.78 ± 0.06 | -6.76 ± 0.06 | -6.80 ± 0.06 | -6.80 ± 0.06 |
| Bacteria | <i>Micrococcus luteus</i>              | -4.89 ± 0.07 | -6.28 ± 0.08 | -7.98 ± 0.08 | -8.46 ± 0.08 | -8.83 ± 0.08 | -8.95 ± 0.08 | -8.75 ± 0.08 | -8.74 ± 0.08 | -8.84 ± 0.08 | -8.82 ± 0.08 | -8.82 ± 0.08 | -8.89 ± 0.08 | -8.65 ± 0.07 |
| Bacteria | <i>Microcystis aeruginosa</i>          | -2.18 ± 0.03 | -2.31 ± 0.03 | -2.67 ± 0.03 | -3.07 ± 0.03 | -3.29 ± 0.03 | -3.29 ± 0.03 | -3.16 ± 0.03 | -3.11 ± 0.03 | -3.06 ± 0.03 | -3.10 ± 0.03 | -3.01 ± 0.03 | -3.03 ± 0.03 | -3.07 ± 0.03 |
| Bacteria | <i>Moorella thermoacetica</i>          | -3.89 ± 0.05 | -4.47 ± 0.06 | -5.30 ± 0.07 | -5.52 ± 0.07 | -5.69 ± 0.07 | -5.82 ± 0.07 | -5.72 ± 0.07 | -5.66 ± 0.07 | -5.84 ± 0.07 | -5.77 ± 0.07 | -5.75 ± 0.07 | -5.67 ± 0.07 | -5.67 ± 0.07 |
| Bacteria | <i>Mycobacterium avium</i>             | -6.06 ± 0.05 | -6.98 ± 0.05 | -7.87 ± 0.05 | -8.06 ± 0.05 | -8.18 ± 0.05 | -8.25 ± 0.05 | -8.14 ± 0.05 | -8.09 ± 0.05 | -8.21 ± 0.05 | -8.02 ± 0.05 | -8.01 ± 0.05 | -8.06 ± 0.05 | -7.95 ± 0.05 |
| Bacteria | <i>Mycoplasma agalactiae</i>           | -1.18 ± 0.12 | -1.24 ± 0.13 | -1.97 ± 0.16 | -2.19 ± 0.17 | -2.00 ± 0.17 | -2.14 ± 0.17 | -2.28 ± 0.18 | -2.10 ± 0.19 | -2.17 ± 0.17 | -2.37 ± 0.19 | -2.29 ± 0.20 | -2.29 ± 0.19 | -1.97 ± 0.17 |
| Bacteria | <i>Myzococcus xanthus</i>              | -5.51 ± 0.04 | -5.95 ± 0.04 | -6.76 ± 0.04 | -7.30 ± 0.04 | -7.60 ± 0.04 | -7.70 ± 0.04 | -7.56 ± 0.04 | -7.62 ± 0.04 | -7.77 ± 0.04 | -7.77 ± 0.04 | -7.78 ± 0.04 | -7.87 ± 0.04 | -7.76 ± 0.04 |
| Bacteria | <i>Natranaerobius thermophilus</i>     | -1.83 ± 0.03 | -1.90 ± 0.04 | -2.15 ± 0.04 | -2.29 ± 0.04 | -2.39 ± 0.04 | -2.52 ± 0.04 | -2.60 ± 0.04 | -2.44 ± 0.04 | -2.45 ± 0.04 | -2.56 ± 0.04 | -2.51 ± 0.04 | -2.53 ± 0.04 | -2.47 ± 0.04 |
| Bacteria | <i>Nautilia profundicola</i>           | -1.41 ± 0.04 | -1.65 ± 0.05 | -2.16 ± 0.06 | -2.34 ± 0.06 | -2.21 ± 0.06 | -2.20 ± 0.06 | -2.16 ± 0.05 | -2.15 ± 0.05 | -2.12 ± 0.05 | -2.19 ± 0.05 | -2.07 ± 0.05 | -2.08 ± 0.05 | -2.11 ± 0.05 |
| Bacteria | <i>Neisseria gonorrhoeae</i>           | -2.52 ± 0.06 | -3.17 ± 0.06 | -4.17 ± 0.07 | -4.64 ± 0.07 | -4.84 ± 0.08 | -4.87 ± 0.08 | -4.77 ± 0.07 | -4.82 ± 0.08 | -4.84 ± 0.07 | -4.77 ± 0.07 | -4.82 ± 0.08 | -4.82 ± 0.07 | -4.84 ± 0.07 |
| Bacteria | <i>Neorickettsia sennetsu</i>          | -2.36 ± 0.07 | -2.65 ± 0.08 | -3.06 ± 0.08 | -3.29 ± 0.09 | -3.40 ± 0.09 | -3.38 ± 0.09 | -3.35 ± 0.09 | -3.24 ± 0.08 | -3.15 ± 0.08 | -3.16 ± 0.08 | -3.25 ± 0.08 | -3.23 ± 0.08 | -3.26 ± 0.08 |
| Bacteria | <i>Nitratiruptor sp. SB155-2</i>       | -1.99 ± 0.04 | -2.27 ± 0.05 | -2.77 ± 0.06 | -2.91 ± 0.06 | -2.88 ± 0.06 | -2.94 ± 0.06 | -2.80 ± 0.06 | -2.71 ± 0.05 | -2.79 ± 0.06 | -2.72 ± 0.05 | -2.81 ± 0.05 | -2.82 ± 0.06 | -2.75 ± 0.05 |
| Bacteria | <i>Nitrobacter hamburgensis</i>        | -4.33 ± 0.05 | -4.93 ± 0.05 | -5.94 ± 0.05 | -6.51 ± 0.06 | -6.81 ± 0.06 | -6.96 ± 0.06 | -6.82 ± 0.05 | -6.67 ± 0.05 | -6.68 ± 0.05 | -6.73 ± 0.05 | -6.64 ± 0.05 | -6.75 ± 0.05 | -6.67 ± 0.05 |
| Bacteria | <i>Nitrosococcus oceanii</i>           | -2.77 ± 0.04 | -3.24 ± 0.05 | -4.05 ± 0.06 | -4.45 ± 0.06 | -4.59 ± 0.05 | -4.74 ± 0.06 | -4.66 ± 0.06 | -4.68 ± 0.06 | -4.55 ± 0.05 | -4.55 ± 0.05 | -4.58 ± 0.06 | -4.52 ± 0.05 | -4.54 ± 0.05 |
| Bacteria | <i>Nitrosomonas europaea</i>           | -2.75 ± 0.04 | -3.32 ± 0.05 | -4.24 ± 0.06 | -4.58 ± 0.06 | -4.71 ± 0.06 | -4.68 ± 0.06 | -4.65 ± 0.06 | -4.57 ± 0.06 | -4.64 ± 0.06 | -4.55 ± 0.06 | -4.67 ± 0.06 | -4.65 ± 0.06 | -4.64 ± 0.06 |
| Bacteria | <i>Nitrospira multiformis</i>          | -3.03 ± 0.05 | -3.64 ± 0.05 | -4.42 ± 0.06 | -4.81 ± 0.06 | -5.04 ± 0.06 | -5.07 ± 0.06 | -5.08 ± 0.06 | -4.96 ± 0.06 | -5.04 ± 0.06 | -5.04 ± 0.06 | -5.10 ± 0.06 | -5.10 ± 0.06 | -4.97 ± 0.06 |
| Bacteria | <i>Nocardia farcinica</i>              | -5.78 ± 0.04 | -6.91 ± 0.05 | -7.90 ± 0.05 | -8.17 ± 0.05 | -8.35 ± 0.05 | -8.44 ± 0.05 | -8.38 ± 0.05 | -8.35 ± 0.05 | -8.43 ± 0.05 | -8.28 ± 0.05 | -8.32 ± 0.05 | -8.31 ± 0.05 | -8.23 ± 0.05 |
| Bacteria | <i>Nocardioidea sp. JS614</i>          | -6.06 ± 0.05 | -7.48 ± 0.05 | -8.39 ± 0.05 | -8.62 ± 0.05 | -8.74 ± 0.05 | -8.85 ± 0.05 | -8.69 ± 0.05 | -8.75 ± 0.05 | -8.79 ± 0.05 | -8.78 ± 0.05 | -8.76 ± 0.05 | -8.75 ± 0.05 | -8.65 ± 0.05 |
| Bacteria | <i>Nostoc punctiforme</i>              | -2.05 ± 0.03 | -2.27 ± 0.03 | -2.78 ± 0.03 | -3.17 ± 0.03 | -3.27 ± 0.03 | -3.35 ± 0.03 | -3.27 ± 0.03 | -3.22 ± 0.03 | -3.25 ± 0.03 | -3.35 ± 0.03 | -3.20 ± 0.03 | -3.18 ± 0.03 | -3.27 ± 0.03 |
| Bacteria | <i>Novosphingobium aromaticivorans</i> | -4.43 ± 0.05 | -5.41 ± 0.06 | -6.78 ± 0.06 | -7.29 ± 0.06 | -7.38 ± 0.06 | -7.50 ± 0.06 | -7.29 ± 0.06 | -7.32 ± 0.06 | -7.18 ± 0.06 | -7.22 ± 0.06 | -7.18 ± 0.06 | -7.22 ± 0.06 | -7.08 ± 0.06 |
| Bacteria | <i>Oceanobacillus ihayensis</i>        | -1.64 ± 0.03 | -1.79 ± 0.03 | -2.12 ± 0.04 | -2.22 ± 0.04 | -2.24 ± 0.04 | -2.26 ± 0.04 | -2.30 ± 0.04 | -2.25 ± 0.03 | -2.33 ± 0.04 | -2.44 ± 0.04 | -2.37 ± 0.04 | -2.36 ± 0.04 | -2.40 ± 0.04 |
| Bacteria | <i>Ochrobactrum anthropi</i>           | -3.33 ± 0.04 | -4.02 ± 0.04 | -5.14 ± 0.05 | -5.70 ± 0.05 | -5.85 ± 0.05 | -5.90 ± 0.05 | -5.75 ± 0.05 | -5.83 ± 0.05 | -5.72 ± 0.05 | -5.64 ± 0.05 | -5.62 ± 0.05 | -5.71 ± 0.05 | -5.79 ± 0.05 |
| Bacteria | <i>Oenococcus oeni</i>                 | -1.65 ± 0.05 | -1.90 ± 0.05 | -2.46 ± 0.06 | -2.77 ± 0.06 | -2.87 ± 0.06 | -2.83 ± 0.06 | -2.78 ± 0.06 | -2.84 ± 0.06 | -2.87 ± 0.06 | -2.96 ± 0.06 | -2.99 ± 0.06 | -2.96 ± 0.06 | -2.94 ± 0.06 |
| Bacteria | <i>Oligotropha carboxidovorans</i>     | -4.24 ± 0.05 | -4.95 ± 0.05 | -6.08 ± 0.06 | -6.79 ± 0.06 | -7.05 ± 0.06 | -7.06 ± 0.06 | -6.96 ± 0.06 | -6.83 ± 0.06 | -6.80 ± 0.06 | -6.87 ± 0.06 | -6.77 ± 0.06 | -6.89 ± 0.06 | -6.75 ± 0.05 |
| Bacteria | <i>Onion yellows</i>                   | -1.07 ± 0.05 | -1.27 ± 0.06 | -1.46 ± 0.07 | -1.43 ± 0.07 | -1.43 ± 0.07 | -1.37 ± 0.06 | -1.44 ± 0.07 | -1.35 ± 0.07 | -1.41 ± 0.07 | -1.51 ± 0.06 | -1.60 ± 0.07 | -1.52 ± 0.07 | -1.53 ± 0.07 |
| Bacteria | <i>Opiritatus terrae</i>               | -3.55 ± 0.04 | -4.57 ± 0.05 | -6.09 ± 0.05 | -7.11 ± 0.05 | -7.38 ± 0.05 | -7.42 ± 0.05 | -7.31 ± 0.05 | -7.34 ± 0.05 | -7.35 ± 0.05 | -7.22 ± 0.05 | -7.20 ± 0.05 | -7.17 ± 0.05 | -7.01 ± 0.05 |
| Bacteria | <i>Orientia tsutsugamushi</i>          | -1.70 ± 0.05 | -1.77 ± 0.06 | -2.04 ± 0.06 | -2.07 ± 0.06 | -2.07 ± 0.06 | -2.13 ± 0.06 | -2.06 ± 0.06 | -1.98 ± 0.06 | -1.97 ± 0.06 | -2.08 ± 0.06 | -2.05 ± 0.06 | -2.23 ± 0.06 | -2.30 ± 0.06 |
| Bacteria | <i>Parabacteroides distasonis</i>      | -1.55 ± 0.03 | -2.36 ± 0.04 | -3.69 ± 0.05 | -4.30 ± 0.05 | -4.11 ± 0.05 | -3.92 ± 0.05 | -3.77 ± 0.04 | -3.77 ± 0.04 | -3.86 ± 0.04 | -3.80 ± 0.04 | -3.82 ± 0.04 | -3.86 ± 0.04 | -3.82 ± 0.04 |
| Bacteria | <i>Paracoccus denitrificans</i>        | -4.41 ± 0.04 | -5.57 ± 0.05 | -6.95 ± 0.05 | -7.62 ± 0.06 | -7.72 ± 0.05 | -7.78 ± 0.05 | -7.73 ± 0.05 | -7.64 ± 0.05 | -7.69 ± 0.05 | -7.71 ± 0.05 | -7.70 ± 0.05 | -7.78 ± 0.05 | -7.66 ± 0.05 |
| Bacteria | <i>Parvibaculum lavamentivorans</i>    | -4.08 ± 0.05 | -4.95 ± 0.05 | -6.24 ± 0.06 | -6.87 ± 0.06 | -7.09 ± 0.06 | -7.04 ± 0.06 | -6.88 ± 0.06 | -6.89 ± 0.06 | -6.88 ± 0.06 | -6.79 ± 0.06 | -6.76 ± 0.06 | -6.77 ± 0.06 | -6.67 ± 0.06 |
| Bacteria | <i>Pasteurella multocida</i>           | -1.60 ± 0.04 | -2.08 ± 0.05 | -2.87 ± 0.06 | -3.20 ± 0.06 | -3.26 ± 0.06 | -3.12 ± 0.06 | -3.08 ± 0.05 | -2.98 ± 0.05 | -3.04 ± 0.05 | -3.08 ± 0.05 | -2.99 ± 0.05 | -3.12 ± 0.05 | -3.04 ± 0.05 |
| Bacteria | <i>Pectobacterium atrosepticum</i>     | -2.59 ± 0.03 | -3.35 ± 0.04 | -4.36 ± 0.05 | -4.68 ± 0.05 | -4.75 ± 0.05 | -4.72 ± 0.04 | -4.71 ± 0.05 | -4.62 ± 0.04 | -4.66 ± 0.04 | -4.70 ± 0.04 | -4.66 ± 0.04 | -4.66 ± 0.04 | -4.69 ± 0.04 |
| Bacteria | <i>Pediococcus pentosaceus</i>         | -1.55 ± 0.04 | -1.93 ± 0.05 | -2.61 ± 0.06 | -2.66 ± 0.06 | -2.69 ± 0.06 | -2.82 ± 0.06 | -2.82 ± 0.05 | -2.68 ± 0.05 | -2.66 ± 0.05 | -2.80 ± 0.05 | -2.77 ± 0.06 | -2.74 ± 0.06 | -2.69 ± 0.05 |
| Bacteria | <i>Pelobacter carbinolicus</i>         | -2.95 ± 0.04 | -3.63 ± 0.05 | -4.50 ± 0.05 | -4.99 ± 0.06 | -5.27 ± 0.06 | -5.40 ± 0.06 | -5.29 ± 0.05 | -5.20 ± 0.05 | -5.34 ± 0.06 | -5.31 ± 0.05 | -5.34 ± 0.06 | -5.37 ± 0.05 | -5.33 ± 0.05 |
| Bacteria | <i>Pelodictyon luteolum</i>            | -2.96 ± 0.05 | -3.80 ± 0.06 | -4.97 ± 0.07 | -5.44 ± 0.07 | -5.40 ± 0.07 | -5.40 ± 0.07 | -5.52 ± 0.07 | -5.42 ± 0.07 | -5.42 ± 0.07 | -5.46 ± 0.07 | -5.46 ± 0.07 | -5.54 ± 0.07 | -5.51 ± 0.07 |
| Bacteria | <i>Pelotomaculum thermopropionicum</i> | -3.52 ± 0.05 | -3.97 ± 0.06 | -4.62 ± 0.06 | -4.87 ± 0.06 | -5.03 ± 0.07 | -5.33 ± 0.07 | -5.20 ± 0.06 | -5.20 ± 0.06 | -5.25 ± 0.06 | -5.24 ± 0.06 | -5.16 ± 0.06 | -5.28 ± 0.06 | -5.19 ± 0.06 |
| Bacteria | <i>Persephona marina</i>               | -1.96 ± 0.04 | -2.08 ± 0.05 | -2.46 ± 0.06 | -2.54 ± 0.05 | -2.68 ± 0.06 | -2.73 ± 0.05 | -2.61 ± 0.05 | -2.62 ± 0.05 | -2.64 ± 0.05 | -2.63 ± 0.05 | -2.58 ± 0.05 | -2.59 ± 0.05 | -2.63 ± 0.05 |
| Bacteria | <i>Petrotoga mobilis</i>               | -1.59 ± 0.04 | -1.65 ± 0.04 | -1.92 ± 0.05 | -1.96 ± 0.05 | -2.03 ± 0.05 | -2.06 ± 0.05 | -2.09 ± 0.05 | -2.12 ± 0.05 | -2.19 ± 0.05 | -2.28 ± 0.05 | -2.22 ± 0.05 | -2.11 ± 0.05 | -2.15 ± 0.05 |
| Bacteria | <i>Phenyllobacterium zucineum</i>      | -5.69 ± 0.05 | -6.80 ± 0.06 | -8.27 ± 0.06 | -8.83 ± 0.06 | -8.93 ± 0.07 | -8.88 ± 0.06 | -8.78 ± 0.06 | -8.76 ± 0.06 | -8.69 ± 0.06 | -8.60 ± 0.06 | -8.62 ± 0.06 | -8.70 ± 0.06 | -8.45 ± 0.06 |

Continued on next page

| Type     | Species                              | Window 1     | Window 2     | Window 3     | Window 4     | Window 5     | Window 6     | Window 7     | Window 8     | Window 9     | Window 10    | Window 11    | Window 12    | Window 13    |
|----------|--------------------------------------|--------------|--------------|--------------|--------------|--------------|--------------|--------------|--------------|--------------|--------------|--------------|--------------|--------------|
| Bacteria | <i>Photobacterium profundum</i>      | -2.17 ± 0.03 | -2.50 ± 0.03 | -3.09 ± 0.04 | -3.26 ± 0.04 | -3.35 ± 0.04 | -3.33 ± 0.04 | -3.22 ± 0.03 | -3.22 ± 0.03 | -3.26 ± 0.03 | -3.32 ± 0.03 | -3.31 ± 0.03 | -3.30 ± 0.03 | -3.35 ± 0.03 |
| Bacteria | <i>Photorhabdus luminescens</i>      | -2.14 ± 0.03 | -2.63 ± 0.04 | -3.33 ± 0.04 | -3.51 ± 0.04 | -3.55 ± 0.04 | -3.68 ± 0.04 | -3.59 ± 0.04 | -3.52 ± 0.04 | -3.53 ± 0.04 | -3.58 ± 0.04 | -3.48 ± 0.04 | -3.44 ± 0.04 | -3.47 ± 0.04 |
| Bacteria | <i>Polaromonas naphthalenivorans</i> | -2.95 ± 0.04 | -4.12 ± 0.05 | -5.79 ± 0.06 | -6.52 ± 0.06 | -6.88 ± 0.06 | -6.94 ± 0.06 | -6.89 ± 0.06 | -6.92 ± 0.06 | -7.04 ± 0.06 | -6.97 ± 0.06 | -7.01 ± 0.06 | -7.05 ± 0.05 | -6.99 ± 0.06 |
| Bacteria | <i>Polynucleobacter necessarius</i>  | -1.92 ± 0.04 | -2.39 ± 0.05 | -3.39 ± 0.06 | -4.35 ± 0.07 | -4.46 ± 0.06 | -4.31 ± 0.06 | -4.12 ± 0.06 | -4.06 ± 0.06 | -4.08 ± 0.06 | -3.88 ± 0.06 | -3.85 ± 0.06 | -3.99 ± 0.06 | -4.01 ± 0.06 |
| Bacteria | <i>Porphyromonas gingivalis</i>      | -2.27 ± 0.05 | -3.00 ± 0.06 | -4.18 ± 0.07 | -4.36 ± 0.07 | -4.39 ± 0.07 | -4.34 ± 0.06 | -4.20 ± 0.07 | -4.08 ± 0.07 | -4.32 ± 0.07 | -4.12 ± 0.06 | -4.23 ± 0.06 | -4.36 ± 0.07 | -4.39 ± 0.06 |
| Bacteria | <i>Prochlorococcus marinus</i>       | -1.51 ± 0.04 | -1.55 ± 0.04 | -2.03 ± 0.05 | -2.29 ± 0.05 | -2.17 ± 0.05 | -2.14 ± 0.05 | -2.11 ± 0.05 | -1.95 ± 0.05 | -2.03 ± 0.05 | -2.11 ± 0.05 | -2.04 ± 0.05 | -2.09 ± 0.05 | -2.09 ± 0.05 |
| Bacteria | <i>Propionibacterium acnes</i>       | -4.43 ± 0.06 | -5.18 ± 0.06 | -5.92 ± 0.07 | -6.03 ± 0.07 | -6.08 ± 0.07 | -6.04 ± 0.07 | -5.98 ± 0.07 | -5.93 ± 0.07 | -5.99 ± 0.06 | -5.99 ± 0.07 | -5.95 ± 0.07 | -5.94 ± 0.07 | -5.96 ± 0.06 |
| Bacteria | <i>Prosthecochloris aestuarii</i>    | -2.37 ± 0.04 | -3.06 ± 0.05 | -3.95 ± 0.06 | -4.39 ± 0.06 | -4.62 ± 0.06 | -4.42 ± 0.06 | -4.42 ± 0.06 | -4.34 ± 0.06 | -4.46 ± 0.06 | -4.38 ± 0.06 | -4.40 ± 0.06 | -4.46 ± 0.06 | -4.35 ± 0.06 |
| Bacteria | <i>Proteus mirabilis</i>             | -1.89 ± 0.03 | -2.41 ± 0.04 | -3.07 ± 0.05 | -3.24 ± 0.05 | -3.23 ± 0.04 | -3.29 ± 0.04 | -3.19 ± 0.04 | -3.05 ± 0.04 | -3.09 ± 0.04 | -3.19 ± 0.04 | -3.08 ± 0.04 | -3.04 ± 0.04 | -3.02 ± 0.04 |
| Bacteria | <i>Pseudoalteromonas atlantica</i>   | -1.99 ± 0.03 | -2.51 ± 0.03 | -3.35 ± 0.04 | -3.71 ± 0.04 | -3.74 ± 0.04 | -3.77 ± 0.04 | -3.68 ± 0.04 | -3.65 ± 0.04 | -3.69 ± 0.04 | -3.68 ± 0.04 | -3.74 ± 0.04 | -3.70 ± 0.04 | -3.68 ± 0.04 |
| Bacteria | <i>Pseudomonas aeruginosa</i>        | -3.93 ± 0.04 | -5.09 ± 0.04 | -6.58 ± 0.05 | -7.09 ± 0.05 | -7.28 ± 0.05 | -7.38 ± 0.05 | -7.36 ± 0.05 | -7.45 ± 0.05 | -7.51 ± 0.05 | -7.38 ± 0.05 | -7.46 ± 0.05 | -7.43 ± 0.05 | -7.37 ± 0.04 |
| Bacteria | <i>Psychrobacter arcticus</i>        | -1.74 ± 0.04 | -2.17 ± 0.05 | -2.94 ± 0.05 | -3.32 ± 0.06 | -3.54 ± 0.06 | -3.65 ± 0.06 | -3.67 ± 0.06 | -3.71 ± 0.06 | -3.71 ± 0.06 | -3.66 ± 0.06 | -3.83 ± 0.06 | -3.82 ± 0.06 | -3.80 ± 0.06 |
| Bacteria | <i>Psychromonas ingrahamii</i>       | -1.52 ± 0.03 | -1.98 ± 0.03 | -2.71 ± 0.04 | -3.02 ± 0.04 | -3.10 ± 0.04 | -3.08 ± 0.04 | -3.09 ± 0.04 | -3.08 ± 0.04 | -3.07 ± 0.04 | -3.11 ± 0.04 | -3.15 ± 0.04 | -3.12 ± 0.04 | -3.13 ± 0.04 |
| Bacteria | <i>Ralstonia solanacearum</i>        | -4.14 ± 0.05 | -5.35 ± 0.06 | -6.77 ± 0.06 | -7.50 ± 0.07 | -7.67 ± 0.06 | -7.93 ± 0.06 | -7.87 ± 0.06 | -7.77 ± 0.06 | -7.89 ± 0.06 | -7.83 ± 0.06 | -7.71 ± 0.06 | -7.77 ± 0.06 | -7.58 ± 0.06 |
| Bacteria | <i>Renibacterium salmoninarum</i>    | -4.36 ± 0.05 | -4.74 ± 0.05 | -5.26 ± 0.05 | -5.72 ± 0.06 | -5.56 ± 0.05 | -5.59 ± 0.05 | -5.68 ± 0.05 | -5.65 ± 0.05 | -5.67 ± 0.05 | -5.74 ± 0.05 | -5.66 ± 0.05 | -5.69 ± 0.05 | -5.63 ± 0.05 |
| Bacteria | <i>Rhizobium etli</i>                | -3.95 ± 0.04 | -4.77 ± 0.05 | -5.89 ± 0.05 | -6.28 ± 0.05 | -6.49 ± 0.05 | -6.55 ± 0.05 | -6.42 ± 0.05 | -6.40 ± 0.05 | -6.54 ± 0.05 | -6.44 ± 0.05 | -6.47 ± 0.05 | -6.45 ± 0.05 | -6.35 ± 0.05 |
| Bacteria | <i>Rhodobacter sphaeroides</i>       | -4.66 ± 0.05 | -5.92 ± 0.06 | -7.38 ± 0.07 | -7.84 ± 0.07 | -8.06 ± 0.06 | -8.10 ± 0.07 | -7.92 ± 0.06 | -8.02 ± 0.06 | -8.07 ± 0.06 | -7.92 ± 0.06 | -7.98 ± 0.06 | -7.95 ± 0.06 | -8.01 ± 0.06 |
| Bacteria | <i>Rhodococcus erythropolis</i>      | -4.51 ± 0.04 | -5.17 ± 0.04 | -6.14 ± 0.04 | -6.47 ± 0.04 | -6.54 ± 0.04 | -6.59 ± 0.04 | -6.56 ± 0.04 | -6.52 ± 0.04 | -6.52 ± 0.04 | -6.45 ± 0.04 | -6.51 ± 0.04 | -6.50 ± 0.04 | -6.50 ± 0.04 |
| Bacteria | <i>Rhodoferax ferrireducens</i>      | -2.85 ± 0.04 | -3.94 ± 0.05 | -5.60 ± 0.05 | -6.22 ± 0.05 | -6.38 ± 0.05 | -6.49 ± 0.05 | -6.44 ± 0.05 | -6.42 ± 0.05 | -6.47 ± 0.05 | -6.41 ± 0.05 | -6.51 ± 0.05 | -6.53 ± 0.05 | -6.35 ± 0.05 |
| Bacteria | <i>Rhodopirellula baltica</i>        | -3.95 ± 0.03 | -4.12 ± 0.04 | -4.51 ± 0.04 | -4.78 ± 0.04 | -4.96 ± 0.04 | -5.03 ± 0.04 | -5.07 ± 0.04 | -5.16 ± 0.04 | -5.13 ± 0.04 | -5.04 ± 0.04 | -5.14 ± 0.04 | -5.19 ± 0.04 | -5.23 ± 0.04 |
| Bacteria | <i>Rhodospseudomonas palustris</i>   | -4.35 ± 0.04 | -5.16 ± 0.04 | -6.47 ± 0.05 | -7.28 ± 0.05 | -7.51 ± 0.05 | -7.64 ± 0.05 | -7.50 ± 0.05 | -7.44 ± 0.05 | -7.43 ± 0.05 | -7.29 ± 0.05 | -7.30 ± 0.05 | -7.31 ± 0.05 | -7.24 ± 0.05 |
| Bacteria | <i>Rhodospirillum centenum</i>       | -5.21 ± 0.05 | -6.31 ± 0.06 | -7.71 ± 0.06 | -8.26 ± 0.06 | -8.64 ± 0.06 | -8.70 ± 0.06 | -8.59 ± 0.06 | -8.66 ± 0.06 | -8.66 ± 0.06 | -8.48 ± 0.06 | -8.55 ± 0.06 | -8.50 ± 0.06 | -8.40 ± 0.06 |
| Bacteria | <i>Rickettsia akari</i>              | -1.42 ± 0.05 | -1.49 ± 0.05 | -1.94 ± 0.06 | -2.07 ± 0.06 | -2.20 ± 0.07 | -2.18 ± 0.07 | -2.10 ± 0.06 | -2.08 ± 0.06 | -2.05 ± 0.06 | -2.08 ± 0.06 | -2.13 ± 0.06 | -2.04 ± 0.06 | -2.14 ± 0.06 |
| Bacteria | <i>Roseiflexus castenholzii</i>      | -3.86 ± 0.04 | -4.50 ± 0.04 | -5.55 ± 0.05 | -6.08 ± 0.05 | -6.23 ± 0.05 | -6.36 ± 0.05 | -6.37 ± 0.05 | -6.35 ± 0.05 | -6.36 ± 0.05 | -6.23 ± 0.05 | -6.18 ± 0.05 | -6.25 ± 0.05 | -6.22 ± 0.05 |
| Bacteria | <i>Roseobacter amonifigans</i>       | -3.41 ± 0.04 | -4.29 ± 0.05 | -5.58 ± 0.05 | -6.17 ± 0.05 | -6.18 ± 0.05 | -6.21 ± 0.05 | -6.08 ± 0.05 | -6.02 ± 0.05 | -6.05 ± 0.05 | -6.10 ± 0.05 | -6.06 ± 0.05 | -6.02 ± 0.05 | -6.02 ± 0.05 |
| Bacteria | <i>Rubrobacter xylanophilus</i>      | -6.54 ± 0.06 | -7.18 ± 0.06 | -8.07 ± 0.07 | -8.52 ± 0.07 | -8.85 ± 0.07 | -8.76 ± 0.07 | -8.76 ± 0.07 | -8.67 ± 0.07 | -8.70 ± 0.07 | -8.54 ± 0.07 | -8.52 ± 0.07 | -8.47 ± 0.07 | -8.35 ± 0.07 |
| Bacteria | <i>Ruegeria pomeroyi</i>             | -4.08 ± 0.05 | -5.03 ± 0.05 | -6.46 ± 0.06 | -7.08 ± 0.06 | -7.29 ± 0.06 | -7.38 ± 0.06 | -7.17 ± 0.06 | -7.27 ± 0.06 | -7.30 ± 0.06 | -7.27 ± 0.06 | -7.26 ± 0.06 | -7.31 ± 0.06 | -7.20 ± 0.05 |
| Bacteria | <i>Saccharophagus degradans</i>      | -2.11 ± 0.03 | -2.59 ± 0.04 | -3.55 ± 0.05 | -4.08 ± 0.05 | -4.33 ± 0.05 | -4.25 ± 0.05 | -4.22 ± 0.04 | -4.07 ± 0.04 | -4.02 ± 0.04 | -4.04 ± 0.04 | -3.97 ± 0.04 | -4.02 ± 0.04 | -4.00 ± 0.04 |
| Bacteria | <i>Saccharopolyspora erythraea</i>   | -6.51 ± 0.04 | -7.59 ± 0.04 | -8.50 ± 0.04 | -8.62 ± 0.04 | -8.71 ± 0.04 | -8.77 ± 0.04 | -8.70 ± 0.04 | -8.74 ± 0.04 | -8.80 ± 0.04 | -8.60 ± 0.04 | -8.60 ± 0.04 | -8.60 ± 0.04 | -8.54 ± 0.04 |
| Bacteria | <i>Salinibacter ruber</i>            | -4.67 ± 0.06 | -5.11 ± 0.06 | -5.89 ± 0.07 | -6.33 ± 0.07 | -6.64 ± 0.07 | -6.70 ± 0.07 | -6.64 ± 0.07 | -6.64 ± 0.07 | -6.83 ± 0.07 | -6.81 ± 0.07 | -6.87 ± 0.07 | -6.92 ± 0.07 | -6.88 ± 0.07 |
| Bacteria | <i>Salinispora arenicola</i>         | -5.95 ± 0.04 | -7.05 ± 0.05 | -8.06 ± 0.05 | -8.20 ± 0.05 | -8.18 ± 0.05 | -8.28 ± 0.05 | -8.15 ± 0.05 | -8.14 ± 0.05 | -8.32 ± 0.05 | -8.14 ± 0.05 | -8.12 ± 0.05 | -8.17 ± 0.05 | -8.10 ± 0.05 |
| Bacteria | <i>Salmonella enterica</i>           | -2.94 ± 0.04 | -3.56 ± 0.04 | -4.45 ± 0.05 | -4.72 ± 0.05 | -4.73 ± 0.05 | -4.81 ± 0.05 | -4.69 ± 0.05 | -4.67 ± 0.05 | -4.75 ± 0.05 | -4.69 ± 0.05 | -4.70 ± 0.05 | -4.84 ± 0.05 | -4.75 ± 0.05 |
| Bacteria | <i>Serratia proteamaculans</i>       | -2.78 ± 0.03 | -3.85 ± 0.04 | -5.09 ± 0.05 | -5.44 ± 0.05 | -5.57 ± 0.05 | -5.60 ± 0.05 | -5.54 ± 0.05 | -5.44 ± 0.05 | -5.60 ± 0.05 | -5.57 ± 0.05 | -5.48 ± 0.05 | -5.58 ± 0.05 | -5.58 ± 0.05 |
| Bacteria | <i>Shewanella amazonensis</i>        | -2.77 ± 0.04 | -3.76 ± 0.05 | -4.88 ± 0.05 | -5.23 ± 0.05 | -5.42 ± 0.05 | -5.27 ± 0.05 | -5.09 ± 0.05 | -5.04 ± 0.05 | -5.11 ± 0.05 | -5.12 ± 0.05 | -5.12 ± 0.05 | -5.18 ± 0.05 | -5.09 ± 0.05 |
| Bacteria | <i>Shigella boydii</i>               | -3.07 ± 0.04 | -3.63 ± 0.04 | -4.75 ± 0.05 | -5.01 ± 0.05 | -4.89 ± 0.05 | -4.70 ± 0.05 | -4.85 ± 0.05 | -4.74 ± 0.05 | -4.71 ± 0.05 | -4.71 ± 0.05 | -4.66 ± 0.05 | -4.76 ± 0.05 | -4.72 ± 0.05 |
| Bacteria | <i>Sinorhizobium medicae</i>         | -3.83 ± 0.04 | -4.72 ± 0.05 | -6.05 ± 0.06 | -6.59 ± 0.06 | -6.71 ± 0.06 | -6.75 ± 0.06 | -6.60 ± 0.06 | -6.57 ± 0.05 | -6.59 ± 0.05 | -6.52 ± 0.05 | -6.43 ± 0.05 | -6.50 ± 0.05 | -6.43 ± 0.05 |
| Bacteria | <i>Sodalis glossinidius</i>          | -3.02 ± 0.05 | -3.87 ± 0.06 | -5.08 ± 0.07 | -5.34 ± 0.07 | -5.52 ± 0.07 | -5.43 ± 0.07 | -5.41 ± 0.07 | -5.31 ± 0.07 | -5.28 ± 0.07 | -5.34 ± 0.07 | -5.44 ± 0.07 | -5.48 ± 0.07 | -5.37 ± 0.07 |
| Bacteria | <i>Solibacter usitatus</i>           | -4.17 ± 0.03 | -4.89 ± 0.03 | -5.92 ± 0.04 | -6.55 ± 0.04 | -6.53 ± 0.04 | -6.46 ± 0.04 | -6.33 ± 0.04 | -6.35 ± 0.04 | -6.32 ± 0.04 | -6.30 ± 0.04 | -6.29 ± 0.04 | -6.31 ± 0.04 | -6.19 ± 0.04 |
| Bacteria | <i>Sorangium cellulosum</i>          | -5.70 ± 0.03 | -6.41 ± 0.04 | -7.41 ± 0.04 | -7.98 ± 0.04 | -8.35 ± 0.04 | -8.61 ± 0.04 | -8.63 ± 0.04 | -8.65 ± 0.04 | -8.69 ± 0.04 | -8.62 ± 0.04 | -8.57 ± 0.04 | -8.65 ± 0.04 | -8.58 ± 0.04 |

Continued on next page

| Type     | Species                                    | Window 1     | Window 2     | Window 3     | Window 4     | Window 5     | Window 6     | Window 7     | Window 8     | Window 9     | Window 10    | Window 11    | Window 12    | Window 13    |
|----------|--------------------------------------------|--------------|--------------|--------------|--------------|--------------|--------------|--------------|--------------|--------------|--------------|--------------|--------------|--------------|
| Bacteria | <i>Sphingomonas wittichii</i>              | -5.00 ± 0.04 | -6.16 ± 0.05 | -7.61 ± 0.05 | -8.17 ± 0.05 | -8.21 ± 0.05 | -8.41 ± 0.05 | -8.25 ± 0.05 | -8.26 ± 0.05 | -8.25 ± 0.05 | -8.15 ± 0.05 | -8.11 ± 0.05 | -8.14 ± 0.05 | -8.05 ± 0.05 |
| Bacteria | <i>Sphingopyxis alaskensis</i>             | -4.50 ± 0.05 | -5.52 ± 0.06 | -6.95 ± 0.07 | -7.42 ± 0.07 | -7.65 ± 0.06 | -7.64 ± 0.06 | -7.63 ± 0.06 | -7.41 ± 0.06 | -7.52 ± 0.06 | -7.44 ± 0.06 | -7.40 ± 0.06 | -7.49 ± 0.06 | -7.43 ± 0.06 |
| Bacteria | <i>Staphylococcus aureus</i>               | -1.52 ± 0.03 | -1.66 ± 0.04 | -2.02 ± 0.04 | -2.19 ± 0.04 | -2.14 ± 0.04 | -2.21 ± 0.04 | -2.11 ± 0.04 | -2.07 ± 0.04 | -2.16 ± 0.04 | -2.17 ± 0.04 | -2.12 ± 0.04 | -2.09 ± 0.04 | -2.14 ± 0.04 |
| Bacteria | <i>Stenotrophomonas maltophilia</i>        | -4.29 ± 0.05 | -5.41 ± 0.05 | -6.86 ± 0.06 | -7.43 ± 0.06 | -7.65 ± 0.06 | -7.82 ± 0.05 | -7.70 ± 0.05 | -7.63 ± 0.05 | -7.68 ± 0.05 | -7.67 ± 0.05 | -7.62 ± 0.05 | -7.68 ± 0.05 | -7.55 ± 0.05 |
| Bacteria | <i>Streptococcus agalactiae</i>            | -1.47 ± 0.04 | -2.04 ± 0.05 | -2.59 ± 0.05 | -2.68 ± 0.05 | -2.53 ± 0.05 | -2.51 ± 0.05 | -2.55 ± 0.05 | -2.39 ± 0.05 | -2.50 ± 0.05 | -2.64 ± 0.05 | -2.73 ± 0.05 | -2.56 ± 0.05 | -2.49 ± 0.05 |
| Bacteria | <i>Streptomyces avermitilis</i>            | -5.71 ± 0.04 | -6.64 ± 0.04 | -7.58 ± 0.04 | -7.91 ± 0.04 | -8.06 ± 0.04 | -8.31 ± 0.04 | -8.25 ± 0.04 | -8.20 ± 0.04 | -8.27 ± 0.04 | -8.16 ± 0.04 | -8.14 ± 0.04 | -8.21 ± 0.04 | -8.07 ± 0.04 |
| Bacteria | <i>Sulfurihydrogenibium azorense</i>       | -1.58 ± 0.04 | -1.69 ± 0.04 | -1.87 ± 0.05 | -1.94 ± 0.05 | -2.00 ± 0.05 | -2.05 ± 0.05 | -2.04 ± 0.05 | -1.94 ± 0.05 | -2.01 ± 0.05 | -1.99 ± 0.05 | -1.93 ± 0.05 | -1.97 ± 0.05 | -1.97 ± 0.05 |
| Bacteria | <i>Sulfurimonas denitrificans</i>          | -1.38 ± 0.03 | -1.72 ± 0.04 | -2.24 ± 0.05 | -2.48 ± 0.05 | -2.54 ± 0.05 | -2.52 ± 0.05 | -2.49 ± 0.05 | -2.40 ± 0.05 | -2.43 ± 0.05 | -2.54 ± 0.05 | -2.44 ± 0.05 | -2.45 ± 0.05 | -2.42 ± 0.05 |
| Bacteria | <i>Sulfurovum sp. NBC37-1</i>              | -1.62 ± 0.04 | -2.24 ± 0.04 | -3.14 ± 0.05 | -3.46 ± 0.06 | -3.50 ± 0.06 | -3.54 ± 0.05 | -3.42 ± 0.05 | -3.30 ± 0.05 | -3.48 ± 0.05 | -3.48 ± 0.05 | -3.46 ± 0.05 | -3.50 ± 0.05 | -3.53 ± 0.05 |
| Bacteria | <i>Symbiobacterium thermophilum</i>        | -6.05 ± 0.05 | -6.86 ± 0.06 | -7.52 ± 0.06 | -7.73 ± 0.06 | -7.86 ± 0.06 | -7.92 ± 0.06 | -7.91 ± 0.06 | -7.98 ± 0.06 | -8.04 ± 0.06 | -7.83 ± 0.06 | -7.85 ± 0.06 | -8.06 ± 0.06 | -7.96 ± 0.06 |
| Bacteria | <i>Synechococcus elongatus</i>             | -3.92 ± 0.05 | -4.20 ± 0.05 | -5.14 ± 0.06 | -5.40 ± 0.06 | -5.56 ± 0.06 | -5.48 ± 0.06 | -5.44 ± 0.06 | -5.40 ± 0.06 | -5.49 ± 0.06 | -5.48 ± 0.06 | -5.42 ± 0.06 | -5.45 ± 0.06 | -5.37 ± 0.06 |
| Bacteria | <i>Synechocystis sp. PCC 6803</i>          | -2.42 ± 0.04 | -2.65 ± 0.04 | -3.32 ± 0.05 | -3.85 ± 0.05 | -4.10 ± 0.05 | -4.19 ± 0.05 | -4.20 ± 0.05 | -4.22 ± 0.05 | -4.17 ± 0.05 | -4.07 ± 0.05 | -4.03 ± 0.05 | -4.06 ± 0.05 | -4.02 ± 0.05 |
| Bacteria | <i>Syntrophobacter fumaroxidans</i>        | -3.88 ± 0.04 | -4.44 ± 0.04 | -5.16 ± 0.05 | -5.66 ± 0.05 | -5.93 ± 0.05 | -6.02 ± 0.05 | -6.02 ± 0.05 | -5.99 ± 0.05 | -6.07 ± 0.05 | -5.96 ± 0.05 | -6.03 ± 0.05 | -5.98 ± 0.05 | -6.03 ± 0.05 |
| Bacteria | <i>Syntrophomonas wolfei</i>               | -2.44 ± 0.04 | -2.80 ± 0.05 | -3.30 ± 0.05 | -3.40 ± 0.06 | -3.60 ± 0.06 | -3.74 ± 0.06 | -3.79 ± 0.06 | -3.72 ± 0.06 | -3.79 ± 0.06 | -3.80 ± 0.06 | -3.75 ± 0.06 | -3.78 ± 0.06 | -3.75 ± 0.05 |
| Bacteria | <i>Syntrophus aciditrophicus</i>           | -2.82 ± 0.04 | -3.19 ± 0.05 | -3.72 ± 0.05 | -3.98 ± 0.05 | -4.28 ± 0.05 | -4.39 ± 0.06 | -4.39 ± 0.06 | -4.34 ± 0.05 | -4.49 ± 0.05 | -4.42 ± 0.05 | -4.51 ± 0.05 | -4.60 ± 0.05 | -4.52 ± 0.05 |
| Bacteria | <i>Thauera sp. MZ1T</i>                    | -3.85 ± 0.05 | -5.21 ± 0.05 | -6.99 ± 0.06 | -7.52 ± 0.06 | -7.76 ± 0.06 | -7.91 ± 0.06 | -7.91 ± 0.06 | -7.88 ± 0.06 | -7.83 ± 0.06 | -7.89 ± 0.06 | -7.88 ± 0.06 | -7.95 ± 0.06 | -7.82 ± 0.06 |
| Bacteria | <i>Thermoanaerobacter pseudethanolicus</i> | -1.72 ± 0.04 | -1.86 ± 0.04 | -2.11 ± 0.05 | -2.18 ± 0.05 | -2.21 ± 0.05 | -2.27 ± 0.05 | -2.25 ± 0.05 | -2.18 ± 0.05 | -2.25 ± 0.05 | -2.26 ± 0.05 | -2.15 ± 0.04 | -2.19 ± 0.04 | -2.19 ± 0.04 |
| Bacteria | <i>Thermobifida fusca</i>                  | -5.35 ± 0.05 | -6.13 ± 0.06 | -6.93 ± 0.06 | -7.06 ± 0.06 | -7.23 ± 0.06 | -7.22 ± 0.06 | -7.31 ± 0.06 | -7.30 ± 0.06 | -7.32 ± 0.06 | -7.31 ± 0.06 | -7.24 ± 0.06 | -7.19 ± 0.06 | -7.17 ± 0.06 |
| Bacteria | <i>Thermodesulfobivrio yellowstonii</i>    | -1.65 ± 0.04 | -1.71 ± 0.04 | -1.96 ± 0.05 | -2.19 ± 0.05 | -2.40 ± 0.05 | -2.38 ± 0.05 | -2.33 ± 0.05 | -2.23 ± 0.05 | -2.32 ± 0.05 | -2.31 ± 0.05 | -2.22 ± 0.05 | -2.28 ± 0.05 | -2.17 ± 0.05 |
| Bacteria | <i>Thermomicrobium roseum</i>              | -5.67 ± 0.06 | -5.88 ± 0.07 | -6.28 ± 0.07 | -6.44 ± 0.07 | -6.75 ± 0.08 | -6.88 ± 0.07 | -6.81 ± 0.07 | -6.78 ± 0.08 | -6.67 ± 0.07 | -6.67 ± 0.07 | -6.69 ± 0.07 | -6.66 ± 0.07 | -6.60 ± 0.08 |
| Bacteria | <i>Thermosipho africanus</i>               | -1.65 ± 0.04 | -1.58 ± 0.04 | -1.76 ± 0.05 | -1.83 ± 0.05 | -1.77 ± 0.05 | -1.79 ± 0.04 | -1.88 ± 0.05 | -1.86 ± 0.04 | -1.90 ± 0.05 | -1.93 ± 0.05 | -1.92 ± 0.05 | -2.01 ± 0.05 | -2.03 ± 0.05 |
| Bacteria | <i>Thermosynechococcus elongatus</i>       | -3.42 ± 0.05 | -3.68 ± 0.05 | -4.29 ± 0.06 | -4.78 ± 0.06 | -4.95 ± 0.06 | -4.94 ± 0.06 | -4.80 ± 0.06 | -5.02 ± 0.06 | -4.91 ± 0.06 | -4.95 ± 0.06 | -4.86 ± 0.06 | -5.02 ± 0.06 | -4.83 ± 0.06 |
| Bacteria | <i>Thermotoga lettingae</i>                | -2.25 ± 0.04 | -2.38 ± 0.05 | -2.51 ± 0.05 | -2.64 ± 0.05 | -2.56 ± 0.05 | -2.63 ± 0.05 | -2.66 ± 0.05 | -2.75 ± 0.05 | -2.81 ± 0.05 | -2.92 ± 0.05 | -2.71 ± 0.05 | -2.71 ± 0.05 | -2.74 ± 0.05 |
| Bacteria | <i>Thermus thermophilus</i>                | -6.09 ± 0.07 | -6.41 ± 0.07 | -7.34 ± 0.08 | -8.21 ± 0.09 | -8.41 ± 0.09 | -8.54 ± 0.09 | -8.15 ± 0.08 | -8.28 ± 0.09 | -8.45 ± 0.09 | -8.24 ± 0.09 | -8.31 ± 0.09 | -8.34 ± 0.09 | -8.09 ± 0.09 |
| Bacteria | <i>Thioalkalivibrio sp. HL-EbGR7</i>       | -3.68 ± 0.05 | -4.86 ± 0.06 | -6.29 ± 0.06 | -7.17 ± 0.06 | -7.43 ± 0.06 | -7.56 ± 0.06 | -7.37 ± 0.06 | -7.37 ± 0.06 | -7.39 ± 0.06 | -7.23 ± 0.06 | -7.31 ± 0.06 | -7.30 ± 0.06 | -7.23 ± 0.06 |
| Bacteria | <i>Thiobacillus denitrificans</i>          | -4.19 ± 0.06 | -5.20 ± 0.06 | -6.48 ± 0.07 | -7.23 ± 0.07 | -7.47 ± 0.07 | -7.51 ± 0.07 | -7.34 ± 0.07 | -7.35 ± 0.07 | -7.39 ± 0.07 | -7.31 ± 0.07 | -7.23 ± 0.07 | -7.27 ± 0.07 | -7.16 ± 0.06 |
| Bacteria | <i>Thiomicrospira crunogena</i>            | -1.83 ± 0.04 | -2.20 ± 0.05 | -2.97 ± 0.05 | -3.45 ± 0.06 | -3.62 ± 0.06 | -3.64 ± 0.06 | -3.49 ± 0.06 | -3.50 ± 0.06 | -3.57 ± 0.06 | -3.58 ± 0.05 | -3.50 ± 0.05 | -3.55 ± 0.06 | -3.57 ± 0.06 |
| Bacteria | <i>Tolomonas auensis</i>                   | -2.46 ± 0.04 | -3.27 ± 0.05 | -4.33 ± 0.06 | -4.56 ± 0.05 | -4.65 ± 0.05 | -4.63 ± 0.05 | -4.61 ± 0.05 | -4.43 ± 0.05 | -4.44 ± 0.05 | -4.47 ± 0.05 | -4.53 ± 0.05 | -4.56 ± 0.05 | -4.52 ± 0.05 |
| Bacteria | <i>Treponema denticola</i>                 | -1.49 ± 0.03 | -1.89 ± 0.04 | -2.51 ± 0.05 | -2.65 ± 0.05 | -2.71 ± 0.05 | -2.88 ± 0.05 | -2.80 ± 0.05 | -2.84 ± 0.05 | -2.91 ± 0.05 | -2.96 ± 0.05 | -2.90 ± 0.05 | -2.86 ± 0.05 | -2.82 ± 0.05 |
| Bacteria | <i>Trichodesmium erythraeum</i>            | -1.54 ± 0.03 | -1.68 ± 0.03 | -2.11 ± 0.03 | -2.43 ± 0.04 | -2.48 ± 0.04 | -2.54 ± 0.03 | -2.47 ± 0.03 | -2.38 ± 0.03 | -2.40 ± 0.03 | -2.48 ± 0.03 | -2.41 ± 0.03 | -2.36 ± 0.03 | -2.40 ± 0.03 |
| Bacteria | <i>Tropheryma whipplei</i>                 | -3.33 ± 0.09 | -3.55 ± 0.09 | -3.95 ± 0.10 | -4.05 ± 0.10 | -3.98 ± 0.10 | -4.07 ± 0.10 | -4.07 ± 0.10 | -3.87 ± 0.09 | -3.97 ± 0.09 | -3.98 ± 0.09 | -3.94 ± 0.10 | -3.97 ± 0.10 | -4.02 ± 0.09 |
| Bacteria | <i>Ureaplasma parvum</i>                   | -1.38 ± 0.12 | -1.45 ± 0.15 | -1.74 ± 0.15 | -1.77 ± 0.15 | -1.62 ± 0.14 | -1.56 ± 0.16 | -1.68 ± 0.16 | -1.52 ± 0.14 | -1.67 ± 0.15 | -1.64 ± 0.14 | -1.68 ± 0.15 | -1.56 ± 0.15 | -1.45 ± 0.14 |
| Bacteria | <i>Variovorax paradoxus</i>                | -3.63 ± 0.04 | -5.10 ± 0.04 | -6.99 ± 0.05 | -7.81 ± 0.05 | -7.97 ± 0.05 | -8.07 ± 0.05 | -8.05 ± 0.05 | -7.98 ± 0.04 | -8.06 ± 0.05 | -7.98 ± 0.04 | -7.92 ± 0.04 | -8.04 ± 0.04 | -7.93 ± 0.04 |
| Bacteria | <i>Verminephrobacter eiseniae</i>          | -4.11 ± 0.04 | -5.22 ± 0.05 | -6.76 ± 0.05 | -7.30 ± 0.05 | -7.48 ± 0.05 | -7.51 ± 0.05 | -7.41 ± 0.05 | -7.45 ± 0.05 | -7.57 ± 0.05 | -7.40 ± 0.05 | -7.47 ± 0.05 | -7.52 ± 0.05 | -7.41 ± 0.05 |
| Bacteria | <i>Vibrio cholerae</i>                     | -2.48 ± 0.04 | -2.91 ± 0.04 | -3.62 ± 0.05 | -3.98 ± 0.05 | -4.09 ± 0.05 | -4.10 ± 0.05 | -3.90 ± 0.05 | -3.93 ± 0.05 | -4.14 ± 0.05 | -4.07 ± 0.05 | -4.05 ± 0.05 | -4.16 ± 0.05 | -4.14 ± 0.05 |
| Bacteria | <i>Wigglesworthia glossinidia</i>          | -1.17 ± 0.06 | -1.19 ± 0.06 | -1.49 ± 0.07 | -1.65 ± 0.08 | -1.64 ± 0.08 | -1.52 ± 0.08 | -1.52 ± 0.07 | -1.50 ± 0.07 | -1.53 ± 0.07 | -1.64 ± 0.07 | -1.47 ± 0.07 | -1.43 ± 0.07 | -1.34 ± 0.06 |
| Bacteria | <i>Wolbachia endosymbiont</i>              | -1.52 ± 0.04 | -1.69 ± 0.05 | -2.08 ± 0.06 | -2.41 ± 0.06 | -2.52 ± 0.06 | -2.43 ± 0.06 | -2.32 ± 0.06 | -2.21 ± 0.06 | -2.17 ± 0.06 | -2.21 ± 0.06 | -2.31 ± 0.06 | -2.16 ± 0.06 | -2.13 ± 0.06 |
| Bacteria | <i>Wolinella succinogenes</i>              | -2.56 ± 0.05 | -3.10 ± 0.06 | -3.96 ± 0.07 | -4.19 ± 0.07 | -4.22 ± 0.07 | -4.20 ± 0.06 | -3.99 ± 0.06 | -4.10 ± 0.06 | -4.15 ± 0.06 | -4.14 ± 0.06 | -4.07 ± 0.06 | -4.07 ± 0.06 | -4.07 ± 0.06 |
| Bacteria | <i>Xanthobacter autotrophicus</i>          | -4.79 ± 0.04 | -5.71 ± 0.05 | -6.98 ± 0.05 | -7.51 ± 0.06 | -7.75 ± 0.05 | -7.81 ± 0.05 | -7.77 ± 0.05 | -7.69 ± 0.05 | -7.74 ± 0.05 | -7.68 ± 0.05 | -7.62 ± 0.05 | -7.75 ± 0.05 | -7.71 ± 0.05 |

Continued on next page

| Type     | Species                                       | Window 1     | Window 2     | Window 3     | Window 4     | Window 5     | Window 6     | Window 7     | Window 8     | Window 9     | Window 10    | Window 11    | Window 12    | Window 13    |
|----------|-----------------------------------------------|--------------|--------------|--------------|--------------|--------------|--------------|--------------|--------------|--------------|--------------|--------------|--------------|--------------|
| Bacteria | <i>Xanthomonas axonopodis</i>                 | -4.52 ± 0.05 | -5.34 ± 0.05 | -6.58 ± 0.05 | -7.15 ± 0.05 | -7.36 ± 0.05 | -7.44 ± 0.05 | -7.37 ± 0.05 | -7.41 ± 0.05 | -7.49 ± 0.05 | -7.36 ± 0.05 | -7.40 ± 0.05 | -7.37 ± 0.05 | -7.35 ± 0.05 |
| Bacteria | <i>Xylella fastidiosa</i>                     | -3.24 ± 0.05 | -3.50 ± 0.06 | -4.08 ± 0.06 | -4.47 ± 0.06 | -4.58 ± 0.06 | -4.61 ± 0.06 | -4.66 ± 0.06 | -4.61 ± 0.06 | -4.56 ± 0.06 | -4.62 ± 0.06 | -4.57 ± 0.06 | -4.62 ± 0.06 | -4.55 ± 0.06 |
| Bacteria | <i>Yersinia enterocolitica</i>                | -2.51 ± 0.03 | -3.21 ± 0.04 | -4.11 ± 0.05 | -4.37 ± 0.05 | -4.32 ± 0.05 | -4.41 ± 0.05 | -4.33 ± 0.05 | -4.22 ± 0.04 | -4.24 ± 0.05 | -4.25 ± 0.05 | -4.29 ± 0.05 | -4.24 ± 0.04 | -4.21 ± 0.04 |
| Bacteria | <i>Zymomonas mobilis</i>                      | -2.92 ± 0.06 | -3.20 ± 0.06 | -3.91 ± 0.07 | -4.18 ± 0.07 | -4.30 ± 0.07 | -4.38 ± 0.07 | -4.18 ± 0.07 | -4.20 ± 0.07 | -4.23 ± 0.07 | -4.33 ± 0.07 | -4.21 ± 0.07 | -4.19 ± 0.06 | -4.20 ± 0.07 |
| Archaea  | <i>Aeropyrum pernix</i>                       | -5.01 ± 0.07 | -5.13 ± 0.08 | -5.31 ± 0.08 | -5.36 ± 0.08 | -5.35 ± 0.08 | -5.42 ± 0.08 | -5.40 ± 0.08 | -5.37 ± 0.08 | -5.47 ± 0.08 | -5.38 ± 0.08 | -5.40 ± 0.08 | -5.36 ± 0.08 | -5.38 ± 0.08 |
| Archaea  | <i>Caldivirga maquilingensis</i>              | -3.16 ± 0.05 | -3.21 ± 0.06 | -3.44 ± 0.06 | -3.47 ± 0.06 | -3.42 ± 0.06 | -3.54 ± 0.06 | -3.51 ± 0.06 | -3.33 ± 0.06 | -3.40 ± 0.06 | -3.41 ± 0.06 | -3.46 ± 0.06 | -3.46 ± 0.06 | -3.50 ± 0.06 |
| Archaea  | <i>Desulfurococcus kamchatkensis</i>          | -3.15 ± 0.06 | -3.13 ± 0.06 | -3.37 ± 0.07 | -3.48 ± 0.07 | -3.50 ± 0.07 | -3.54 ± 0.07 | -3.47 ± 0.07 | -3.60 ± 0.07 | -3.60 ± 0.07 | -3.47 ± 0.07 | -3.51 ± 0.07 | -3.48 ± 0.07 | -3.43 ± 0.07 |
| Archaea  | <i>Haloarcula marismortui</i>                 | -4.79 ± 0.05 | -5.56 ± 0.05 | -6.12 ± 0.06 | -6.28 ± 0.06 | -6.40 ± 0.06 | -6.50 ± 0.06 | -6.50 ± 0.06 | -6.52 ± 0.06 | -6.53 ± 0.06 | -6.51 ± 0.06 | -6.44 ± 0.05 | -6.48 ± 0.06 | -6.32 ± 0.05 |
| Archaea  | <i>Halobacterium salinarum</i>                | -5.54 ± 0.06 | -6.60 ± 0.07 | -7.40 ± 0.08 | -7.33 ± 0.07 | -7.66 ± 0.08 | -7.71 ± 0.08 | -7.65 ± 0.08 | -7.64 ± 0.08 | -7.64 ± 0.08 | -7.56 ± 0.08 | -7.48 ± 0.08 | -7.64 ± 0.08 | -7.56 ± 0.08 |
| Archaea  | <i>Haloquadratum walsbyi</i>                  | -3.44 ± 0.05 | -3.79 ± 0.05 | -4.13 ± 0.06 | -4.17 ± 0.05 | -4.27 ± 0.05 | -4.23 ± 0.05 | -4.36 ± 0.06 | -4.19 ± 0.05 | -4.20 ± 0.05 | -4.14 ± 0.05 | -4.15 ± 0.05 | -4.16 ± 0.05 | -4.09 ± 0.05 |
| Archaea  | <i>Halorubrum lacusprofundi</i>               | -5.10 ± 0.05 | -6.24 ± 0.06 | -6.92 ± 0.06 | -7.05 ± 0.06 | -7.21 ± 0.06 | -7.53 ± 0.06 | -7.40 ± 0.06 | -7.39 ± 0.06 | -7.41 ± 0.06 | -7.28 ± 0.06 | -7.29 ± 0.06 | -7.37 ± 0.06 | -7.25 ± 0.06 |
| Archaea  | <i>Hyperthermus butylicus</i>                 | -4.92 ± 0.07 | -4.87 ± 0.07 | -4.89 ± 0.07 | -4.95 ± 0.07 | -4.84 ± 0.07 | -5.06 ± 0.07 | -5.08 ± 0.07 | -5.08 ± 0.07 | -4.90 ± 0.07 | -4.82 ± 0.07 | -4.89 ± 0.07 | -4.92 ± 0.07 | -4.91 ± 0.07 |
| Archaea  | <i>Ignicoccus hospitalis</i>                  | -4.92 ± 0.08 | -5.09 ± 0.09 | -5.11 ± 0.09 | -5.25 ± 0.09 | -5.23 ± 0.09 | -5.19 ± 0.09 | -5.16 ± 0.09 | -5.13 ± 0.08 | -5.12 ± 0.09 | -5.11 ± 0.09 | -5.25 ± 0.09 | -5.19 ± 0.08 | -5.11 ± 0.09 |
| Archaea  | <i>Metallosphaera sedula</i>                  | -2.95 ± 0.05 | -3.07 ± 0.05 | -3.43 ± 0.05 | -3.60 ± 0.06 | -3.63 ± 0.06 | -3.72 ± 0.06 | -3.70 ± 0.06 | -3.67 ± 0.06 | -3.62 ± 0.05 | -3.62 ± 0.05 | -3.61 ± 0.06 | -3.67 ± 0.06 | -3.75 ± 0.05 |
| Archaea  | <i>Methanobrevibacter smithii</i>             | -1.37 ± 0.04 | -1.62 ± 0.04 | -2.01 ± 0.05 | -2.16 ± 0.05 | -2.17 ± 0.05 | -2.16 ± 0.05 | -2.12 ± 0.05 | -2.14 ± 0.05 | -2.14 ± 0.05 | -2.20 ± 0.05 | -2.20 ± 0.05 | -2.11 ± 0.05 | -2.15 ± 0.05 |
| Archaea  | <i>Methanocaldococcus jannaschii</i>          | -1.71 ± 0.04 | -1.65 ± 0.04 | -1.71 ± 0.05 | -1.83 ± 0.05 | -1.79 ± 0.05 | -1.78 ± 0.05 | -1.84 ± 0.05 | -1.78 ± 0.05 | -1.76 ± 0.05 | -1.85 ± 0.05 | -1.86 ± 0.05 | -1.88 ± 0.05 | -1.93 ± 0.05 |
| Archaea  | <i>Methanococcoides burtonii</i>              | -1.92 ± 0.04 | -2.26 ± 0.04 | -2.98 ± 0.05 | -3.24 ± 0.05 | -3.34 ± 0.05 | -3.40 ± 0.05 | -3.34 ± 0.05 | -3.33 ± 0.05 | -3.28 ± 0.05 | -3.30 ± 0.05 | -3.19 ± 0.05 | -3.23 ± 0.05 | -3.23 ± 0.05 |
| Archaea  | <i>Methanococcus aeolicus</i>                 | -1.31 ± 0.04 | -1.40 ± 0.04 | -1.82 ± 0.05 | -2.00 ± 0.06 | -1.91 ± 0.05 | -1.86 ± 0.05 | -1.93 ± 0.05 | -1.90 ± 0.05 | -1.97 ± 0.06 | -1.92 ± 0.05 | -1.97 ± 0.05 | -2.03 ± 0.06 | -1.98 ± 0.05 |
| Archaea  | <i>Methanocorpusculum labreanum</i>           | -2.58 ± 0.05 | -3.29 ± 0.06 | -4.24 ± 0.07 | -4.49 ± 0.07 | -4.25 ± 0.07 | -4.44 ± 0.07 | -4.42 ± 0.07 | -4.41 ± 0.07 | -4.37 ± 0.07 | -4.43 ± 0.07 | -4.37 ± 0.07 | -4.46 ± 0.07 | -4.49 ± 0.07 |
| Archaea  | <i>Methanoculleus marisnigri</i>              | -4.18 ± 0.06 | -4.98 ± 0.06 | -5.82 ± 0.07 | -6.19 ± 0.07 | -6.30 ± 0.07 | -6.47 ± 0.07 | -6.46 ± 0.07 | -6.61 ± 0.07 | -6.48 ± 0.07 | -6.32 ± 0.07 | -6.45 ± 0.07 | -6.50 ± 0.07 | -6.33 ± 0.06 |
| Archaea  | <i>Methanopyrus kandleri</i>                  | -5.57 ± 0.07 | -5.78 ± 0.07 | -5.92 ± 0.07 | -6.01 ± 0.08 | -6.11 ± 0.08 | -6.02 ± 0.07 | -6.05 ± 0.07 | -5.97 ± 0.07 | -5.92 ± 0.07 | -5.91 ± 0.07 | -5.91 ± 0.07 | -5.90 ± 0.07 | -5.96 ± 0.07 |
| Archaea  | <i>Methanosaepta thermophila</i>              | -3.88 ± 0.06 | -4.36 ± 0.07 | -4.82 ± 0.07 | -5.04 ± 0.07 | -5.25 ± 0.07 | -5.32 ± 0.07 | -5.29 ± 0.07 | -5.20 ± 0.07 | -5.09 ± 0.07 | -5.06 ± 0.07 | -5.12 ± 0.07 | -5.18 ± 0.07 | -5.15 ± 0.07 |
| Archaea  | <i>Methanosarcina acetivorans</i>             | -2.31 ± 0.03 | -2.52 ± 0.03 | -2.95 ± 0.04 | -3.13 ± 0.04 | -3.25 ± 0.04 | -3.40 ± 0.04 | -3.50 ± 0.04 | -3.45 ± 0.04 | -3.48 ± 0.04 | -3.36 ± 0.04 | -3.37 ± 0.04 | -3.44 ± 0.04 | -3.43 ± 0.04 |
| Archaea  | <i>Methanosphaera stadtmanae</i>              | -1.18 ± 0.04 | -1.39 ± 0.04 | -1.71 ± 0.05 | -1.86 ± 0.05 | -1.76 ± 0.05 | -1.81 ± 0.05 | -1.80 ± 0.05 | -1.75 ± 0.05 | -1.82 ± 0.05 | -1.83 ± 0.05 | -1.87 ± 0.05 | -1.82 ± 0.05 | -1.85 ± 0.05 |
| Archaea  | <i>Methanosphaerula palustris</i>             | -3.31 ± 0.05 | -4.02 ± 0.06 | -4.90 ± 0.06 | -5.10 ± 0.06 | -5.13 ± 0.06 | -5.20 ± 0.06 | -5.35 ± 0.06 | -5.28 ± 0.06 | -5.28 ± 0.06 | -5.25 ± 0.06 | -5.35 ± 0.06 | -5.46 ± 0.06 | -5.36 ± 0.06 |
| Archaea  | <i>Methanospirillum hungatei</i>              | -2.68 ± 0.04 | -3.01 ± 0.04 | -3.41 ± 0.05 | -3.65 ± 0.05 | -3.63 ± 0.05 | -3.75 ± 0.05 | -3.63 ± 0.05 | -3.59 ± 0.05 | -3.65 ± 0.05 | -3.67 ± 0.05 | -3.64 ± 0.05 | -3.69 ± 0.05 | -3.70 ± 0.05 |
| Archaea  | <i>Methanothermobacter thermautotrophicus</i> | -2.81 ± 0.05 | -3.23 ± 0.06 | -3.71 ± 0.06 | -3.95 ± 0.07 | -4.16 ± 0.07 | -4.28 ± 0.07 | -4.23 ± 0.07 | -4.15 ± 0.07 | -4.25 ± 0.07 | -4.31 ± 0.07 | -4.45 ± 0.07 | -4.27 ± 0.07 | -4.28 ± 0.07 |
| Archaea  | <i>Nanoarchaeum equitans</i>                  | -2.10 ± 0.09 | -1.82 ± 0.08 | -1.87 ± 0.09 | -1.88 ± 0.10 | -1.86 ± 0.09 | -1.77 ± 0.09 | -1.77 ± 0.09 | -1.78 ± 0.08 | -1.85 ± 0.08 | -1.91 ± 0.09 | -1.83 ± 0.08 | -1.96 ± 0.09 | -1.98 ± 0.09 |
| Archaea  | <i>Natronomonas pharaonis</i>                 | -5.15 ± 0.05 | -6.17 ± 0.06 | -6.85 ± 0.07 | -7.06 ± 0.07 | -7.08 ± 0.07 | -7.10 ± 0.07 | -7.07 ± 0.07 | -7.05 ± 0.07 | -6.96 ± 0.07 | -6.82 ± 0.07 | -6.90 ± 0.06 | -6.89 ± 0.06 | -6.77 ± 0.07 |
| Archaea  | <i>Nitrosopumilus maritimus</i>               | -1.91 ± 0.04 | -2.02 ± 0.05 | -2.38 ± 0.05 | -2.47 ± 0.05 | -2.37 ± 0.05 | -2.37 ± 0.05 | -2.26 ± 0.05 | -2.25 ± 0.05 | -2.19 ± 0.05 | -2.27 ± 0.05 | -2.24 ± 0.05 | -2.18 ± 0.05 | -2.32 ± 0.05 |
| Archaea  | <i>Picrophilus torridus</i>                   | -2.03 ± 0.05 | -2.26 ± 0.05 | -2.60 ± 0.06 | -2.66 ± 0.06 | -2.64 ± 0.06 | -2.76 ± 0.06 | -2.64 ± 0.06 | -2.61 ± 0.06 | -2.68 ± 0.06 | -2.65 ± 0.06 | -2.67 ± 0.06 | -2.62 ± 0.06 | -2.67 ± 0.06 |
| Archaea  | <i>Pyrobaculum aerophilum</i>                 | -3.85 ± 0.05 | -4.12 ± 0.06 | -4.50 ± 0.06 | -4.56 ± 0.06 | -4.49 ± 0.06 | -4.48 ± 0.06 | -4.46 ± 0.06 | -4.60 ± 0.06 | -4.63 ± 0.06 | -4.65 ± 0.06 | -4.67 ± 0.06 | -4.65 ± 0.06 | -4.61 ± 0.06 |
| Archaea  | <i>Pyrococcus abyssi</i>                      | -2.99 ± 0.06 | -3.05 ± 0.06 | -3.24 ± 0.06 | -3.30 ± 0.06 | -3.23 ± 0.06 | -3.29 ± 0.06 | -3.38 ± 0.06 | -3.40 ± 0.06 | -3.38 ± 0.06 | -3.45 ± 0.06 | -3.30 ± 0.06 | -3.37 ± 0.06 | -3.36 ± 0.06 |
| Archaea  | <i>Staphylothermus marinus</i>                | -2.19 ± 0.05 | -2.09 ± 0.05 | -2.21 ± 0.05 | -2.37 ± 0.06 | -2.33 ± 0.05 | -2.30 ± 0.05 | -2.32 ± 0.05 | -2.26 ± 0.05 | -2.36 ± 0.05 | -2.24 ± 0.05 | -2.32 ± 0.05 | -2.47 ± 0.05 | -2.38 ± 0.05 |
| Archaea  | <i>Sulfolobus acidocaldarius</i>              | -2.09 ± 0.04 | -2.15 ± 0.04 | -2.17 ± 0.04 | -2.33 ± 0.05 | -2.27 ± 0.05 | -2.41 ± 0.05 | -2.31 ± 0.04 | -2.25 ± 0.04 | -2.36 ± 0.05 | -2.44 ± 0.05 | -2.35 ± 0.05 | -2.42 ± 0.05 | -2.39 ± 0.05 |
| Archaea  | <i>Thermococcus gammatolerans</i>             | -3.95 ± 0.05 | -4.13 ± 0.06 | -4.38 ± 0.06 | -4.55 ± 0.06 | -4.76 ± 0.06 | -4.91 ± 0.06 | -4.80 ± 0.06 | -4.73 ± 0.06 | -4.74 ± 0.06 | -4.69 ± 0.06 | -4.74 ± 0.06 | -4.70 ± 0.06 | -4.55 ± 0.06 |
| Archaea  | <i>Thermoflum peudens</i>                     | -4.74 ± 0.07 | -4.94 ± 0.07 | -5.33 ± 0.07 | -5.36 ± 0.07 | -5.46 ± 0.07 | -5.39 ± 0.07 | -5.37 ± 0.07 | -5.52 ± 0.07 | -5.49 ± 0.07 | -5.47 ± 0.07 | -5.62 ± 0.07 | -5.62 ± 0.07 | -5.46 ± 0.07 |
| Archaea  | <i>Thermoplasma acidophilum</i>               | -2.95 ± 0.06 | -3.21 ± 0.06 | -3.62 ± 0.07 | -3.61 ± 0.07 | -3.75 ± 0.07 | -3.69 ± 0.07 | -3.63 ± 0.07 | -3.62 ± 0.07 | -3.78 ± 0.07 | -3.77 ± 0.07 | -3.80 ± 0.07 | -3.71 ± 0.07 | -3.76 ± 0.07 |
| Archaea  | <i>Thermoproteus neutrophilus</i>             | -5.11 ± 0.07 | -5.51 ± 0.07 | -5.95 ± 0.08 | -5.89 ± 0.08 | -5.92 ± 0.08 | -5.88 ± 0.07 | -5.93 ± 0.07 | -6.07 ± 0.08 | -6.13 ± 0.08 | -5.94 ± 0.08 | -6.02 ± 0.07 | -6.01 ± 0.07 | -6.00 ± 0.08 |

Continued on next page



| Type   | Species                          | Window 1     | Window 2     | Window 3     | Window 4     | Window 5     | Window 6     | Window 7     | Window 8     | Window 9     | Window 10    | Window 11    | Window 12    | Window 13    |
|--------|----------------------------------|--------------|--------------|--------------|--------------|--------------|--------------|--------------|--------------|--------------|--------------|--------------|--------------|--------------|
| Fungi  | <i>Aspergillus fumigatus</i>     | -3.77 ± 0.03 | -4.11 ± 0.03 | -4.69 ± 0.03 | -4.55 ± 0.03 | -4.22 ± 0.03 | -4.04 ± 0.03 | -3.92 ± 0.03 | -3.85 ± 0.03 | -3.97 ± 0.03 | -3.99 ± 0.03 | -3.94 ± 0.03 | -3.97 ± 0.03 | -3.98 ± 0.03 |
| Fungi  | <i>Candida dubliniensis</i>      | -1.65 ± 0.02 | -1.77 ± 0.02 | -2.29 ± 0.03 | -2.30 ± 0.03 | -2.16 ± 0.03 | -2.10 ± 0.03 | -2.05 ± 0.03 | -2.01 ± 0.03 | -1.97 ± 0.03 | -1.96 ± 0.03 | -1.92 ± 0.03 | -1.97 ± 0.03 | -1.96 ± 0.03 |
| Fungi  | <i>Cryptococcus neoformans</i>   | -3.01 ± 0.03 | -3.11 ± 0.03 | -3.57 ± 0.04 | -3.67 ± 0.04 | -3.53 ± 0.04 | -3.42 ± 0.04 | -3.43 ± 0.03 | -3.41 ± 0.03 | -3.42 ± 0.03 | -3.46 ± 0.03 | -3.46 ± 0.03 | -3.50 ± 0.03 | -3.51 ± 0.03 |
| Fungi  | <i>Debaryomyces hansenii</i>     | -2.12 ± 0.03 | -2.32 ± 0.03 | -2.86 ± 0.03 | -2.90 ± 0.03 | -2.79 ± 0.03 | -2.62 ± 0.03 | -2.55 ± 0.03 | -2.47 ± 0.03 | -2.44 ± 0.03 | -2.38 ± 0.03 | -2.36 ± 0.03 | -2.39 ± 0.03 | -2.38 ± 0.03 |
| Fungi  | <i>Encephalitozoon cuniculi</i>  | -3.02 ± 0.05 | -3.21 ± 0.06 | -3.44 ± 0.06 | -3.53 ± 0.05 | -3.57 ± 0.06 | -3.80 ± 0.06 | -3.76 ± 0.06 | -3.69 ± 0.06 | -3.74 ± 0.06 | -3.61 ± 0.05 | -3.69 ± 0.06 | -3.61 ± 0.06 | -3.59 ± 0.06 |
| Fungi  | <i>Eremothecium gossypii</i>     | -3.69 ± 0.04 | -4.33 ± 0.04 | -4.98 ± 0.05 | -5.35 ± 0.05 | -5.29 ± 0.05 | -5.28 ± 0.05 | -5.13 ± 0.05 | -5.17 ± 0.05 | -5.18 ± 0.05 | -5.12 ± 0.05 | -5.11 ± 0.05 | -5.23 ± 0.05 | -5.18 ± 0.05 |
| Fungi  | <i>Kluyveromyces lactis</i>      | -2.49 ± 0.03 | -2.90 ± 0.03 | -3.39 ± 0.03 | -3.47 ± 0.04 | -3.22 ± 0.03 | -3.04 ± 0.03 | -2.92 ± 0.03 | -2.83 ± 0.03 | -2.76 ± 0.03 | -2.80 ± 0.03 | -2.75 ± 0.03 | -2.79 ± 0.03 | -2.85 ± 0.03 |
| Fungi  | <i>Pichia stipitis</i>           | -2.73 ± 0.03 | -3.18 ± 0.03 | -3.89 ± 0.04 | -3.91 ± 0.04 | -3.69 ± 0.04 | -3.52 ± 0.04 | -3.34 ± 0.04 | -3.14 ± 0.03 | -3.10 ± 0.03 | -3.03 ± 0.03 | -2.91 ± 0.03 | -2.94 ± 0.03 | -2.98 ± 0.03 |
| Fungi  | <i>Saccharomyces cerevisiae</i>  | -2.31 ± 0.02 | -2.43 ± 0.03 | -2.90 ± 0.03 | -3.01 ± 0.03 | -2.96 ± 0.03 | -2.85 ± 0.03 | -2.75 ± 0.03 | -2.71 ± 0.03 | -2.69 ± 0.03 | -2.67 ± 0.03 | -2.66 ± 0.03 | -2.67 ± 0.03 | -2.72 ± 0.03 |
| Fungi  | <i>Schizosaccharomyces pombe</i> | -2.53 ± 0.03 | -2.51 ± 0.03 | -2.89 ± 0.03 | -3.01 ± 0.04 | -2.87 ± 0.03 | -2.84 ± 0.03 | -2.79 ± 0.03 | -2.67 ± 0.03 | -2.73 ± 0.03 | -2.70 ± 0.03 | -2.68 ± 0.03 | -2.69 ± 0.03 | -2.64 ± 0.03 |
| Fungi  | <i>Yarrowia lipolytica</i>       | -3.03 ± 0.03 | -3.75 ± 0.03 | -4.78 ± 0.04 | -5.02 ± 0.04 | -4.75 ± 0.04 | -4.63 ± 0.04 | -4.46 ± 0.04 | -4.32 ± 0.04 | -4.26 ± 0.04 | -4.25 ± 0.04 | -4.23 ± 0.04 | -4.26 ± 0.03 | -4.25 ± 0.03 |
| Plant  | <i>Arabidopsis thaliana</i>      | -3.12 ± 0.01 | -2.90 ± 0.01 | -3.04 ± 0.02 | -3.07 ± 0.02 | -3.06 ± 0.02 | -3.06 ± 0.02 | -3.04 ± 0.01 | -3.01 ± 0.01 | -3.06 ± 0.01 | -3.07 ± 0.01 | -3.07 ± 0.01 | -3.10 ± 0.01 | -3.10 ± 0.01 |
| Plant  | <i>Oryza sativa</i>              | -5.98 ± 0.02 | -6.05 ± 0.03 | -6.32 ± 0.03 | -6.38 ± 0.03 | -6.42 ± 0.03 | -6.40 ± 0.03 | -6.28 ± 0.03 | -6.21 ± 0.03 | -6.15 ± 0.03 | -6.08 ± 0.03 | -6.06 ± 0.03 | -6.03 ± 0.03 | -6.00 ± 0.03 |
| Insect | <i>Anopheles gambiae</i>         | -3.89 ± 0.03 | -4.34 ± 0.03 | -5.00 ± 0.03 | -5.17 ± 0.03 | -5.01 ± 0.03 | -4.88 ± 0.03 | -4.75 ± 0.03 | -4.72 ± 0.03 | -4.80 ± 0.03 | -4.70 ± 0.03 | -4.69 ± 0.03 | -4.78 ± 0.03 | -4.78 ± 0.03 |
| Insect | <i>Drosophila melanogaster</i>   | -3.76 ± 0.02 | -4.17 ± 0.02 | -4.88 ± 0.03 | -5.02 ± 0.03 | -4.84 ± 0.03 | -4.70 ± 0.03 | -4.63 ± 0.03 | -4.61 ± 0.03 | -4.59 ± 0.02 | -4.55 ± 0.03 | -4.56 ± 0.02 | -4.58 ± 0.02 | -4.56 ± 0.02 |
| Fish   | <i>Danio rerio</i>               | -3.86 ± 0.02 | -3.89 ± 0.02 | -4.28 ± 0.02 | -4.30 ± 0.02 | -4.13 ± 0.02 | -4.08 ± 0.02 | -3.99 ± 0.02 | -4.00 ± 0.02 | -3.95 ± 0.02 | -3.98 ± 0.02 | -3.98 ± 0.02 | -3.98 ± 0.02 | -3.95 ± 0.02 |
| Fish   | <i>Gasterosteus aculeatus</i>    | -4.63 ± 0.03 | -4.87 ± 0.03 | -5.16 ± 0.03 | -5.22 ± 0.03 | -5.08 ± 0.03 | -5.08 ± 0.03 | -4.99 ± 0.03 | -4.99 ± 0.03 | -4.98 ± 0.03 | -4.91 ± 0.03 | -5.00 ± 0.03 | -5.03 ± 0.03 | -5.01 ± 0.03 |
| Fish   | <i>Oryzias latipes</i>           | -4.30 ± 0.03 | -4.42 ± 0.03 | -4.75 ± 0.03 | -4.77 ± 0.03 | -4.65 ± 0.03 | -4.61 ± 0.03 | -4.51 ± 0.03 | -4.55 ± 0.03 | -4.56 ± 0.03 | -4.56 ± 0.03 | -4.56 ± 0.03 | -4.58 ± 0.03 | -4.55 ± 0.03 |
| Fish   | <i>Takifugu rubripes</i>         | -4.28 ± 0.03 | -4.43 ± 0.03 | -4.81 ± 0.03 | -4.84 ± 0.03 | -4.70 ± 0.03 | -4.66 ± 0.03 | -4.58 ± 0.03 | -4.59 ± 0.03 | -4.57 ± 0.03 | -4.54 ± 0.03 | -4.54 ± 0.03 | -4.63 ± 0.03 | -4.62 ± 0.03 |
| Bird   | <i>Gallus gallus</i>             | -5.25 ± 0.04 | -5.38 ± 0.04 | -5.53 ± 0.04 | -5.50 ± 0.04 | -5.33 ± 0.04 | -5.32 ± 0.04 | -5.13 ± 0.04 | -4.89 ± 0.04 | -4.92 ± 0.04 | -4.79 ± 0.04 | -4.84 ± 0.04 | -4.76 ± 0.04 | -4.63 ± 0.03 |
| Bird   | <i>Taeniopygia guttata</i>       | -5.05 ± 0.05 | -5.17 ± 0.05 | -5.37 ± 0.05 | -5.37 ± 0.05 | -5.24 ± 0.05 | -5.13 ± 0.05 | -5.04 ± 0.05 | -4.86 ± 0.05 | -4.78 ± 0.05 | -4.69 ± 0.04 | -4.68 ± 0.05 | -4.76 ± 0.05 | -4.67 ± 0.05 |
| Mammal | <i>Bos taurus</i>                | -5.33 ± 0.03 | -5.45 ± 0.03 | -5.76 ± 0.03 | -5.76 ± 0.03 | -5.62 ± 0.03 | -5.47 ± 0.03 | -5.27 ± 0.03 | -5.10 ± 0.03 | -5.12 ± 0.03 | -4.96 ± 0.03 | -5.03 ± 0.03 | -5.01 ± 0.03 | -4.92 ± 0.03 |
| Mammal | <i>Canis familiaris</i>          | -5.38 ± 0.03 | -5.50 ± 0.04 | -5.78 ± 0.04 | -5.75 ± 0.04 | -5.67 ± 0.04 | -5.44 ± 0.04 | -5.27 ± 0.03 | -5.13 ± 0.03 | -5.12 ± 0.03 | -4.96 ± 0.03 | -4.96 ± 0.03 | -4.94 ± 0.03 | -4.87 ± 0.03 |
| Mammal | <i>Equus caballus</i>            | -4.99 ± 0.03 | -5.02 ± 0.03 | -5.32 ± 0.03 | -5.27 ± 0.03 | -5.21 ± 0.03 | -5.04 ± 0.03 | -4.88 ± 0.03 | -4.69 ± 0.03 | -4.66 ± 0.03 | -4.60 ± 0.03 | -4.66 ± 0.03 | -4.71 ± 0.03 | -4.61 ± 0.03 |
| Mammal | <i>Homo sapiens</i>              | -5.38 ± 0.02 | -5.51 ± 0.03 | -5.67 ± 0.03 | -5.61 ± 0.03 | -5.54 ± 0.03 | -5.48 ± 0.02 | -5.29 ± 0.02 | -5.17 ± 0.02 | -5.12 ± 0.02 | -5.01 ± 0.02 | -5.03 ± 0.02 | -5.00 ± 0.02 | -4.96 ± 0.02 |
| Mammal | <i>Loxodonta africana</i>        | -4.93 ± 0.06 | -5.03 ± 0.06 | -5.51 ± 0.06 | -5.53 ± 0.06 | -5.41 ± 0.06 | -5.22 ± 0.06 | -5.06 ± 0.06 | -4.83 ± 0.06 | -4.73 ± 0.06 | -4.68 ± 0.06 | -4.80 ± 0.06 | -4.89 ± 0.06 | -4.69 ± 0.06 |
| Mammal | <i>Mus musculus</i>              | -5.04 ± 0.02 | -5.09 ± 0.02 | -5.35 ± 0.02 | -5.30 ± 0.02 | -5.22 ± 0.02 | -5.10 ± 0.02 | -4.93 ± 0.02 | -4.76 ± 0.02 | -4.74 ± 0.02 | -4.64 ± 0.02 | -4.67 ± 0.02 | -4.68 ± 0.02 | -4.62 ± 0.02 |
| Mammal | <i>Pteropus vampyrus</i>         | -5.49 ± 0.04 | -5.63 ± 0.04 | -5.86 ± 0.04 | -5.81 ± 0.04 | -5.66 ± 0.04 | -5.57 ± 0.04 | -5.41 ± 0.04 | -5.29 ± 0.04 | -5.21 ± 0.04 | -5.09 ± 0.04 | -5.05 ± 0.04 | -5.05 ± 0.04 | -4.99 ± 0.04 |
| Mammal | <i>Tursiops truncatus</i>        | -5.52 ± 0.04 | -5.68 ± 0.04 | -5.87 ± 0.04 | -5.86 ± 0.04 | -5.78 ± 0.04 | -5.65 ± 0.04 | -5.41 ± 0.04 | -5.33 ± 0.04 | -5.29 ± 0.04 | -5.14 ± 0.04 | -5.11 ± 0.04 | -5.10 ± 0.04 | -5.05 ± 0.04 |
