# Supplementary material for: A Universal Trend of Reduced mRNA Stability near the Translation-Initiation Site in Prokaryotes and Eukaryotes
Source: PubMed Central journal article supplement (PMC2816680; doi:10.1371/journal.pcbi.1000664), 2010-02-05
Supplement: pcbi.1000664.s003.pdf [file pcbi.1000664.s003.pdf]

Table S3: Intra-genome comparison on mean  $Z_{\Delta G}$  of the first window

| Type     | Species                                     | GC         |           |                       | ENC        |           |                       |
|----------|---------------------------------------------|------------|-----------|-----------------------|------------|-----------|-----------------------|
|          |                                             | Highest 5% | Lowest 5% | P-value               | Highest 5% | Lowest 5% | P-value               |
| Bacteria | <i>Acaerochloris marina</i>                 | 0.37       | 0.03      | $1.0 \times 10^{-5}$  | 0.21       | 0.09      | $1.5 \times 10^{-1}$  |
| Bacteria | <i>Acholeplasma laidlawii</i>               | -0.02      | 0.09      | $4.6 \times 10^{-1}$  | 0.02       | 0.29      | $9.6 \times 10^{-2}$  |
| Bacteria | <i>Acidiphilium cryptum</i>                 | 0.48       | 0.09      | $2.8 \times 10^{-3}$  | 0.02       | 0.45      | $1.0 \times 10^{-3}$  |
| Bacteria | <i>Acidithiobacillus ferrooxidans</i>       | 0.29       | 0.11      | $1.0 \times 10^{-1}$  | 0.30       | 0.57      | $1.5 \times 10^{-2}$  |
| Bacteria | <i>Acidobacteria bacterium</i>              | 0.44       | 0.27      | $6.7 \times 10^{-2}$  | 0.29       | 0.42      | $1.5 \times 10^{-1}$  |
| Bacteria | <i>Acidobacterium capsulatum</i>            | 0.73       | 0.14      | $4.1 \times 10^{-7}$  | 0.18       | 0.40      | $7.3 \times 10^{-2}$  |
| Bacteria | <i>Acidothermus cellulolyticus</i>          | 0.26       | 0.12      | $3.1 \times 10^{-1}$  | 0.22       | 0.15      | $6.4 \times 10^{-1}$  |
| Bacteria | <i>Acidovorax citrulli</i>                  | 0.69       | 0.21      | $2.2 \times 10^{-7}$  | 0.22       | 1.00      | $2.7 \times 10^{-14}$ |
| Bacteria | <i>Acinetobacter baumannii</i>              | 0.22       | 0.02      | $3.6 \times 10^{-2}$  | 0.07       | 0.07      | $9.6 \times 10^{-1}$  |
| Bacteria | <i>Actinobacillus pleuropneumoniae</i>      | 0.33       | -0.06     | $3.9 \times 10^{-3}$  | 0.14       | 0.17      | $8.3 \times 10^{-1}$  |
| Bacteria | <i>Aeromonas hydrophila</i>                 | 0.68       | 0.36      | $2.2 \times 10^{-3}$  | 0.31       | 0.66      | $1.1 \times 10^{-3}$  |
| Bacteria | <i>Agrobacterium radiobacter</i>            | 0.72       | 0.16      | $3.1 \times 10^{-11}$ | 0.28       | 0.67      | $4.1 \times 10^{-6}$  |
| Bacteria | <i>Akkermansia muciniphila</i>              | 0.57       | 0.18      | $2.4 \times 10^{-3}$  | 0.25       | 0.74      | $9.9 \times 10^{-5}$  |
| Bacteria | <i>Alcalivorax borkumensis</i>              | 0.44       | 0.22      | $5.6 \times 10^{-2}$  | 0.37       | 0.44      | $5.2 \times 10^{-1}$  |
| Bacteria | <i>Aliivibrio salmonicida</i>               | 0.25       | -0.13     | $1.3 \times 10^{-4}$  | 0.67       | 0.23      | $9.1 \times 10^{-5}$  |
| Bacteria | <i>Alkalicoccus ehrlichii</i>               | 0.54       | 0.30      | $4.1 \times 10^{-2}$  | 0.29       | 0.58      | $1.8 \times 10^{-2}$  |
| Bacteria | <i>Alkaliphilus metallireducens</i>         | 0.18       | -0.06     | $9.5 \times 10^{-3}$  | 0.22       | 0.21      | $9.6 \times 10^{-1}$  |
| Bacteria | <i>Alteromonas macleodii</i>                | 0.20       | 0.13      | $4.3 \times 10^{-1}$  | 0.21       | 0.25      | $7.3 \times 10^{-1}$  |
| Bacteria | <i>Anabaena variabilis</i>                  | 0.17       | -0.01     | $3.5 \times 10^{-2}$  | 0.07       | 0.14      | $4.6 \times 10^{-1}$  |
| Bacteria | <i>Anaerocellum thermophilum</i>            | 0.08       | -0.05     | $2.4 \times 10^{-1}$  | 0.09       | 0.18      | $4.5 \times 10^{-1}$  |
| Bacteria | <i>Anaeromyxobacter dehalogenans</i>        | 0.69       | 0.49      | $4.5 \times 10^{-2}$  | 0.39       | 0.74      | $2.8 \times 10^{-4}$  |
| Bacteria | <i>Anaplasma marginale</i>                  | 0.09       | -0.13     | $3.3 \times 10^{-1}$  | 0.09       | 0.16      | $7.3 \times 10^{-1}$  |
| Bacteria | <i>Anoxybacillus flavithermus</i>           | 0.09       | -0.14     | $6.3 \times 10^{-2}$  | -0.07      | 0.00      | $5.5 \times 10^{-1}$  |
| Bacteria | <i>Aquifex aeolicus</i>                     | 0.29       | -0.28     | $8.4 \times 10^{-4}$  | 0.03       | 0.09      | $6.8 \times 10^{-1}$  |
| Bacteria | <i>Archaeoglobus fulgidus</i>               | 0.26       | -0.04     | $2.0 \times 10^{-2}$  | -0.03      | -0.02     | $9.7 \times 10^{-1}$  |
| Bacteria | <i>Arco bacter butzleri</i>                 | 0.04       | 0.08      | $7.5 \times 10^{-1}$  | -0.03      | 0.26      | $1.8 \times 10^{-2}$  |
| Bacteria | <i>Aromatoleum aromaticum</i>               | 0.63       | 0.12      | $1.8 \times 10^{-6}$  | -0.10      | 0.70      | $9.9 \times 10^{-14}$ |
| Bacteria | <i>Arthrobacter aurescens</i>               | 0.30       | 0.09      | $3.8 \times 10^{-2}$  | 0.26       | 0.28      | $8.5 \times 10^{-1}$  |
| Bacteria | <i>Aster yellows</i>                        | -0.03      | -0.26     | $3.2 \times 10^{-1}$  | -0.07      | 0.16      | $3.0 \times 10^{-1}$  |
| Bacteria | <i>Azoarcus sp. BH72</i>                    | 0.72       | 0.32      | $1.8 \times 10^{-4}$  | 0.21       | 0.91      | $9.7 \times 10^{-11}$ |
| Bacteria | <i>Azorhizobium caulinodans</i>             | 0.49       | 0.30      | $4.7 \times 10^{-2}$  | 0.22       | 0.54      | $1.8 \times 10^{-3}$  |
| Bacteria | <i>Azotobacter vinelandii</i>               | 0.67       | 0.08      | $2.4 \times 10^{-9}$  | -0.13      | 0.69      | $1.0 \times 10^{-16}$ |
| Bacteria | <i>Bacillus amyloliquefaciens</i>           | 0.29       | 0.12      | $5.6 \times 10^{-2}$  | 0.24       | 0.31      | $5.2 \times 10^{-1}$  |
| Bacteria | <i>Bacteroides fragilis</i>                 | 0.69       | 0.08      | $5.5 \times 10^{-11}$ | 0.39       | 0.24      | $1.2 \times 10^{-1}$  |
| Bacteria | <i>Bartonella bacilliformis</i>             | 0.06       | -0.08     | $4.6 \times 10^{-1}$  | 0.16       | 0.06      | $5.6 \times 10^{-1}$  |
| Bacteria | <i>Baumannia cicadellinicola</i>            | 0.24       | -0.18     | $8.6 \times 10^{-2}$  | 0.06       | 0.02      | $8.4 \times 10^{-1}$  |
| Bacteria | <i>Bdellovibrio bacteriovorus</i>           | 0.46       | 0.24      | $3.9 \times 10^{-2}$  | 0.30       | 0.30      | 1                     |
| Bacteria | <i>Beijerinckia indica</i>                  | 0.47       | 0.11      | $8.9 \times 10^{-4}$  | 0.18       | 0.55      | $2.6 \times 10^{-4}$  |
| Bacteria | <i>Beutenbergia cavernae</i>                | 0.33       | 0.38      | $6.2 \times 10^{-1}$  | 0.30       | 0.61      | $3.6 \times 10^{-3}$  |
| Bacteria | <i>Bifidobacterium adolescentis</i>         | 0.35       | 0.23      | $4.8 \times 10^{-1}$  | 0.16       | 0.52      | $4.5 \times 10^{-2}$  |
| Bacteria | <i>Bordetella avium</i>                     | 0.62       | 0.39      | $3.8 \times 10^{-2}$  | 0.35       | 0.65      | $7.6 \times 10^{-3}$  |
| Bacteria | <i>Borrelia afzelii</i>                     | 0.10       | -0.02     | $6.3 \times 10^{-1}$  | -0.31      | -0.05     | $2.6 \times 10^{-1}$  |
| Bacteria | <i>Brachyspira hyodysenteriae</i>           | -0.04      | 0.07      | $3.9 \times 10^{-1}$  | 0.23       | 0.17      | $5.6 \times 10^{-1}$  |
| Bacteria | <i>Bradyrhizobium japonicum</i>             | 0.62       | 0.01      | $4.9 \times 10^{-16}$ | 0.04       | 0.72      | $1.7 \times 10^{-19}$ |
| Bacteria | <i>Brevibacillus brevis</i>                 | 0.24       | 0.07      | $3.7 \times 10^{-2}$  | 0.12       | 0.09      | $6.9 \times 10^{-1}$  |
| Bacteria | <i>Brucella abortus</i>                     | 0.57       | 0.03      | $2.7 \times 10^{-6}$  | -0.06      | 0.57      | $8.3 \times 10^{-7}$  |
| Bacteria | <i>Buchnera aphidicola</i>                  | 0.07       | -0.05     | $5.9 \times 10^{-1}$  | 0.11       | -0.16     | $2.9 \times 10^{-1}$  |
| Bacteria | <i>Burkholderia ambifaria</i>               | 0.83       | 0.36      | $1.5 \times 10^{-8}$  | 0.18       | 1.12      | $3.2 \times 10^{-25}$ |
| Bacteria | <i>Caldicellulosiruptor saccharolyticus</i> | 0.15       | 0.03      | $3.1 \times 10^{-1}$  | 0.12       | -0.06     | $1.7 \times 10^{-1}$  |
| Bacteria | <i>Campylobacter concisus</i>               | 0.42       | 0.10      | $1.7 \times 10^{-2}$  | 0.12       | 0.14      | $9.2 \times 10^{-1}$  |
| Bacteria | <i>Candidatus Amoebophilus</i>              | 0.12       | 0.25      | $4.1 \times 10^{-1}$  | 0.07       | 0.08      | $9.5 \times 10^{-1}$  |
| Bacteria | <i>Carboxydotherrmus hydrogenoformans</i>   | 0.21       | -0.05     | $6.6 \times 10^{-2}$  | 0.04       | -0.03     | $5.7 \times 10^{-1}$  |
| Bacteria | <i>Caulobacter crescentus</i>               | 0.64       | 0.12      | $6.2 \times 10^{-6}$  | -0.13      | 0.78      | $5.3 \times 10^{-14}$ |
| Bacteria | <i>Cellvibrio japonicus</i>                 | 0.62       | 0.01      | $2.4 \times 10^{-8}$  | 0.04       | 0.54      | $4.7 \times 10^{-6}$  |
| Bacteria | <i>Chlamydia muridarum</i>                  | 0.07       | -0.02     | $6.8 \times 10^{-1}$  | 0.16       | -0.02     | $3.9 \times 10^{-1}$  |
| Bacteria | <i>Chlamydophila abortus</i>                | 0.10       | 0.04      | $7.6 \times 10^{-1}$  | -0.13      | 0.04      | $3.9 \times 10^{-1}$  |
| Bacteria | <i>Chlorobaculum parvum</i>                 | 0.51       | 0.15      | $7.8 \times 10^{-3}$  | 0.30       | 0.69      | $2.4 \times 10^{-3}$  |
| Bacteria | <i>Chlorobium chlorochromatii</i>           | 0.23       | 0.06      | $2.7 \times 10^{-1}$  | 0.32       | 0.26      | $5.9 \times 10^{-1}$  |
| Bacteria | <i>Chloroflexus aggregans</i>               | 0.24       | 0.17      | $4.9 \times 10^{-1}$  | 0.24       | 0.25      | $9.0 \times 10^{-1}$  |
| Bacteria | <i>Chloroherpeton thalassium</i>            | 0.52       | 0.11      | $3.1 \times 10^{-4}$  | 0.25       | 0.26      | $9.1 \times 10^{-1}$  |
| Bacteria | <i>Chromobacterium violaceum</i>            | 0.53       | -0.03     | $2.1 \times 10^{-7}$  | 0.04       | 0.85      | $9.9 \times 10^{-13}$ |
| Bacteria | <i>Chromohalobacter salexigens</i>          | 0.51       | 0.15      | $5.4 \times 10^{-4}$  | 0.19       | 0.62      | $2.3 \times 10^{-5}$  |
| Bacteria | <i>Citrobacter koseri</i>                   | 0.41       | -0.16     | $1.1 \times 10^{-8}$  | 0.16       | 0.38      | $3.0 \times 10^{-2}$  |
| Bacteria | <i>Clavibacter michiganensis</i>            | 0.65       | 0.36      | $1.6 \times 10^{-2}$  | 0.44       | 0.63      | $1.0 \times 10^{-1}$  |
| Bacteria | <i>Clostridium acetobutylicum</i>           | 0.12       | -0.04     | $1.2 \times 10^{-1}$  | 0.12       | 0.17      | $5.8 \times 10^{-1}$  |
| Bacteria | <i>Colwellia psychrerythraea</i>            | 0.22       | 0.12      | $2.7 \times 10^{-1}$  | 0.10       | 0.09      | $9.4 \times 10^{-1}$  |
| Bacteria | <i>Coprothermobacter proteolyticus</i>      | 0.09       | -0.06     | $3.8 \times 10^{-1}$  | 0.19       | -0.01     | $2.5 \times 10^{-1}$  |
| Bacteria | <i>Corynebacterium aurimucosum</i>          | 0.55       | -0.07     | $1.5 \times 10^{-6}$  | 0.05       | 0.62      | $6.9 \times 10^{-5}$  |
| Bacteria | <i>Coziella burnetii</i>                    | 0.01       | -0.02     | $8.1 \times 10^{-1}$  | 0.03       | 0.08      | $7.3 \times 10^{-1}$  |
| Bacteria | <i>Cronobacter sakazakii</i>                | 0.60       | 0.01      | $6.6 \times 10^{-9}$  | 0.27       | 0.44      | $9.4 \times 10^{-2}$  |
| Bacteria | <i>Cupriavidus taiwanensis</i>              | 0.80       | 0.28      | $1.1 \times 10^{-8}$  | 0.13       | 1.02      | $3.2 \times 10^{-18}$ |
| Bacteria | <i>Cyanthece sp. PCC 7424</i>               | 0.23       | 0.07      | $7.1 \times 10^{-2}$  | 0.31       | 0.07      | $5.1 \times 10^{-3}$  |

Continued on next page

| Type     | Species                                 | GC         |           |                       | ENC        |           |                       |
|----------|-----------------------------------------|------------|-----------|-----------------------|------------|-----------|-----------------------|
|          |                                         | Highest 5% | Lowest 5% | P-value               | Highest 5% | Lowest 5% | P-value               |
| Bacteria | <i>Cytophaga hutchinsonii</i>           | 0.34       | -0.06     | $1.5 \times 10^{-4}$  | 0.19       | 0.12      | $4.5 \times 10^{-1}$  |
| Bacteria | <i>Dechloromonas aromatica</i>          | 0.63       | 0.22      | $3.1 \times 10^{-5}$  | 0.21       | 0.79      | $9.0 \times 10^{-10}$ |
| Bacteria | <i>Dehalococcoides ethenogenes</i>      | 0.32       | 0.05      | $1.1 \times 10^{-1}$  | 0.19       | 0.27      | $6.5 \times 10^{-1}$  |
| Bacteria | <i>Deinococcus deserti</i>              | 0.45       | 0.31      | $2.4 \times 10^{-1}$  | 0.23       | 0.83      | $7.0 \times 10^{-6}$  |
| Bacteria | <i>Delftia acidovorans</i>              | 0.78       | 0.17      | $6.5 \times 10^{-12}$ | 0.11       | 0.98      | $3.3 \times 10^{-21}$ |
| Bacteria | <i>Desulfatibacillum alkenivorans</i>   | 0.66       | 0.24      | $9.1 \times 10^{-6}$  | 0.41       | 0.75      | $4.1 \times 10^{-5}$  |
| Bacteria | <i>Desulfotobacterium hafniense</i>     | 0.52       | 0.12      | $2.9 \times 10^{-6}$  | 0.17       | 0.22      | $5.5 \times 10^{-1}$  |
| Bacteria | <i>Desulfotobacterium autotrophicum</i> | 0.40       | 0.25      | $6.9 \times 10^{-2}$  | 0.24       | 0.16      | $3.1 \times 10^{-1}$  |
| Bacteria | <i>Desulfococcus oleovorans</i>         | 0.60       | 0.06      | $1.3 \times 10^{-6}$  | 0.09       | 0.58      | $4.8 \times 10^{-5}$  |
| Bacteria | <i>Desulfotalea psychrophila</i>        | 0.38       | 0.03      | $1.8 \times 10^{-3}$  | 0.16       | 0.48      | $5.0 \times 10^{-3}$  |
| Bacteria | <i>Desulfotomaculum reducens</i>        | 0.10       | 0.06      | $6.8 \times 10^{-1}$  | 0.08       | 0.00      | $4.4 \times 10^{-1}$  |
| Bacteria | <i>Desulfovibrio desulfuricans</i>      | 0.33       | 0.10      | $5.8 \times 10^{-2}$  | 0.05       | 0.46      | $1.8 \times 10^{-3}$  |
| Bacteria | <i>Diaphorobacter sp. TPSY</i>          | 0.78       | 0.52      | $1.2 \times 10^{-2}$  | 0.42       | 1.14      | $9.1 \times 10^{-10}$ |
| Bacteria | <i>Dichelobacter nodosus</i>            | 0.24       | 0.08      | $4.3 \times 10^{-1}$  | 0.12       | 0.08      | $8.4 \times 10^{-1}$  |
| Bacteria | <i>Dickeya dadantii</i>                 | 0.60       | 0.19      | $2.9 \times 10^{-5}$  | 0.19       | 0.53      | $1.7 \times 10^{-3}$  |
| Bacteria | <i>Dictyoglomus thermophilum</i>        | 0.21       | -0.24     | $1.9 \times 10^{-3}$  | 0.06       | -0.09     | $3.0 \times 10^{-1}$  |
| Bacteria | <i>Dinoroseobacter shibae</i>           | 0.65       | 0.43      | $4.4 \times 10^{-2}$  | 0.44       | 0.77      | $2.3 \times 10^{-3}$  |
| Bacteria | <i>Edwardsiella ictaluri</i>            | 0.58       | -0.08     | $5.1 \times 10^{-9}$  | 0.07       | 0.53      | $3.9 \times 10^{-5}$  |
| Bacteria | <i>Ehrlichia canis</i>                  | -0.30      | 0.03      | $1.8 \times 10^{-1}$  | 0.13       | -0.18     | $1.3 \times 10^{-1}$  |
| Bacteria | <i>Elusimicrobium minutum</i>           | 0.24       | 0.13      | $5.3 \times 10^{-1}$  | 0.37       | 0.28      | $5.4 \times 10^{-1}$  |
| Bacteria | <i>Enterobacter sp. 638</i>             | 0.53       | 0.11      | $9.9 \times 10^{-6}$  | 0.14       | 0.46      | $8.6 \times 10^{-4}$  |
| Bacteria | <i>Enterococcus faecalis</i>            | 0.13       | -0.05     | $1.3 \times 10^{-1}$  | 0.02       | 0.01      | $9.7 \times 10^{-1}$  |
| Bacteria | <i>Erwinia tasmaniensis</i>             | 0.44       | 0.05      | $4.6 \times 10^{-4}$  | 0.18       | 0.55      | $5.7 \times 10^{-4}$  |
| Bacteria | <i>Erythrobacter litoralis</i>          | 0.58       | 0.13      | $5.9 \times 10^{-5}$  | 0.23       | 0.63      | $3.5 \times 10^{-4}$  |
| Bacteria | <i>Escherichia coli</i>                 | 0.51       | 0.07      | $9.3 \times 10^{-6}$  | 0.18       | 0.39      | $2.9 \times 10^{-2}$  |
| Bacteria | <i>Eubacterium eligens</i>              | 0.26       | -0.06     | $4.7 \times 10^{-2}$  | 0.24       | 0.38      | $3.8 \times 10^{-1}$  |
| Bacteria | <i>Exiguobacterium sibiricum</i>        | 0.53       | 0.14      | $2.2 \times 10^{-4}$  | 0.32       | 0.24      | $5.1 \times 10^{-1}$  |
| Bacteria | <i>Fervidobacterium nodosum</i>         | 0.03       | 0.00      | $8.5 \times 10^{-1}$  | 0.17       | 0.02      | $3.0 \times 10^{-1}$  |
| Bacteria | <i>Finegoldia magna</i>                 | 0.36       | -0.08     | $1.5 \times 10^{-3}$  | 0.14       | -0.32     | $2.8 \times 10^{-1}$  |
| Bacteria | <i>Flavobacterium johnsoniae</i>        | 0.38       | 0.23      | $4.1 \times 10^{-2}$  | 0.26       | 0.23      | $7.1 \times 10^{-1}$  |
| Bacteria | <i>Francisella novicida</i>             | 0.29       | 0.01      | $4.6 \times 10^{-2}$  | 0.25       | 0.13      | $3.9 \times 10^{-1}$  |
| Bacteria | <i>Frankia alni</i>                     | 0.22       | 0.06      | $5.8 \times 10^{-2}$  | -0.14      | 0.18      | $2.2 \times 10^{-4}$  |
| Bacteria | <i>Fusobacterium nucleatum</i>          | 0.23       | -0.04     | $8.2 \times 10^{-2}$  | -0.25      | -0.10     | $3.9 \times 10^{-1}$  |
| Bacteria | <i>Gemmatimonas aurantiaca</i>          | 0.46       | 0.27      | $6.6 \times 10^{-2}$  | 0.07       | 0.52      | $1.1 \times 10^{-5}$  |
| Bacteria | <i>Geobacillus kaustophilus</i>         | 0.28       | 0.06      | $3.0 \times 10^{-2}$  | 0.06       | 0.31      | $2.3 \times 10^{-2}$  |
| Bacteria | <i>Geobacter bemidjensis</i>            | 0.54       | 0.24      | $4.2 \times 10^{-3}$  | 0.32       | 0.83      | $4.0 \times 10^{-8}$  |
| Bacteria | <i>Gloeobacter violaceus</i>            | 0.49       | 0.14      | $4.2 \times 10^{-4}$  | 0.27       | 0.62      | $7.1 \times 10^{-5}$  |
| Bacteria | <i>Gluconacetobacter diazotrophicus</i> | 0.63       | 0.30      | $1.6 \times 10^{-3}$  | 0.37       | 0.66      | $7.0 \times 10^{-3}$  |
| Bacteria | <i>Gluconobacter oxydans</i>            | 0.54       | 0.02      | $8.7 \times 10^{-5}$  | -0.05      | 0.51      | $7.2 \times 10^{-5}$  |
| Bacteria | <i>Gramella forsetii</i>                | 0.36       | 0.09      | $2.7 \times 10^{-3}$  | 0.36       | 0.20      | $7.7 \times 10^{-2}$  |
| Bacteria | <i>Granulibacter betshedensis</i>       | 0.33       | 0.04      | $3.9 \times 10^{-2}$  | 0.07       | 0.20      | $3.7 \times 10^{-1}$  |
| Bacteria | <i>Haemophilus ducreyi</i>              | 0.17       | -0.16     | $1.9 \times 10^{-1}$  | 0.04       | 0.24      | $2.3 \times 10^{-1}$  |
| Bacteria | <i>Hahella chejuensis</i>               | 0.54       | 0.05      | $1.8 \times 10^{-9}$  | 0.17       | 0.44      | $4.0 \times 10^{-4}$  |
| Bacteria | <i>Halorhodospira halophila</i>         | 0.43       | 0.32      | $4.1 \times 10^{-1}$  | 0.23       | 0.60      | $4.7 \times 10^{-3}$  |
| Bacteria | <i>Halothermothrix orenii</i>           | 0.15       | -0.08     | $8.7 \times 10^{-2}$  | 0.20       | 0.04      | $2.0 \times 10^{-1}$  |
| Bacteria | <i>Helicobacter acinonychis</i>         | 0.07       | 0.16      | $5.2 \times 10^{-1}$  | -0.08      | 0.10      | $2.0 \times 10^{-1}$  |
| Bacteria | <i>Heliobacterium modesticaldum</i>     | 0.43       | -0.11     | $1.1 \times 10^{-4}$  | 0.12       | 0.18      | $6.5 \times 10^{-1}$  |
| Bacteria | <i>Hermiimonas arsenicozydans</i>       | 0.58       | 0.13      | $3.4 \times 10^{-5}$  | 0.24       | 0.59      | $1.4 \times 10^{-3}$  |
| Bacteria | <i>Herpetosiphon aurantiacus</i>        | 0.39       | 0.06      | $3.9 \times 10^{-5}$  | 0.24       | 0.22      | $8.3 \times 10^{-1}$  |
| Bacteria | <i>Hydrogenobaculum sp. Y04AAS1</i>     | -0.11      | -0.08     | $8.7 \times 10^{-1}$  | -0.25      | -0.07     | $3.2 \times 10^{-1}$  |
| Bacteria | <i>Hyphomonas neptunium</i>             | 0.44       | 0.26      | $1.2 \times 10^{-1}$  | 0.21       | 0.58      | $1.3 \times 10^{-3}$  |
| Bacteria | <i>Idiomarina loihiensis</i>            | 0.24       | 0.09      | $2.0 \times 10^{-1}$  | 0.05       | 0.15      | $4.3 \times 10^{-1}$  |
| Bacteria | <i>Jannaschia sp. CCS1</i>              | 0.68       | 0.29      | $3.2 \times 10^{-5}$  | 0.36       | 0.69      | $8.6 \times 10^{-4}$  |
| Bacteria | <i>Janthinobacterium sp. Marseille</i>  | 0.54       | 0.23      | $2.3 \times 10^{-3}$  | 0.18       | 0.70      | $1.7 \times 10^{-6}$  |
| Bacteria | <i>Kneococcus radiotolerans</i>         | 0.40       | 0.21      | $7.2 \times 10^{-2}$  | 0.08       | 0.27      | $6.3 \times 10^{-2}$  |
| Bacteria | <i>Klebsiella pneumoniae</i>            | 0.72       | 0.12      | $2.3 \times 10^{-11}$ | 0.26       | 0.77      | $2.7 \times 10^{-8}$  |
| Bacteria | <i>Kocuria rhizophila</i>               | 0.34       | 0.33      | $9.5 \times 10^{-1}$  | 0.35       | 0.51      | $2.7 \times 10^{-1}$  |
| Bacteria | <i>Kosmotoga olearia</i>                | 0.17       | -0.06     | $9.1 \times 10^{-2}$  | 0.11       | -0.10     | $1.4 \times 10^{-1}$  |
| Bacteria | <i>Lactobacillus acidophilus</i>        | 0.14       | 0.05      | $4.8 \times 10^{-1}$  | 0.12       | 0.08      | $8.2 \times 10^{-1}$  |
| Bacteria | <i>Lactococcus lactis</i>               | 0.03       | 0.22      | $1.4 \times 10^{-1}$  | 0.23       | 0.10      | $3.2 \times 10^{-1}$  |
| Bacteria | <i>Laribacter hongkongensis</i>         | 0.67       | 0.03      | $3.6 \times 10^{-8}$  | 0.27       | 0.63      | $8.0 \times 10^{-4}$  |
| Bacteria | <i>Lawsonia intracellularis</i>         | 0.10       | -0.29     | $5.9 \times 10^{-2}$  | -0.12      | 0.06      | $3.6 \times 10^{-1}$  |
| Bacteria | <i>Legionella pneumophila</i>           | 0.21       | -0.04     | $2.4 \times 10^{-2}$  | 0.13       | 0.08      | $6.3 \times 10^{-1}$  |
| Bacteria | <i>Leifsonia zyli</i>                   | 0.37       | 0.09      | $4.8 \times 10^{-2}$  | 0.25       | 0.39      | $4.1 \times 10^{-1}$  |
| Bacteria | <i>Leptospira biflexa</i>               | 0.39       | 0.06      | $4.7 \times 10^{-4}$  | 0.07       | 0.04      | $7.2 \times 10^{-1}$  |
| Bacteria | <i>Leptothrix cholodnii</i>             | 0.82       | 0.48      | $6.5 \times 10^{-4}$  | 0.49       | 0.89      | $1.2 \times 10^{-4}$  |
| Bacteria | <i>Leuconostoc citreum</i>              | 0.11       | 0.16      | $7.2 \times 10^{-1}$  | 0.29       | -0.05     | $2.8 \times 10^{-2}$  |
| Bacteria | <i>Listeria innocua</i>                 | 0.15       | -0.08     | $1.1 \times 10^{-1}$  | 0.15       | 0.06      | $5.3 \times 10^{-1}$  |
| Bacteria | <i>Lysinibacillus sphaericus</i>        | 0.03       | 0.06      | $7.0 \times 10^{-1}$  | 0.14       | -0.04     | $9.2 \times 10^{-2}$  |
| Bacteria | <i>Macrococcus caseolyticus</i>         | 0.43       | 0.21      | $8.6 \times 10^{-2}$  | 0.26       | 0.18      | $4.6 \times 10^{-1}$  |
| Bacteria | <i>Magnetococcus sp. MC-1</i>           | 0.34       | -0.09     | $1.0 \times 10^{-4}$  | 0.10       | 0.26      | $1.3 \times 10^{-1}$  |
| Bacteria | <i>Magnetospirillum magneticum</i>      | 0.39       | 0.29      | $2.9 \times 10^{-1}$  | 0.18       | 0.61      | $7.7 \times 10^{-5}$  |
| Bacteria | <i>Mannheimia succiniciproducens</i>    | 0.37       | 0.04      | $1.2 \times 10^{-2}$  | 0.24       | 0.01      | $1.6 \times 10^{-1}$  |

Continued on next page

| Type     | Species                                  | GC         |           |                       | ENC        |           |                       |
|----------|------------------------------------------|------------|-----------|-----------------------|------------|-----------|-----------------------|
|          |                                          | Highest 5% | Lowest 5% | P-value               | Highest 5% | Lowest 5% | P-value               |
| Bacteria | <i>Maricaulis maris</i>                  | 0.46       | 0.42      | $7.3 \times 10^{-1}$  | 0.36       | 0.47      | $3.0 \times 10^{-1}$  |
| Bacteria | <i>Marinobacter aquaeolei</i>            | 0.57       | 0.15      | $3.4 \times 10^{-5}$  | 0.24       | 0.67      | $9.8 \times 10^{-6}$  |
| Bacteria | <i>Marinomonas</i> sp. MWYL1             | 0.33       | 0.20      | $1.3 \times 10^{-1}$  | 0.23       | 0.27      | $6.5 \times 10^{-1}$  |
| Bacteria | <i>Mesoplasma florum</i>                 | 0.42       | -0.12     | $2.7 \times 10^{-1}$  | -0.15      | 0.11      | $6.0 \times 10^{-1}$  |
| Bacteria | <i>Mesorhizobium loti</i>                | 0.54       | 0.06      | $3.8 \times 10^{-9}$  | 0.05       | 0.62      | $3.1 \times 10^{-11}$ |
| Bacteria | <i>Methylococcoides burtonii</i>         | 0.19       | -0.25     | $3.0 \times 10^{-3}$  | 0.18       | -0.09     | $6.1 \times 10^{-2}$  |
| Bacteria | <i>Methylobacterium chloromethanicum</i> | 0.56       | 0.21      | $3.9 \times 10^{-5}$  | 0.11       | 0.67      | $8.7 \times 10^{-10}$ |
| Bacteria | <i>Methylobacterium petrolicophilum</i>  | 0.61       | 0.39      | $4.3 \times 10^{-2}$  | 0.25       | 0.83      | $5.3 \times 10^{-7}$  |
| Bacteria | <i>Methylobacillus flagellatus</i>       | 0.65       | 0.14      | $2.8 \times 10^{-5}$  | 0.26       | 0.63      | $3.7 \times 10^{-3}$  |
| Bacteria | <i>Methylobacterium chloromethanicum</i> | 0.56       | 0.21      | $3.9 \times 10^{-5}$  | 0.11       | 0.67      | $8.7 \times 10^{-10}$ |
| Bacteria | <i>Methylocella silvestris</i>           | 0.51       | 0.18      | $9.0 \times 10^{-4}$  | 0.16       | 0.63      | $1.8 \times 10^{-5}$  |
| Bacteria | <i>Methylococcus capsulatus</i>          | 0.36       | 0.31      | $6.8 \times 10^{-1}$  | 0.10       | 0.54      | $4.8 \times 10^{-4}$  |
| Bacteria | <i>Micrococcus luteus</i>                | 0.70       | 0.19      | $6.9 \times 10^{-4}$  | -0.01      | 0.42      | $2.2 \times 10^{-3}$  |
| Bacteria | <i>Microcystis aeruginosa</i>            | 0.28       | 0.12      | $5.0 \times 10^{-2}$  | 0.18       | 0.08      | $2.0 \times 10^{-1}$  |
| Bacteria | <i>Moorella thermoacetica</i>            | 0.29       | 0.14      | $2.1 \times 10^{-1}$  | 0.22       | 0.32      | $4.1 \times 10^{-1}$  |
| Bacteria | <i>Mycobacterium avium</i>               | 0.33       | 0.07      | $6.8 \times 10^{-3}$  | -0.01      | 0.53      | $5.2 \times 10^{-9}$  |
| Bacteria | <i>Mycoplasma agalactiae</i>             | 0.04       | -0.21     | $5.8 \times 10^{-1}$  | 0.16       | -0.08     | $5.1 \times 10^{-1}$  |
| Bacteria | <i>Myzococcus xanthus</i>                | 0.56       | 0.34      | $6.3 \times 10^{-3}$  | 0.16       | 0.56      | $1.0 \times 10^{-6}$  |
| Bacteria | <i>Natronaerobius thermophilus</i>       | -0.07      | 0.13      | $1.2 \times 10^{-1}$  | 0.05       | 0.01      | $7.8 \times 10^{-1}$  |
| Bacteria | <i>Nautilia profundicola</i>             | 0.19       | 0.14      | $7.2 \times 10^{-1}$  | 0.16       | 0.04      | $3.6 \times 10^{-1}$  |
| Bacteria | <i>Neisseria gonorrhoeae</i>             | 0.46       | 0.05      | $4.3 \times 10^{-3}$  | -0.20      | 0.50      | $3.5 \times 10^{-5}$  |
| Bacteria | <i>Neorickettsia sennetsu</i>            | -0.14      | 0.19      | $1.3 \times 10^{-1}$  | -0.09      | 0.19      | $2.2 \times 10^{-1}$  |
| Bacteria | <i>Nitratiruptor</i> sp. SB155-2         | 0.41       | -0.07     | $4.8 \times 10^{-4}$  | 0.22       | -0.09     | $3.0 \times 10^{-2}$  |
| Bacteria | <i>Nitrobacter hamburgensis</i>          | 0.52       | 0.24      | $4.6 \times 10^{-3}$  | 0.06       | 0.79      | $1.6 \times 10^{-12}$ |
| Bacteria | <i>Nitrosococcus oceani</i>              | 0.35       | 0.17      | $1.3 \times 10^{-1}$  | 0.06       | 0.23      | $1.9 \times 10^{-1}$  |
| Bacteria | <i>Nitrosomonas europaea</i>             | 0.40       | 0.06      | $6.2 \times 10^{-3}$  | 0.21       | 0.36      | $2.5 \times 10^{-1}$  |
| Bacteria | <i>Nitrospira multififormis</i>          | 0.34       | 0.12      | $6.0 \times 10^{-2}$  | 0.32       | 0.35      | $8.1 \times 10^{-1}$  |
| Bacteria | <i>Nocardia farcinica</i>                | 0.35       | 0.12      | $1.2 \times 10^{-2}$  | 0.11       | 0.62      | $1.0 \times 10^{-8}$  |
| Bacteria | <i>Nocardioideus</i> sp. JS614           | 0.39       | 0.21      | $7.1 \times 10^{-2}$  | 0.19       | 0.50      | $1.2 \times 10^{-3}$  |
| Bacteria | <i>Nostoc punctiforme</i>                | 0.13       | 0.09      | $6.0 \times 10^{-1}$  | 0.19       | 0.12      | $3.7 \times 10^{-1}$  |
| Bacteria | <i>Novosphingobium aromaticivorans</i>   | 0.42       | 0.34      | $4.5 \times 10^{-1}$  | 0.34       | 0.63      | $1.7 \times 10^{-2}$  |
| Bacteria | <i>Oceanobacillus theyensis</i>          | 0.01       | 0.06      | $7.0 \times 10^{-1}$  | -0.03      | 0.13      | $1.5 \times 10^{-1}$  |
| Bacteria | <i>Ochrobactrum anthropi</i>             | 0.53       | 0.16      | $4.0 \times 10^{-5}$  | 0.21       | 0.53      | $4.1 \times 10^{-4}$  |
| Bacteria | <i>Oenococcus oeni</i>                   | 0.29       | 0.12      | $2.1 \times 10^{-1}$  | 0.05       | 0.07      | $9.0 \times 10^{-1}$  |
| Bacteria | <i>Oligotropha carboxidovorans</i>       | 0.59       | 0.14      | $1.5 \times 10^{-5}$  | 0.18       | 0.66      | $2.2 \times 10^{-5}$  |
| Bacteria | <i>Onion yellow</i>                      | 0.11       | -0.03     | $5.8 \times 10^{-1}$  | 0.07       | 0.16      | $6.7 \times 10^{-1}$  |
| Bacteria | <i>Opitutus terrae</i>                   | 0.76       | 0.40      | $7.5 \times 10^{-5}$  | 0.32       | 0.96      | $2.2 \times 10^{-11}$ |
| Bacteria | <i>Orientia tsutsugamushi</i>            | -1.45      | -0.26     | $4.2 \times 10^{-5}$  | -0.18      | -0.30     | $5.7 \times 10^{-1}$  |
| Bacteria | <i>Parabacteroides distasonis</i>        | 0.75       | 0.17      | $4.8 \times 10^{-9}$  | 0.45       | 0.46      | $9.0 \times 10^{-1}$  |
| Bacteria | <i>Paracoccus denitrificans</i>          | 0.51       | 0.20      | $1.7 \times 10^{-3}$  | 0.08       | 0.81      | $2.4 \times 10^{-14}$ |
| Bacteria | <i>Parvibaculum lavamentivorans</i>      | 0.56       | 0.27      | $6.0 \times 10^{-3}$  | 0.18       | 0.70      | $9.1 \times 10^{-7}$  |
| Bacteria | <i>Pasteurella multocida</i>             | 0.38       | 0.06      | $3.6 \times 10^{-2}$  | -0.03      | 0.21      | $1.2 \times 10^{-1}$  |
| Bacteria | <i>Pectobacterium atrosepticum</i>       | 0.40       | 0.03      | $6.9 \times 10^{-5}$  | 0.19       | 0.37      | $4.6 \times 10^{-2}$  |
| Bacteria | <i>Pediococcus pentosaceus</i>           | 0.34       | 0.02      | $2.1 \times 10^{-2}$  | 0.32       | 0.27      | $6.6 \times 10^{-1}$  |
| Bacteria | <i>Pelobacter carbinolicus</i>           | 0.52       | -0.12     | $1.5 \times 10^{-8}$  | 0.17       | 0.37      | $7.4 \times 10^{-2}$  |
| Bacteria | <i>Pelodictyon luteolum</i>              | 0.44       | 0.12      | $1.2 \times 10^{-2}$  | 0.26       | 0.53      | $4.9 \times 10^{-2}$  |
| Bacteria | <i>Pelotomaculum thermopropionicum</i>   | 0.39       | 0.06      | $3.0 \times 10^{-3}$  | 0.03       | 0.33      | $7.8 \times 10^{-3}$  |
| Bacteria | <i>Persephonella marina</i>              | 0.10       | 0.14      | $7.9 \times 10^{-1}$  | -0.05      | 0.20      | $7.3 \times 10^{-2}$  |
| Bacteria | <i>Petrogala mobilis</i>                 | 0.29       | -0.04     | $2.8 \times 10^{-2}$  | 0.07       | -0.05     | $4.6 \times 10^{-1}$  |
| Bacteria | <i>Phenyllobacterium zucineum</i>        | 0.66       | 0.45      | $6.2 \times 10^{-2}$  | 0.27       | 0.76      | $4.1 \times 10^{-5}$  |
| Bacteria | <i>Photobacterium profundum</i>          | 0.19       | -0.05     | $8.0 \times 10^{-3}$  | 0.17       | 0.08      | $3.0 \times 10^{-1}$  |
| Bacteria | <i>Photorhabdus luminescens</i>          | 0.34       | 0.03      | $1.7 \times 10^{-3}$  | 0.12       | 0.07      | $6.2 \times 10^{-1}$  |
| Bacteria | <i>Polaromonas naphthalenivorans</i>     | 0.97       | 0.10      | $1.1 \times 10^{-17}$ | 0.26       | 1.00      | $3.7 \times 10^{-11}$ |
| Bacteria | <i>Polynucleobacter necessarius</i>      | 0.26       | 0.21      | $6.9 \times 10^{-1}$  | 0.18       | 0.20      | $8.7 \times 10^{-1}$  |
| Bacteria | <i>Porphyromonas gingivalis</i>          | 0.54       | 0.12      | $1.2 \times 10^{-3}$  | 0.32       | 0.22      | $4.5 \times 10^{-1}$  |
| Bacteria | <i>Prochlorococcus marinus</i>           | -0.09      | -0.08     | $9.7 \times 10^{-1}$  | 0.11       | 0.08      | $7.9 \times 10^{-1}$  |
| Bacteria | <i>Propionibacterium acnes</i>           | 0.11       | 0.09      | $8.7 \times 10^{-1}$  | 0.19       | 0.08      | $4.5 \times 10^{-1}$  |
| Bacteria | <i>Prosthecochloris aestuarii</i>        | 0.53       | 0.29      | $4.5 \times 10^{-2}$  | 0.34       | 0.12      | $9.1 \times 10^{-2}$  |
| Bacteria | <i>Proteus mirabilis</i>                 | 0.25       | -0.07     | $4.9 \times 10^{-3}$  | 0.19       | 0.00      | $1.0 \times 10^{-1}$  |
| Bacteria | <i>Pseudoalteromonas atlantica</i>       | 0.26       | 0.13      | $1.6 \times 10^{-1}$  | 0.14       | 0.26      | $2.1 \times 10^{-1}$  |
| Bacteria | <i>Pseudomonas aeruginosa</i>            | 0.60       | 0.26      | $2.0 \times 10^{-5}$  | 0.19       | 0.77      | $3.3 \times 10^{-11}$ |
| Bacteria | <i>Psychrobacter arcticus</i>            | 0.40       | 0.31      | $4.3 \times 10^{-1}$  | 0.29       | 0.25      | $7.6 \times 10^{-1}$  |
| Bacteria | <i>Psychromonas ingrahamii</i>           | 0.40       | 0.24      | $7.7 \times 10^{-2}$  | 0.27       | 0.25      | $8.7 \times 10^{-1}$  |
| Bacteria | <i>Ralstonia solanacearum</i>            | 0.98       | 0.27      | $1.4 \times 10^{-10}$ | 0.31       | 0.98      | $6.3 \times 10^{-9}$  |
| Bacteria | <i>Renibacterium salmoninarum</i>        | 0.20       | 0.04      | $1.7 \times 10^{-1}$  | 0.04       | 0.09      | $6.9 \times 10^{-1}$  |
| Bacteria | <i>Rhizobium etli</i>                    | 0.51       | 0.23      | $2.7 \times 10^{-3}$  | 0.25       | 0.64      | $6.5 \times 10^{-5}$  |
| Bacteria | <i>Rhodobacter sphaeroides</i>           | 0.65       | 0.47      | $1.2 \times 10^{-1}$  | 0.33       | 0.61      | $2.7 \times 10^{-2}$  |
| Bacteria | <i>Rhodococcus erythropolis</i>          | 0.37       | 0.12      | $3.3 \times 10^{-3}$  | 0.07       | 0.29      | $1.4 \times 10^{-2}$  |
| Bacteria | <i>Rhodoferrax ferrireducens</i>         | 0.79       | 0.41      | $4.6 \times 10^{-5}$  | 0.37       | 0.82      | $2.6 \times 10^{-6}$  |
| Bacteria | <i>Rhodospirillum baltica</i>            | -0.04      | -0.06     | $8.1 \times 10^{-1}$  | -0.09      | 0.22      | $2.1 \times 10^{-4}$  |
| Bacteria | <i>Rhodospseudomonas palustris</i>       | 0.67       | 0.06      | $3.2 \times 10^{-10}$ | 0.11       | 0.79      | $1.1 \times 10^{-11}$ |
| Bacteria | <i>Rhodospirillum centenum</i>           | 0.66       | 0.25      | $3.2 \times 10^{-4}$  | 0.18       | 0.64      | $3.8 \times 10^{-5}$  |
| Bacteria | <i>Rickettsia akari</i>                  | 0.22       | 0.08      | $4.0 \times 10^{-1}$  | 0.11       | 0.01      | $5.4 \times 10^{-1}$  |
| Bacteria | <i>Roseiflexus castenholzii</i>          | 0.40       | 0.19      | $2.6 \times 10^{-2}$  | 0.17       | 0.42      | $5.1 \times 10^{-3}$  |

Continued on next page

| Type     | Species                                    | GC         |           |                      | ENC        |           |                       |
|----------|--------------------------------------------|------------|-----------|----------------------|------------|-----------|-----------------------|
|          |                                            | Highest 5% | Lowest 5% | P-value              | Highest 5% | Lowest 5% | P-value               |
| Bacteria | <i>Roseobacter denitrificans</i>           | 0.43       | 0.43      | $9.9 \times 10^{-1}$ | 0.43       | 0.53      | $3.1 \times 10^{-1}$  |
| Bacteria | <i>Rubrobacter zylanophilus</i>            | 0.24       | 0.14      | $4.0 \times 10^{-1}$ | 0.17       | 0.41      | $4.8 \times 10^{-2}$  |
| Bacteria | <i>Ruegeria pomeroyi</i>                   | 0.55       | 0.38      | $1.2 \times 10^{-1}$ | 0.34       | 0.75      | $4.1 \times 10^{-4}$  |
| Bacteria | <i>Saccharophagus degradans</i>            | 0.37       | 0.25      | $1.9 \times 10^{-1}$ | 0.20       | 0.06      | $1.4 \times 10^{-1}$  |
| Bacteria | <i>Saccharopolyspora erythraea</i>         | 0.33       | 0.08      | $1.2 \times 10^{-3}$ | 0.11       | 0.47      | $5.1 \times 10^{-6}$  |
| Bacteria | <i>Salinibacter ruber</i>                  | 0.67       | 0.42      | $4.3 \times 10^{-2}$ | 0.28       | 0.87      | $1.1 \times 10^{-6}$  |
| Bacteria | <i>Salinispora arenicola</i>               | 0.38       | 0.24      | $1.4 \times 10^{-1}$ | 0.09       | 0.36      | $2.6 \times 10^{-3}$  |
| Bacteria | <i>Salmonella enterica</i>                 | 0.45       | 0.02      | $5.4 \times 10^{-6}$ | 0.09       | 0.39      | $3.0 \times 10^{-3}$  |
| Bacteria | <i>Serratia proteamaculans</i>             | 0.58       | 0.08      | $4.9 \times 10^{-8}$ | 0.26       | 0.50      | $5.1 \times 10^{-3}$  |
| Bacteria | <i>Shewanella amazonensis</i>              | 0.45       | 0.22      | $1.8 \times 10^{-2}$ | 0.18       | 0.39      | $4.1 \times 10^{-2}$  |
| Bacteria | <i>Shigella boydii</i>                     | 0.64       | 0.18      | $3.4 \times 10^{-6}$ | 0.15       | 0.40      | $1.2 \times 10^{-2}$  |
| Bacteria | <i>Smorhizobium medicae</i>                | 0.50       | 0.17      | $1.4 \times 10^{-3}$ | 0.21       | 0.61      | $2.3 \times 10^{-4}$  |
| Bacteria | <i>Sodalis glossinidius</i>                | 0.55       | 0.20      | $9.3 \times 10^{-3}$ | 0.24       | 0.43      | $1.4 \times 10^{-1}$  |
| Bacteria | <i>Solibacter usitatus</i>                 | 0.35       | 0.24      | $1.1 \times 10^{-1}$ | 0.18       | 0.33      | $4.0 \times 10^{-2}$  |
| Bacteria | <i>Sorangium cellulosum</i>                | 0.49       | 0.35      | $3.4 \times 10^{-2}$ | 0.20       | 0.62      | $8.3 \times 10^{-10}$ |
| Bacteria | <i>Sphingomonas wittichii</i>              | 0.55       | 0.32      | $1.7 \times 10^{-2}$ | 0.27       | 0.66      | $3.2 \times 10^{-5}$  |
| Bacteria | <i>Sphingopyxis alaskensis</i>             | 0.47       | 0.32      | $2.0 \times 10^{-1}$ | 0.27       | 0.56      | $1.3 \times 10^{-2}$  |
| Bacteria | <i>Staphylococcus aureus</i>               | 0.06       | -0.01     | $5.9 \times 10^{-1}$ | -0.05      | 0.02      | $6.4 \times 10^{-1}$  |
| Bacteria | <i>Stenotrophomonas maltophilia</i>        | 0.66       | 0.20      | $7.3 \times 10^{-6}$ | 0.11       | 0.96      | $6.9 \times 10^{-14}$ |
| Bacteria | <i>Streptococcus agalactiae</i>            | 0.07       | 0.14      | $5.5 \times 10^{-1}$ | 0.20       | -0.07     | $5.6 \times 10^{-2}$  |
| Bacteria | <i>Streptomyces avermitilis</i>            | 0.54       | 0.19      | $8.9 \times 10^{-6}$ | 0.22       | 0.48      | $1.5 \times 10^{-3}$  |
| Bacteria | <i>Sulfurihydrogenibium azorense</i>       | 0.05       | -0.06     | $4.6 \times 10^{-1}$ | -0.30      | -0.05     | $1.6 \times 10^{-1}$  |
| Bacteria | <i>Sulfurimonas denitrificans</i>          | 0.27       | 0.13      | $3.3 \times 10^{-1}$ | 0.09       | 0.14      | $6.5 \times 10^{-1}$  |
| Bacteria | <i>Sulfurovum sp. NBC37-1</i>              | 0.43       | 0.20      | $3.7 \times 10^{-2}$ | 0.40       | 0.31      | $4.0 \times 10^{-1}$  |
| Bacteria | <i>Symbiobacterium thermophilum</i>        | 0.44       | 0.05      | $9.2 \times 10^{-4}$ | -0.01      | 0.39      | $1.6 \times 10^{-3}$  |
| Bacteria | <i>Synechococcus elongatus</i>             | 0.38       | 0.04      | $6.0 \times 10^{-3}$ | 0.17       | 0.44      | $2.2 \times 10^{-2}$  |
| Bacteria | <i>Synechocystis sp. PCC 6803</i>          | 0.43       | -0.09     | $9.3 \times 10^{-7}$ | 0.22       | 0.35      | $2.4 \times 10^{-1}$  |
| Bacteria | <i>Syntrophobacter fumaroxidans</i>        | 0.38       | 0.05      | $1.3 \times 10^{-3}$ | 0.19       | 0.47      | $6.0 \times 10^{-3}$  |
| Bacteria | <i>Syntrophomonas wolfei</i>               | 0.20       | -0.02     | $7.7 \times 10^{-2}$ | 0.16       | 0.23      | $5.8 \times 10^{-1}$  |
| Bacteria | <i>Syntrophus aciditrophicus</i>           | 0.44       | 0.04      | $7.2 \times 10^{-5}$ | 0.07       | 0.33      | $2.2 \times 10^{-2}$  |
| Bacteria | <i>Thauera sp. MZ1T</i>                    | 0.72       | 0.35      | $5.4 \times 10^{-4}$ | 0.39       | 0.86      | $1.9 \times 10^{-5}$  |
| Bacteria | <i>Thermoanaerobacter pseudethanolicus</i> | 0.03       | -0.09     | $3.7 \times 10^{-1}$ | 0.09       | 0.00      | $5.2 \times 10^{-1}$  |
| Bacteria | <i>Thermobifida fusca</i>                  | 0.44       | 0.29      | $1.9 \times 10^{-1}$ | 0.06       | 0.18      | $3.2 \times 10^{-1}$  |
| Bacteria | <i>Thermodesulfobivrio yellowstonii</i>    | 0.21       | 0.02      | $1.3 \times 10^{-1}$ | -0.05      | -0.02     | $8.3 \times 10^{-1}$  |
| Bacteria | <i>Thermomicrobium roseum</i>              | 0.34       | 0.10      | $8.8 \times 10^{-2}$ | 0.15       | 0.43      | $5.3 \times 10^{-2}$  |
| Bacteria | <i>Thermosipho africanus</i>               | -0.12      | -0.10     | $9.1 \times 10^{-1}$ | -0.01      | -0.08     | $6.7 \times 10^{-1}$  |
| Bacteria | <i>Thermosynechococcus elongatus</i>       | 0.23       | 0.16      | $5.6 \times 10^{-1}$ | 0.12       | 0.19      | $6.0 \times 10^{-1}$  |
| Bacteria | <i>Thermotoga lettingae</i>                | 0.12       | -0.10     | $1.1 \times 10^{-1}$ | -0.07      | -0.07     | $9.9 \times 10^{-1}$  |
| Bacteria | <i>Thermus thermophilus</i>                | 0.11       | 0.09      | $8.6 \times 10^{-1}$ | 0.25       | 0.22      | $8.9 \times 10^{-1}$  |
| Bacteria | <i>Thioalkalivibrio sp. HL-EbGR7</i>       | 0.73       | 0.13      | $3.3 \times 10^{-7}$ | 0.08       | 0.90      | $1.2 \times 10^{-9}$  |
| Bacteria | <i>Thiobacillus denitrificans</i>          | 0.42       | 0.26      | $1.7 \times 10^{-1}$ | 0.20       | 0.87      | $1.0 \times 10^{-6}$  |
| Bacteria | <i>Thiomicrospira crunogena</i>            | 0.36       | 0.21      | $2.2 \times 10^{-1}$ | 0.35       | 0.30      | $7.1 \times 10^{-1}$  |
| Bacteria | <i>Tolunoma auensis</i>                    | 0.53       | 0.21      | $1.5 \times 10^{-3}$ | 0.17       | 0.39      | $5.9 \times 10^{-2}$  |
| Bacteria | <i>Treponema denticola</i>                 | 0.37       | -0.01     | $1.9 \times 10^{-3}$ | 0.34       | 0.01      | $8.6 \times 10^{-3}$  |
| Bacteria | <i>Trichodesmium erythraeum</i>            | 0.17       | -0.03     | $3.8 \times 10^{-2}$ | 0.10       | 0.13      | $7.9 \times 10^{-1}$  |
| Bacteria | <i>Tropheryma whipplei</i>                 | -0.39      | -0.23     | $5.0 \times 10^{-1}$ | 0.00       | -0.10     | $6.6 \times 10^{-1}$  |
| Bacteria | <i>Ureaplasma parvum</i>                   | -0.17      | -0.50     | $6.2 \times 10^{-1}$ | -0.32      | 0.29      | $2.5 \times 10^{-1}$  |
| Bacteria | <i>Variovorax paradoxus</i>                | 0.82       | 0.46      | $8.3 \times 10^{-6}$ | 0.41       | 1.06      | $5.4 \times 10^{-15}$ |
| Bacteria | <i>Verminephrobacter eiseniae</i>          | 0.53       | 0.29      | $1.3 \times 10^{-2}$ | 0.25       | 0.77      | $1.4 \times 10^{-7}$  |
| Bacteria | <i>Vibrio cholerae</i>                     | 0.41       | 0.10      | $2.1 \times 10^{-3}$ | 0.11       | 0.05      | $6.1 \times 10^{-1}$  |
| Bacteria | <i>Wigglesworthia glossinidia</i>          | -0.45      | -0.22     | $4.3 \times 10^{-1}$ | -0.15      | -0.11     | $8.6 \times 10^{-1}$  |
| Bacteria | <i>Wolbachia endosymbiont</i>              | 0.21       | 0.04      | $3.1 \times 10^{-1}$ | 0.06       | 0.06      | $9.8 \times 10^{-1}$  |
| Bacteria | <i>Wolinella succinogenes</i>              | 0.21       | -0.19     | $9.4 \times 10^{-3}$ | 0.23       | 0.40      | $1.9 \times 10^{-1}$  |
| Bacteria | <i>Xanthobacter autotrophicus</i>          | 0.62       | 0.24      | $4.6 \times 10^{-5}$ | 0.16       | 0.68      | $4.5 \times 10^{-7}$  |
| Bacteria | <i>Xanthomonas axonopodis</i>              | 0.59       | 0.17      | $2.8 \times 10^{-5}$ | -0.03      | 0.80      | $1.5 \times 10^{-14}$ |
| Bacteria | <i>Xylella fastidiosa</i>                  | 0.45       | -0.02     | $1.2 \times 10^{-4}$ | 0.05       | 0.21      | $2.5 \times 10^{-1}$  |
| Bacteria | <i>Yersinia enterocolitica</i>             | 0.43       | 0.08      | $2.0 \times 10^{-4}$ | 0.13       | 0.24      | $2.4 \times 10^{-1}$  |
| Bacteria | <i>Zymomonas mobilis</i>                   | 0.08       | -0.43     | $2.9 \times 10^{-3}$ | 0.21       | -0.05     | $8.8 \times 10^{-2}$  |
| Archaea  | <i>Aeropyrum pernix</i>                    | 0.32       | -0.08     | $1.3 \times 10^{-2}$ | -0.13      | 0.21      | $3.0 \times 10^{-2}$  |
| Archaea  | <i>Caldivirga maquilingensis</i>           | -0.02      | -0.03     | $9.1 \times 10^{-1}$ | -0.10      | -0.19     | $5.4 \times 10^{-1}$  |
| Archaea  | <i>Desulfurococcus kamchatkensis</i>       | 0.07       | 0.12      | $7.3 \times 10^{-1}$ | 0.22       | -0.05     | $9.5 \times 10^{-2}$  |
| Archaea  | <i>Haloarcula marismortui</i>              | 0.30       | 0.13      | $1.1 \times 10^{-1}$ | 0.20       | 0.62      | $1.1 \times 10^{-4}$  |
| Archaea  | <i>Halobacterium salinarum</i>             | 0.24       | 0.17      | $5.8 \times 10^{-1}$ | 0.21       | 0.40      | $1.8 \times 10^{-1}$  |
| Archaea  | <i>Haloquadratum walsbyi</i>               | 0.02       | -0.06     | $5.3 \times 10^{-1}$ | 0.12       | 0.10      | $8.9 \times 10^{-1}$  |
| Archaea  | <i>Halorubrum lacusprofundi</i>            | 0.38       | 0.28      | $3.8 \times 10^{-1}$ | 0.24       | 0.46      | $5.9 \times 10^{-2}$  |
| Archaea  | <i>Hyperthermus butylicus</i>              | 0.06       | -0.14     | $2.5 \times 10^{-1}$ | -0.12      | -0.05     | $6.7 \times 10^{-1}$  |
| Archaea  | <i>Ignicoccus hospitalis</i>               | -0.02      | 0.06      | $6.0 \times 10^{-1}$ | 0.24       | 0.10      | $4.1 \times 10^{-1}$  |
| Archaea  | <i>Metallosphaera sedula</i>               | 0.14       | -0.21     | $7.7 \times 10^{-3}$ | 0.14       | 0.06      | $5.5 \times 10^{-1}$  |
| Archaea  | <i>Methanobrevibacter smithii</i>          | 0.22       | 0.18      | $7.4 \times 10^{-1}$ | 0.07       | 0.14      | $6.5 \times 10^{-1}$  |
| Archaea  | <i>Methanocaldococcus jannaschii</i>       | 0.06       | -0.01     | $6.5 \times 10^{-1}$ | 0.25       | -0.12     | $3.6 \times 10^{-2}$  |
| Archaea  | <i>Methanococcoides burtonii</i>           | 0.52       | -0.02     | $5.8 \times 10^{-6}$ | 0.05       | 0.25      | $1.4 \times 10^{-1}$  |
| Archaea  | <i>Methanococcus aeolicus</i>              | -0.07      | 0.02      | $6.1 \times 10^{-1}$ | -0.02      | 0.04      | $7.2 \times 10^{-1}$  |
| Archaea  | <i>Methanocorpusculum labreanum</i>        | 0.45       | 0.00      | $7.3 \times 10^{-3}$ | 0.41       | 0.53      | $4.1 \times 10^{-1}$  |

Continued on next page

| Type    | Species                                       | GC         |           |                       | ENC        |           |                       |
|---------|-----------------------------------------------|------------|-----------|-----------------------|------------|-----------|-----------------------|
|         |                                               | Highest 5% | Lowest 5% | P-value               | Highest 5% | Lowest 5% | P-value               |
| Archaea | <i>Methanoculleus marisnigri</i>              | 0.46       | 0.03      | $3.3 \times 10^{-3}$  | 0.00       | 0.38      | $1.2 \times 10^{-2}$  |
| Archaea | <i>Methanopyrus kandleri</i>                  | 0.01       | -0.19     | $1.6 \times 10^{-1}$  | 0.02       | -0.03     | $7.6 \times 10^{-1}$  |
| Archaea | <i>Methanosacta thermophila</i>               | 0.55       | -0.17     | $8.8 \times 10^{-5}$  | -0.27      | 0.09      | $5.6 \times 10^{-2}$  |
| Archaea | <i>Methanosarcina acetivorans</i>             | 0.36       | -0.15     | $2.0 \times 10^{-7}$  | 0.06       | 0.01      | $5.9 \times 10^{-1}$  |
| Archaea | <i>Methanosphaera stadtmanae</i>              | 0.05       | 0.12      | $6.5 \times 10^{-1}$  | 0.16       | 0.09      | $6.5 \times 10^{-1}$  |
| Archaea | <i>Methanosphaerula palustris</i>             | 0.44       | 0.24      | $9.2 \times 10^{-2}$  | 0.20       | 0.49      | $4.5 \times 10^{-2}$  |
| Archaea | <i>Methanospirillum hungatei</i>              | 0.18       | -0.10     | $9.1 \times 10^{-3}$  | 0.15       | 0.14      | $9.3 \times 10^{-1}$  |
| Archaea | <i>Methanothermobacter thermautotrophicus</i> | 0.23       | -0.03     | $1.0 \times 10^{-1}$  | -0.01      | 0.18      | $2.8 \times 10^{-1}$  |
| Archaea | <i>Nanoarchaeum equitans</i>                  | -0.19      | -0.11     | $7.8 \times 10^{-1}$  | -0.58      | -0.15     | $1.5 \times 10^{-1}$  |
| Archaea | <i>Natronomonas pharaonis</i>                 | 0.20       | 0.08      | $3.3 \times 10^{-1}$  | 0.19       | 0.31      | $3.4 \times 10^{-1}$  |
| Archaea | <i>Nitrosopumilus maritimus</i>               | -0.14      | -0.11     | $8.1 \times 10^{-1}$  | -0.13      | -0.02     | $4.9 \times 10^{-1}$  |
| Archaea | <i>Picrophilus torridus</i>                   | 0.21       | -0.19     | $1.8 \times 10^{-2}$  | -0.06      | -0.02     | $8.0 \times 10^{-1}$  |
| Archaea | <i>Pyrobaculum aerophilum</i>                 | 0.21       | -0.12     | $7.9 \times 10^{-3}$  | -0.03      | 0.08      | $4.1 \times 10^{-1}$  |
| Archaea | <i>Pyrococcus abyssi</i>                      | -0.02      | 0.02      | $8.1 \times 10^{-1}$  | 0.10       | 0.18      | $6.1 \times 10^{-1}$  |
| Archaea | <i>Staphylothermus marinus</i>                | -0.05      | -0.03     | $8.6 \times 10^{-1}$  | -0.06      | -0.10     | $8.2 \times 10^{-1}$  |
| Archaea | <i>Sulfolobus acidocaldarius</i>              | 0.30       | -0.03     | $4.5 \times 10^{-3}$  | 0.03       | -0.06     | $5.0 \times 10^{-1}$  |
| Archaea | <i>Thermococcus gammatolerans</i>             | 0.17       | -0.03     | $1.5 \times 10^{-1}$  | 0.01       | 0.28      | $5.8 \times 10^{-2}$  |
| Archaea | <i>Thermofilum pendens</i>                    | 0.40       | 0.15      | $7.7 \times 10^{-2}$  | 0.19       | 0.37      | $1.9 \times 10^{-1}$  |
| Archaea | <i>Thermoplasma acidophilum</i>               | 0.28       | 0.09      | $2.3 \times 10^{-1}$  | -0.10      | 0.37      | $1.1 \times 10^{-2}$  |
| Archaea | <i>Thermoproteus neutrophilus</i>             | 0.24       | -0.10     | $3.9 \times 10^{-2}$  | -0.17      | 0.08      | $1.3 \times 10^{-1}$  |
| Fungi   | <i>Aspergillus fumigatus</i>                  | 0.59       | 0.00      | $1.8 \times 10^{-21}$ | 0.03       | 0.38      | $2.1 \times 10^{-8}$  |
| Fungi   | <i>Candida dubliniensis</i>                   | 0.40       | -0.11     | $7.5 \times 10^{-10}$ | 0.11       | 0.11      | $9.9 \times 10^{-1}$  |
| Fungi   | <i>Cryptococcus neoformans</i>                | 0.39       | 0.12      | $5.6 \times 10^{-4}$  | 0.15       | 0.45      | $1.2 \times 10^{-4}$  |
| Fungi   | <i>Debaryomyces hansenii</i>                  | 0.38       | -0.06     | $2.4 \times 10^{-7}$  | 0.19       | 0.42      | $4.1 \times 10^{-3}$  |
| Fungi   | <i>Encephalitozoon cuniculi</i>               | 0.09       | 0.09      | 1                     | 0.14       | 0.35      | $1.4 \times 10^{-1}$  |
| Fungi   | <i>Eremothecium gossypii</i>                  | 0.80       | -0.05     | $7.4 \times 10^{-18}$ | 0.12       | 0.87      | $8.5 \times 10^{-15}$ |
| Fungi   | <i>Kluyveromyces lactis</i>                   | 0.33       | 0.00      | $4.0 \times 10^{-4}$  | 0.04       | 0.49      | $3.5 \times 10^{-6}$  |
| Fungi   | <i>Pichia stipitis</i>                        | 0.34       | -0.04     | $9.8 \times 10^{-6}$  | -0.01      | 0.57      | $3.7 \times 10^{-10}$ |
| Fungi   | <i>Saccharomyces cerevisiae</i>               | 0.50       | 0.02      | $1.1 \times 10^{-10}$ | 0.13       | 0.46      | $8.2 \times 10^{-5}$  |
| Fungi   | <i>Schizosaccharomyces pombe</i>              | 0.26       | 0.00      | $6.4 \times 10^{-3}$  | -0.02      | 0.19      | $2.1 \times 10^{-2}$  |
| Fungi   | <i>Yarrowia lipolytica</i>                    | 0.52       | 0.06      | $4.1 \times 10^{-8}$  | 0.01       | 0.57      | $3.5 \times 10^{-10}$ |
| Plant   | <i>Arabidopsis thaliana</i>                   | 0.17       | -0.04     | $5.0 \times 10^{-8}$  | 0.03       | 0.05      | $6.1 \times 10^{-1}$  |
| Plant   | <i>Oryza sativa</i>                           | 0.34       | -0.24     | $1.1 \times 10^{-31}$ | -0.57      | 0.46      | $4.8 \times 10^{-81}$ |
| Insect  | <i>Anopheles gambiae</i>                      | 0.47       | 0.04      | $4.8 \times 10^{-11}$ | 0.09       | 0.64      | $2.2 \times 10^{-15}$ |
| Insect  | <i>Drosophila melanogaster</i>                | 0.34       | -0.08     | $1.2 \times 10^{-13}$ | 0.07       | 0.55      | $7.4 \times 10^{-17}$ |
| Fish    | <i>Danio rerio</i>                            | 0.24       | 0.07      | $2.9 \times 10^{-4}$  | -0.02      | 0.23      | $6.6 \times 10^{-7}$  |
| Fish    | <i>Gasterosteus aculeatus</i>                 | 0.21       | 0.02      | $1.3 \times 10^{-3}$  | 0.11       | 0.35      | $3.6 \times 10^{-5}$  |
| Fish    | <i>Oryzias latipes</i>                        | 0.14       | 0.03      | $8.2 \times 10^{-2}$  | -0.03      | 0.23      | $1.9 \times 10^{-5}$  |
| Fish    | <i>Takifugu rubripes</i>                      | 0.26       | -0.01     | $2.3 \times 10^{-4}$  | -0.01      | 0.30      | $5.1 \times 10^{-6}$  |
| Bird    | <i>Gallus gallus</i>                          | 0.07       | -0.14     | $2.2 \times 10^{-3}$  | -0.51      | 0.02      | $3.5 \times 10^{-12}$ |
| Bird    | <i>Taeniopygia guttata</i>                    | 0.03       | -0.38     | $6.5 \times 10^{-6}$  | -0.39      | 0.01      | $2.3 \times 10^{-5}$  |
| Mammal  | <i>Bos taurus</i>                             | 0.11       | -0.19     | $3.8 \times 10^{-7}$  | -0.46      | 0.16      | $4.8 \times 10^{-24}$ |
| Mammal  | <i>Canis familiaris</i>                       | 0.12       | -0.31     | $7.9 \times 10^{-11}$ | -0.46      | 0.20      | $4.2 \times 10^{-21}$ |
| Mammal  | <i>Equus caballus</i>                         | 0.13       | -0.22     | $1.5 \times 10^{-9}$  | -0.37      | 0.11      | $4.5 \times 10^{-14}$ |
| Mammal  | <i>Homo sapiens</i>                           | 0.12       | -0.30     | $2.2 \times 10^{-18}$ | -0.39      | 0.12      | $4.4 \times 10^{-25}$ |
| Mammal  | <i>Loxodonta africana</i>                     | 0.13       | -0.18     | $4.6 \times 10^{-3}$  | -0.20      | 0.17      | $2.5 \times 10^{-3}$  |
| Mammal  | <i>Mus musculus</i>                           | 0.07       | -0.26     | $3.1 \times 10^{-13}$ | -0.32      | 0.08      | $5.1 \times 10^{-19}$ |
| Mammal  | <i>Pteropus vampyrus</i>                      | 0.14       | -0.28     | $7.2 \times 10^{-8}$  | -0.37      | 0.09      | $2.4 \times 10^{-8}$  |
| Mammal  | <i>Tursiops truncatus</i>                     | 0.11       | -0.26     | $7.3 \times 10^{-6}$  | -0.44      | 0.20      | $8.4 \times 10^{-14}$ |

Note.—The P-values were obtained by t-test.
